# Supplementary material for: Small molecule Y-320 stimulates ribosome biogenesis, protein synthesis, and aminoglycoside-induced premature termination codon readthrough
Source: PLoS Biol. 2021 May 3;19(5):e3001221. doi: 10.1371/journal.pbio.3001221 (PMC8118496; doi:10.1371/journal.pbio.3001221)
Supplement: S2 Data — All numerical raw data associated with Fig 4A–4C. File contains multiple tabs with labels corresponding to the relevant figure. (XLSX) [file pbio.3001221.s016.xlsx]

## Sheet: Fig 4A
	rRNA
	24 h				48 h
Untreated	118.665	136.075	141.375	135.665	137.715	147.815	139.485	145.885
G418 (200 µM)	120.605	126.115	125.265	134.725	155.805	166.125	150.095	146.775
Y-320 (1 µM)	137.055	141.235	157.095	131.935	172.935	201.245	189.245	185.885
Y-320 (2 µM)	166.555	168.415	159.865	151.595	324.975	371.875	341.835	304.375
Y-320 (1 µM)+G418 (200 µM)	124.375	117.915	121.875	112.845	180.545	168.225	162.295	182.835
Y-320 (2 µM)+G418 (200 µM)	147.665	142.895	142.635	127.495	302.275	259.595	271.615	208.925
	rpS6
	24 h				48 h
Untreated	32.965	33.575	34.085	35.925	42.195	42.105	37.675	36.625
G418 (200 µM)	35.005	35.855	37.855	34.295	40.725	44.145	40.665	43.395
Y-320 (1 µM)	42.935	36.445	36.695	34.515	51.095	57.175	57.615	64.645
Y-320 (2 µM)	51.535	54.155	52.945	56.055	156.545	156.945	136.965	139.325
Y-320 (1 µM)+G418 (200 µM)	43.835	35.985	32.915	33.525	62.475	61.695	48.725	63.255
Y-320 (2 µM)+G418 (200 µM)	46.255	42.695	41.795	43.815	114.235	108.675	106.795	113.355

## Sheet: Fig 4B
Untreated		G418 (200 µM)		Y-320 (2 µM)		Y-320 (2 µM)+G418 (200 µM)
Puromycin	rRNA	Puromycin	rRNA	Puromycin	rRNA	Puromycin	rRNA
15.3281	48.8603	2.18991	104.393	15.6635	0.27451	14.3666	450.048
16.1317	317.674	8.12439	20.9243	16.5326	150.735	14.4424	9.5177
17.6945	311.155	11.0173	83.0817	16.8042	177.604	15.1166	271.785
17.8675	161.278	13.9148	111.644	17.1156	204.611	15.8688	138.555
18.0073	48.3706	14.858	146.363	17.14	122.469	15.9473	205.744
19.0295	68.3288	15.4121	26.3489	17.5495	252.385	17.0222	254.574
19.4888	553.502	15.596	77.8918	17.599	269.325	17.2236	82.5638
19.6087	155.135	16.1126	132.369	17.7888	369.7	17.9803	243.806
19.7071	89.8844	16.4601	119.629	18.0125	436.651	18.4019	979.491
19.7887	107.907	16.6248	341.5	18.1744	449.296	18.7091	118.003
19.8328	48.5567	16.9012	226.085	18.2468	70.0593	18.7722	199.319
20.0102	41.5445	17.119	190.997	18.7461	617.334	19.0443	141.704
20.0535	77.4756	17.385	53.0498	18.832	217.934	19.2479	236.595
20.116	95.9294	17.4089	19.7551	19.1003	384.37	19.3705	266.061
20.2164	60.7818	17.5326	171.875	19.1567	181.968	19.4167	292.079
20.3095	13.3553	17.6549	183.484	19.239	219.947	19.733	438.885
20.523	87.6381	17.7655	98.656	19.2735	248.987	20.2998	200.7
20.5695	34.9062	17.8965	94.6413	19.5846	226.541	20.4482	117.215
20.6308	95.8342	17.9751	123.214	19.6253	368.729	20.4877	159.996
20.6732	166.432	18.1072	158.769	19.6811	163.798	20.6138	329.378
20.7494	96.7845	18.2257	219.666	19.8601	765.47	20.6217	173.602
20.8143	66.3517	18.2492	97.4784	19.8908	129.004	20.6341	181.74
20.8483	212.004	18.2786	83.9408	19.9454	18.4879	20.8097	200.336
20.9069	76.0582	18.375	30.1071	20.1113	134.919	20.9708	37.5878
20.9402	106.386	18.4001	268.313	20.2108	326.271	21.0292	222.442
20.9712	149.459	18.425	90.7016	20.3146	178.12	21.0417	245.441
20.9892	173.621	18.5255	88.6425	20.4031	182.936	21.0473	102.234
20.994	86.985	18.5281	113.949	20.4137	131.823	21.0844	227.964
20.9953	97.8545	18.5486	162.119	20.4747	117.245	21.0951	160.581
21.0423	192.533	18.756	167.421	20.4763	127.561	21.0965	149.078
21.0874	185.538	18.7674	165.161	20.5588	241.427	21.1125	172.08
21.1242	83.3295	18.7851	199.064	20.5968	351.787	21.1533	180.579
21.1283	177.836	18.9578	31.5298	20.9188	107.949	21.2411	160.623
21.1512	116.022	18.9589	115.764	20.9357	452.754	21.3781	145.764
21.1803	98.1856	19.0758	139.955	20.9534	157.602	21.3839	158.183
21.1929	210.489	19.1118	180.317	20.9681	74.9082	21.398	153.457
21.2107	122.165	19.1624	183.854	21.0703	252.136	21.4183	155.323
21.2167	67.0908	19.3224	116.873	21.1383	81.6432	21.491	129.987
21.278	2.01825	19.3266	119.212	21.2631	206.091	21.5421	160.715
21.3007	66.0552	19.4223	179.442	21.2663	87.5419	21.5474	108.737
21.3197	133.689	19.4467	114.056	21.3609	158.632	21.5712	47.4032
21.344	100.073	19.4492	65.3295	21.4204	135.17	21.6217	136.467
21.3516	63.3253	19.5215	75.5841	21.4487	127.246	21.6606	153.536
21.3617	134.003	19.5377	49.2797	21.6318	188.091	21.7548	96.868
21.3966	328.391	19.5521	129.897	21.6713	112.272	21.8387	155.47
21.4006	106.729	19.5912	145.697	21.7788	127.702	21.8576	168.64
21.4258	127.444	19.6372	151.271	21.7892	35.2446	21.8603	178.907
21.4291	148.495	19.6562	94.6574	21.8624	134.868	21.8618	50.4855
21.4342	162.521	19.7186	180.661	21.8866	273.869	21.8968	346.703
21.4579	73.3468	19.7631	151.162	22.0516	178.306	21.9034	308.832
21.459	75.5615	19.818	137.584	22.1474	199.949	21.9211	123.677
21.4738	50.3032	19.88	158.519	22.2142	69.7975	21.9774	272.102
21.4812	93.394	19.9352	111.704	22.2469	168.622	21.9778	130.432
21.4956	32.7151	19.9404	94.5817	22.2743	112.333	22.0579	306.803
21.5061	138.684	19.9585	122.613	22.3242	110.436	22.0818	207.502
21.5152	117.025	19.961	76.3223	22.3416	107.727	22.1528	195.426
21.52	147.872	19.9774	128.973	22.3487	149.018	22.1582	150.264
21.5265	116.223	20.0025	128.54	22.4377	191.649	22.1726	112.405
21.5422	97.0924	20.0125	186.171	22.4794	430.925	22.2112	133.606
21.5436	95.3644	20.0233	113.56	22.4998	93.5283	22.2236	272.924
21.5475	101.945	20.0574	200.21	22.5746	189.727	22.2372	86.2662
21.5588	207.691	20.0585	119.528	22.5977	258.686	22.2569	105.641
21.5814	111.469	20.0642	104.035	22.6765	231.356	22.2878	96.0639
21.5855	134.386	20.074	117.951	22.7226	162.708	22.3284	121.765
21.5907	163.465	20.0787	90.913	22.772	141.019	22.3683	136.133
21.6214	18.1655	20.0867	110.029	22.832	234.724	22.4329	256.506
21.622	124.171	20.0945	64.358	22.8541	321.222	22.4444	148.953
21.6301	100.302	20.1092	113.405	22.8939	67.6383	22.4773	155.089
21.6309	107.152	20.1123	56.2108	22.9016	224.146	22.4884	169.769
21.6315	99.0447	20.1326	90.4147	22.9552	228.424	22.5169	82.1431
21.6544	80.1489	20.1683	116.421	22.9609	356.308	22.5721	107.01
21.6852	63.4087	20.2302	116.588	22.9649	292.03	22.5943	115.554
21.6869	108.104	20.2482	135.159	22.9837	187.079	22.6353	133.014
21.6931	136.942	20.2642	160.067	23.0102	264.207	22.6611	64.3344
21.7006	135.429	20.2769	128.756	23.1789	405.498	22.6761	111.5
21.7113	184.488	20.2805	194.327	23.2028	127.369	22.7031	111.564
21.7422	155.431	20.2887	244.251	23.2775	241.152	22.7364	125.378
21.7479	274.216	20.3213	124.923	23.348	197.753	22.7559	243.757
21.7487	102.067	20.3319	114.691	23.3483	137.163	22.7847	162.211
21.7519	180.604	20.3332	57.4965	23.3564	177.885	22.7979	97.0966
21.758	130.08	20.3471	138.807	23.3796	138.937	22.8208	116.798
21.7594	52.701	20.3946	104.072	23.4407	253.188	22.8256	246.882
21.7617	81.1569	20.3946	177.078	23.4701	194.8	22.8309	161.126
21.7672	181.272	20.4204	71.7773	23.5385	142.104	22.837	179.771
21.7752	129.557	20.4254	79.8151	23.5629	197.773	22.8577	141.862
21.8018	97.4737	20.4454	94.2559	23.5743	253.528	22.8726	174.386
21.8029	109.326	20.4552	114.273	23.6212	264.829	22.9053	176.013
21.8063	98.4725	20.4695	238.371	23.6396	303.801	22.9363	217.1
21.8076	127.143	20.5076	116.907	23.6407	183.995	23.0668	146.489
21.8081	105.265	20.5096	150.907	23.6418	147.27	23.0963	147.37
21.8255	268.848	20.543	85.3677	23.6623	180.272	23.1602	106.743
21.8311	93.9745	20.5686	63.5804	23.708	162.221	23.1807	164.817
21.8337	72.3542	20.5706	172.004	23.7147	204.616	23.2125	112.429
21.8388	25.5805	20.58	88.847	23.7336	184.276	23.2654	253.421
21.8465	168.519	20.5812	252.182	23.7441	329.226	23.2796	121.335
21.8567	167.273	20.5853	153.141	23.7477	330.471	23.2868	250.781
21.8607	108.71	20.5988	172.726	23.7612	220.694	23.3551	133.661
21.8698	83.3693	20.6277	350.719	23.7809	165.385	23.3574	149.077
21.9031	122.638	20.6282	93.161	23.7915	189.403	23.3709	179.674
21.906	113.277	20.6285	97.1121	23.7935	85.6717	23.3792	281.872
21.91	57.7488	20.6445	110.869	23.8319	329.332	23.3929	460.089
21.9158	181.301	20.646	126.978	23.9053	131.482	23.3942	172.742
21.9176	89.6509	20.6497	217.689	23.9185	186.111	23.3995	184.707
21.9248	54.3375	20.6499	103.592	23.9189	332.224	23.4152	124.327
21.9293	65.4984	20.6537	115.693	23.919	155.493	23.4209	151.979
21.945	131.468	20.6564	81.8349	23.9281	183.061	23.4551	294.228
21.9528	62.5439	20.6567	151.143	23.9536	202.275	23.4847	105.333
21.9568	100.78	20.6601	230.081	23.9619	125.218	23.4893	95.6077
21.9568	55.362	20.6603	142.654	24.0056	216.423	23.4942	211.333
21.961	124.437	20.661	126.875	24.0109	243.928	23.5012	191.605
21.9612	83.8021	20.6772	104.22	24.0282	128.077	23.5314	150.565
21.9625	277.365	20.6873	108.95	24.064	70.5646	23.5374	87.1317
21.9642	109.339	20.6983	169.695	24.1728	105.487	23.5571	190.26
21.9697	106.375	20.7022	60.8121	24.1761	236.443	23.5815	339.503
21.9749	94.671	20.7069	194.454	24.1912	313.931	23.584	133.886
21.9753	105.01	20.7125	114.719	24.2812	148.709	23.598	204.052
21.9926	134.319	20.7145	168.319	24.3153	187.503	23.5981	115.219
21.9939	109.629	20.7171	83.3805	24.3506	365.172	23.6021	144.169
22.0028	107.179	20.7365	122.498	24.3556	194.477	23.6063	145.267
22.0082	112.026	20.7378	88.6684	24.3747	225.094	23.6291	115.73
22.0099	163.799	20.7488	116.208	24.4251	81.5951	23.6298	322.834
22.0099	84.2421	20.7579	121.496	24.4649	293.659	23.6468	127.42
22.016	150.898	20.7789	99.0813	24.4814	209.02	23.6528	165.146
22.0197	52.1674	20.7889	127.393	24.4826	108.997	23.6846	219.869
22.021	52.5403	20.8229	152.455	24.4848	232.721	23.7188	132.341
22.029	341.454	20.8288	108.724	24.5005	355.347	23.7454	78.5555
22.0339	176.674	20.8392	99.6674	24.5287	186.46	23.7548	159.764
22.034	101.57	20.856	76.3517	24.5545	169.408	23.7643	199.681
22.0343	143.761	20.8622	214.652	24.6236	173.106	23.7757	166.628
22.0565	133.261	20.8727	94.9688	24.6596	194.006	23.8076	190.354
22.0621	148.783	20.909	89.3684	24.66	147.431	23.8216	242.886
22.0624	94.3469	20.9115	122.754	24.6632	217.16	23.829	135.971
22.063	99.8656	20.9165	85.1327	24.6665	222.471	23.864	242.361
22.0734	204.573	20.9175	104.926	24.6939	151.34	23.8763	146.054
22.0749	58.963	20.9184	194.799	24.7063	310.991	23.8872	199.326
22.0766	86.8086	20.9259	88.4668	24.7697	118.967	23.8938	311.641
22.081	75.4819	20.9473	97.1343	24.8023	146.538	23.905	107.476
22.085	130.647	20.9516	154.309	24.8274	193.945	23.9112	200.025
22.0913	82.9247	20.9747	103.066	24.8688	183.324	23.9161	214.276
22.0953	87.049	20.9768	77.3433	24.8821	236.447	23.934	185.143
22.0993	84.3344	20.9821	154.402	24.8959	193.069	23.9389	165.129
22.1111	56.3013	21.0185	106.203	24.8998	284.462	23.9694	201.205
22.1119	164.966	21.029	135.58	24.9034	268.312	24.0015	123.274
22.1188	225.608	21.033	115.402	24.915	375.508	24.0025	167.017
22.1211	68.5067	21.0399	80.5127	24.9159	328.31	24.0366	141.821
22.1361	121.699	21.0413	75.5809	24.9235	264.481	24.0632	193.91
22.1378	69.0204	21.0424	129.599	24.937	234.355	24.0995	262.371
22.1379	111.606	21.0498	184.599	24.9433	290.173	24.1601	203.505
22.1502	118.496	21.06	85.2194	24.9437	228.278	24.1994	210.609
22.1552	72.6347	21.0606	96.4858	24.9492	256.025	24.2134	198.162
22.1636	82.7818	21.061	93.7506	24.979	249.72	24.2757	214.346
22.1695	130.75	21.063	92.7602	24.9818	109.564	24.2837	192.732
22.1704	76.0813	21.0672	85.9109	25.0119	183.218	24.3625	140.696
22.1788	106.021	21.0783	136.405	25.0141	293.147	24.369	156.541
22.1808	81.1237	21.0898	151.122	25.0526	205.811	24.3723	174.547
22.1863	177.288	21.0957	87.8533	25.0536	170.239	24.3849	177.977
22.1925	83.5802	21.1046	153.858	25.1113	160.886	24.3915	121.339
22.2021	168.931	21.1124	125.85	25.1201	219.238	24.4057	186.064
22.2066	146.557	21.1228	109.759	25.1403	269.478	24.4135	242.355
22.2079	119.766	21.1255	79.9404	25.1492	156.193	24.4176	215.875
22.2183	158.77	21.1288	85.8173	25.1925	267.289	24.4425	243.285
22.2202	153.087	21.1439	88.262	25.1967	202.974	24.4526	204.047
22.2208	152.925	21.151	56.2494	25.2036	186.11	24.4549	235.182
22.2216	74.1154	21.1537	84.5109	25.2431	140.941	24.4734	113.003
22.222	159.84	21.1542	116.312	25.2614	265.231	24.4884	253.848
22.2253	197.997	21.1597	138.629	25.2721	278.074	24.503	184.021
22.2268	68.2133	21.1613	144.867	25.2806	243.205	24.5212	178.324
22.2309	199.677	21.1637	120.699	25.2907	108.673	24.5242	184.508
22.2318	87.1405	21.1747	130.061	25.3051	130.966	24.5391	246.34
22.2341	110.058	21.1818	99.2769	25.3926	244.931	24.5443	193.569
22.2386	114.688	21.1923	86.5259	25.403	255.219	24.5574	161.27
22.2516	88.2121	21.2001	88.3213	25.4183	133.446	24.6201	279.184
22.2531	223.599	21.2031	139.14	25.4195	209.872	24.6228	1.10769
22.2547	108.091	21.2047	108.101	25.4209	221.699	24.631	152.536
22.256	133.226	21.2079	156.907	25.4302	391.93	24.6359	202.864
22.2593	106.62	21.2111	83.8125	25.4302	148.802	24.6926	83.0765
22.2597	79.4122	21.2136	74.339	25.4335	328.209	24.6946	186.787
22.2603	123.265	21.2174	127.544	25.4429	168.473	24.7038	163.103
22.2611	28.5025	21.2232	75.0522	25.4581	229.685	24.7376	155.559
22.2632	192.84	21.2249	124.085	25.4756	254.491	24.7825	242.225
22.2636	94.3768	21.2301	105.89	25.4977	230.975	24.7874	268.522
22.2679	54.884	21.2369	161.792	25.5118	144.379	24.7899	154.301
22.2728	134.062	21.2463	141.954	25.5349	359.214	24.8168	247.654
22.2739	200.722	21.2505	98.628	25.5381	249.446	24.8258	376.309
22.2746	80.3841	21.2518	98.5485	25.5446	271.247	24.8293	190.804
22.278	106.498	21.2539	97.6709	25.5614	213.137	24.8417	206.137
22.281	97.2318	21.2561	114.787	25.5646	117.293	24.8551	273.08
22.2884	115.449	21.2644	98.1727	25.5661	276.17	24.8561	110.705
22.2897	108.669	21.2661	173.389	25.5691	287.939	24.8702	260.701
22.2928	201.508	21.2677	193.799	25.6092	242.306	24.8768	172.568
22.2941	164.826	21.2708	220.399	25.6357	236.973	24.8822	109.009
22.3032	146.039	21.2864	119.443	25.6425	264.274	24.8822	96.1784
22.308	79.8288	21.2904	85.5026	25.6478	124.848	24.8855	198.939
22.3085	176.158	21.2967	163.73	25.652	238.77	24.9581	192.721
22.3096	153.744	21.2972	98.6535	25.6668	160.782	24.9775	209.933
22.3108	66.1536	21.3033	125.159	25.7028	250.573	24.989	266.407
22.3153	89.2171	21.3035	178.965	25.7094	235.662	24.9949	141.623
22.3156	60.9518	21.3051	153.515	25.7103	175.353	25.0036	229.083
22.3189	89.9812	21.3122	120.372	25.7482	219.951	25.017	144.376
22.3226	170.289	21.3237	159.197	25.7573	243.334	25.0267	249.371
22.3254	118.969	21.3264	118.56	25.7806	331.581	25.053	208.795
22.3265	113.041	21.333	169.771	25.7824	163.391	25.0531	186.24
22.3312	125.007	21.3334	100.617	25.7951	239.026	25.0554	204.412
22.3326	85.6512	21.3423	129.899	25.7959	205.182	25.0574	146.847
22.3333	39.2434	21.3442	91.8806	25.8009	324.696	25.058	269.025
22.3429	67.0222	21.3525	99.4593	25.8126	238.46	25.0599	201.9
22.344	74.5051	21.3541	135.968	25.8703	333.481	25.0672	506.861
22.3458	58.1458	21.3553	77.699	25.876	248.776	25.0941	185.06
22.3532	154.211	21.3733	108.687	25.877	223.782	25.0947	134.007
22.3577	93.7492	21.3795	239.241	25.925	205.123	25.1002	201.747
22.3608	120.518	21.3824	120.152	25.9371	318.882	25.1331	183.698
22.3627	107.682	21.3854	129.101	25.9669	190.213	25.1671	204.511
22.3629	87.3369	21.3859	90.1341	25.9804	215.642	25.1963	270.041
22.3673	69.8561	21.3891	130.715	25.9942	176.17	25.2356	194.384
22.368	117.17	21.3913	121.549	26.0068	226.906	25.2363	167.577
22.387	96.8348	21.3984	221.559	26.0261	308.095	25.2416	226.811
22.3871	82.2355	21.4019	80.6518	26.0294	149.369	25.2548	76.3652
22.3934	105.424	21.4027	88.0193	26.0393	276.518	25.2687	91.1581
22.3951	104.705	21.4041	81.2797	26.0583	215.038	25.2775	361.055
22.3957	90.0642	21.4056	123.658	26.0589	311.681	25.2972	142.414
22.3967	133.545	21.4078	190.549	26.0909	269.13	25.3091	180.267
22.4103	158.868	21.4078	145.743	26.1007	205.726	25.3222	249.439
22.4105	135.165	21.4112	124.107	26.1029	216.273	25.3426	218.53
22.4137	103.151	21.4163	87.2563	26.1046	197.801	25.3458	183.79
22.4145	108.495	21.4166	238.916	26.1201	374.393	25.399	217.129
22.4147	68.5702	21.4176	95.8311	26.1362	197.196	25.4071	292.304
22.416	94.1557	21.4236	91.2978	26.1696	382.95	25.4195	159.167
22.4212	86.8484	21.4277	65.9268	26.1711	205.79	25.4657	72.0595
22.4293	106.883	21.4348	105.84	26.1714	328.006	25.4713	168.976
22.4296	131.502	21.438	107.372	26.1901	669.95	25.4847	169.741
22.4359	78.328	21.4387	149.765	26.1906	183.428	25.4874	228.856
22.4368	179.011	21.4421	138.993	26.1987	208.327	25.5102	244.26
22.4435	145.095	21.4515	60.9069	26.2007	231.418	25.5296	141.18
22.4447	106.806	21.4569	91.7122	26.2376	183.756	25.5397	260.815
22.4455	124.124	21.4586	128.032	26.252	247.617	25.5477	261.892
22.4503	54.7425	21.4611	95.2345	26.254	191.135	25.5611	141.268
22.4529	68.9006	21.4673	100.439	26.2699	324.99	25.5686	175.945
22.4538	126.156	21.47	124.896	26.2863	317.167	25.5715	219.787
22.4544	90.6912	21.4821	100.429	26.3022	308.236	25.5893	162.842
22.4577	69.9815	21.4839	117.036	26.3037	232.04	25.5966	101.32
22.4618	115.982	21.4843	5.16071	26.3071	238.025	25.6065	183.797
22.4669	90.2558	21.4857	76.4466	26.3129	235.906	25.6075	199.816
22.4703	92.134	21.4858	104.922	26.3309	115.69	25.6168	191.454
22.471	171.481	21.4999	77.3333	26.3446	177.821	25.6367	210.297
22.473	69.6877	21.5082	129.859	26.3561	251.326	25.6389	100.649
22.4739	163.4	21.5094	109.077	26.3626	257.791	25.6635	137.859
22.474	62.6633	21.5121	106.297	26.3627	258.235	25.6845	208.733
22.4768	179.469	21.5164	115.188	26.3771	258.934	25.7138	188.235
22.4769	72.9374	21.5177	142.216	26.3839	211.097	25.7232	210.328
22.4777	97.8355	21.5193	139.408	26.4056	226.494	25.7373	167.516
22.482	92.5722	21.5217	165.416	26.4094	421.185	25.7729	220.065
22.4824	111.341	21.5254	172.222	26.4216	355.58	25.8209	169.88
22.4874	113.038	21.5305	121.256	26.4293	107.491	25.8475	156.182
22.4906	113.403	21.5315	73.9187	26.4512	384.863	25.9198	149.234
22.4919	117.067	21.5338	229.643	26.4564	192.548	25.9405	343.352
22.4921	84.8862	21.5348	78.1821	26.4573	291.351	25.9437	290.162
22.4925	123.337	21.5368	105.607	26.4619	265.369	25.9479	325.692
22.4934	101.421	21.5379	91.6404	26.4668	156.16	25.9734	251.707
22.4956	104.277	21.5426	166.639	26.476	169.916	25.978	112.528
22.5018	102.211	21.551	84.388	26.4948	207.37	26.0057	223.703
22.502	115.385	21.553	24.4761	26.4952	163.876	26.0075	143.472
22.5071	105.18	21.5582	129.102	26.5188	222.912	26.0106	242.417
22.5107	285.094	21.5705	108.404	26.5218	232.536	26.0291	126.747
22.5132	189.624	21.5793	134.706	26.5381	202.377	26.0294	212.686
22.5209	138.326	21.58	113.85	26.5549	299.591	26.0713	141.31
22.5246	69.6877	21.5801	95.9323	26.5685	207.547	26.0868	102.418
22.5258	100.409	21.5842	123.597	26.6048	240.728	26.0874	233.575
22.5319	125.13	21.5862	99.4762	26.6117	181.993	26.0942	294.868
22.5329	74.234	21.5909	164.043	26.6227	271.665	26.0954	274.547
22.5393	138.597	21.5945	166.71	26.6273	200.218	26.1258	146.128
22.5409	69.9905	21.5955	110.868	26.632	270.813	26.1285	180.096
22.5411	99.5348	21.6023	69.5227	26.6329	283.595	26.1386	230.737
22.5434	163.378	21.607	102.028	26.6383	162.688	26.1416	220.352
22.5446	50.9642	21.6085	84.5195	26.6506	350.707	26.1463	171.735
22.5466	131.781	21.6087	111.84	26.6659	224.958	26.15	143.801
22.5469	82.2691	21.6088	122.1	26.6852	239.924	26.1522	117.457
22.5469	92.0063	21.611	144.506	26.7037	288.401	26.1636	86.3152
22.5475	95.0348	21.6198	74.3821	26.707	242.817	26.1662	239.736
22.549	70.9666	21.6207	155.132	26.7117	186.379	26.1665	163.447
22.5494	94.9354	21.6236	112.558	26.7177	388.885	26.1709	294.515
22.5516	55.0371	21.626	188.211	26.7455	301.126	26.1724	165.989
22.5573	100.024	21.6279	60.2377	26.7654	262.009	26.1825	102.767
22.5615	86.3823	21.6429	76.6337	26.7743	206.234	26.1885	341.997
22.5675	106.41	21.6446	111.827	26.7816	312.958	26.1971	186.517
22.5731	150.021	21.6482	76.6197	26.7858	548.989	26.2044	200.25
22.5783	90.7248	21.6505	105.746	26.8025	214.085	26.2097	240.831
22.579	128.092	21.6576	134.922	26.8027	290.448	26.2308	221.824
22.5802	99.7532	21.6577	132.422	26.8161	51.7099	26.2542	230.173
22.5812	118.473	21.6661	102.965	26.823	252.46	26.2722	194.396
22.5815	203.252	21.6673	112.939	26.8297	170.932	26.2734	161.554
22.587	105.959	21.6694	101.641	26.8298	231.267	26.2976	130.985
22.595	113.637	21.67	149.096	26.8337	249.844	26.3026	90.0964
22.5959	74.0858	21.6761	177.816	26.8702	315.548	26.3028	146.199
22.5972	104.063	21.6769	85.8954	26.8853	272.177	26.3087	187.575
22.6004	92.838	21.6872	252.774	26.8934	220.8	26.3124	255.079
22.6017	96.2784	21.6927	144.3	26.8947	274.743	26.3146	234.289
22.6027	79.6267	21.6927	119.179	26.8985	285.566	26.3178	309.419
22.6042	100.308	21.7036	107.339	26.9016	1301.05	26.3222	78.9246
22.605	87.8298	21.7062	107.333	26.9127	260.602	26.3252	170.438
22.6057	117.126	21.7073	110.66	26.9352	225.194	26.3288	207.869
22.6073	126.709	21.7086	101.301	26.9376	192.221	26.3403	180.792
22.6096	114.426	21.7087	106.623	26.9401	196.448	26.3419	158.874
22.6097	71.2472	21.7125	128.497	26.9422	277.445	26.344	118.471
22.6102	51.7183	21.7139	154.678	26.9721	236.875	26.3448	142.623
22.6127	165.88	21.7163	103.08	26.9734	225.257	26.4026	217.26
22.6139	81.4904	21.7166	127.247	26.9892	245.731	26.4348	223.337
22.6174	98.6119	21.7226	96.0702	26.9923	280.248	26.4401	248.601
22.6176	125.553	21.7246	151.358	27.0251	226.668	26.4524	300.816
22.6212	125.468	21.727	75.3976	27.0287	206.273	26.4771	125.8
22.6213	115.611	21.7284	148.938	27.0641	110.848	26.4809	143.282
22.6302	75.7502	21.7314	191.108	27.0883	162.605	26.5023	316.939
22.6317	86.4771	21.7342	71.8294	27.0906	245.777	26.5085	137.592
22.6347	127.307	21.7374	94.6882	27.1077	275.661	26.5531	304.847
22.6349	82.0077	21.7429	104.222	27.1107	248.994	26.5533	231.545
22.6367	129.153	21.7515	116.303	27.1459	286.179	26.5536	179.697
22.6392	97.7206	21.7572	180.058	27.1478	262.864	26.5698	147.858
22.6505	166.78	21.7604	110.002	27.1562	271.65	26.5702	265.726
22.6507	113.647	21.7676	101.319	27.211	198.202	26.5721	156.904
22.6515	78.5061	21.7719	131.182	27.2178	206.943	26.5737	95.8248
22.6519	224.487	21.7802	105.896	27.2428	205.444	26.5832	240.214
22.654	95.2091	21.7805	192.921	27.2495	167.926	26.5879	218.574
22.6546	84.0009	21.7812	86.7581	27.2568	244.28	26.5985	177.832
22.6554	80.6878	21.7856	100.002	27.2608	134.121	26.6033	270.086
22.6562	120.259	21.7857	81.6048	27.2671	139.929	26.6206	184.23
22.6584	102.995	21.7882	103.862	27.2836	311.645	26.6447	157.561
22.6615	99.3182	21.7891	90.2209	27.2938	407.119	26.6471	164.598
22.6632	87.7219	21.7961	144.1	27.2955	217.259	26.6582	137.943
22.6636	193.392	21.7995	77.1671	27.3082	173.077	26.6657	318.936
22.6638	165.085	21.8003	102.957	27.3154	291.818	26.6743	157.731
22.6638	85.0011	21.8037	99.7177	27.3157	227.287	26.6779	124.088
22.6677	98.4153	21.8079	116.034	27.317	260.869	26.6904	198.312
22.6822	86.6875	21.8142	198.075	27.3265	252.28	26.6964	129.052
22.683	97.1069	21.8163	98.865	27.3484	163.162	26.6968	229.677
22.6901	96.2192	21.8167	124.356	27.3487	393.623	26.732	244.414
22.6902	93.2275	21.8188	145.72	27.3651	618.747	26.7517	280.081
22.6906	74.2018	21.8337	115.222	27.3716	224.347	26.7552	139.284
22.6912	103.404	21.8344	66.3285	27.3746	398.086	26.7639	120.755
22.6912	89.2106	21.8355	95.6722	27.3778	220.827	26.7852	202.803
22.6927	148.928	21.8366	124.569	27.3798	220.914	26.8075	211.905
22.6934	96.4835	21.8425	87.4314	27.3874	362.524	26.8114	257.502
22.6936	92.3185	21.8466	130.242	27.3926	204.71	26.8128	187.715
22.695	103.302	21.875	184.963	27.3927	182.971	26.8248	250.321
22.6968	82.4028	21.8768	99.3253	27.4103	288.239	26.8421	146.423
22.6969	88.7458	21.8779	104.845	27.4227	320.534	26.8436	212.077
22.6971	113.936	21.8829	77.615	27.425	216.004	26.8477	182.628
22.703	92.1672	21.8859	141.295	27.4304	214.153	26.853	123.662
22.7107	109.629	21.888	100.824	27.4386	287.769	26.8563	177.377
22.7125	117.627	21.8922	105.675	27.4392	174.43	26.8722	197.412
22.7191	115.78	21.8928	134.757	27.445	323.365	26.8809	60.0876
22.7203	142.776	21.8936	113.12	27.4812	218.451	26.9116	330.8
22.7229	86.089	21.8981	96.825	27.4911	157.596	26.9204	396.828
22.7238	125.152	21.8993	117.626	27.5262	173.268	26.9404	229.772
22.7257	114.873	21.8996	63.7094	27.5294	183.816	26.9787	181.251
22.7288	264.548	21.902	204.805	27.5573	205.446	27.026	379.693
22.7302	72.6563	21.9021	129.6	27.5629	165.025	27.0271	198.852
22.7306	72.4606	21.9076	143.208	27.569	190.857	27.0403	158.913
22.7322	94.1189	21.9076	114.159	27.5889	362.058	27.0692	232.824
22.7355	126.53	21.9114	124.563	27.6086	218.812	27.0829	149.653
22.7411	122.944	21.912	92.021	27.6227	433.827	27.0851	95.9076
22.7416	172.468	21.9144	95.9246	27.6268	340.138	27.091	208.306
22.7423	64.1395	21.9151	223.111	27.6865	702.076	27.0927	160.324
22.7434	82.7653	21.9172	134.743	27.6879	264.204	27.1019	238.42
22.7447	83.8823	21.9176	119.794	27.6929	121.469	27.1262	180.737
22.7452	446.787	21.9217	76.7026	27.6962	291.521	27.1567	216.099
22.7458	73.9657	21.9233	76.6549	27.6988	226.997	27.1697	126.886
22.7465	147.816	21.9245	142.358	27.7054	256.94	27.1721	311.305
22.7468	86.028	21.93	131.09	27.7084	128.503	27.1812	164.487
22.7493	139.831	21.9311	96.5045	27.7184	205.661	27.1827	325.411
22.7495	76.1461	21.9349	84.7782	27.7206	279.417	27.1965	245.552
22.7501	67.144	21.9367	167.749	27.7221	399.512	27.2048	230.782
22.7555	139.318	21.9412	109.728	27.7584	245.737	27.2053	185.016
22.7562	103.241	21.9418	75.0839	27.76	308.395	27.2224	167.284
22.7565	110.077	21.9424	76.294	27.7639	311.262	27.2276	134.35
22.7585	87.3126	21.9431	104.177	27.7809	179.857	27.2311	182.637
22.7627	136.581	21.9443	105.144	27.7892	285.489	27.2527	190.724
22.7627	113.959	21.9497	85.5923	27.7959	225.457	27.2618	174.575
22.7645	119.336	21.9517	108.956	27.8095	163.921	27.2656	144.834
22.7675	108.525	21.9528	115.758	27.8314	303.587	27.2715	179.834
22.77	165.071	21.9554	104.388	27.8349	36.7618	27.2845	127.256
22.7715	129.875	21.9565	113.564	27.8426	204.574	27.2871	239.636
22.7806	81.6593	21.9574	121.952	27.8487	266.011	27.3038	198.511
22.7826	114.766	21.9604	93.7448	27.857	140.218	27.3055	208.613
22.783	174.312	21.9608	83.1497	27.8777	215.44	27.3135	237.43
22.786	137.324	21.9696	117.623	27.8966	400.586	27.314	170.491
22.7865	182.546	21.9732	102.759	27.906	266.128	27.3167	214.13
22.789	110.299	21.9766	14.3538	27.9375	348.416	27.3167	233.515
22.7929	101.027	21.977	117.203	27.9545	231.444	27.3519	181.045
22.7932	105.528	21.9786	138.976	27.9756	205.126	27.3541	320.69
22.8012	97.6083	21.9791	88.7365	28.0045	308.338	27.3728	183.324
22.8033	135.403	21.9858	122.446	28.0118	292.521	27.3921	188.426
22.804	107.59	21.9863	108.161	28.0192	276.949	27.399	242.095
22.8044	74.6916	21.9868	86.3553	28.0288	199.356	27.4231	137.81
22.8063	153.416	21.9875	148.514	28.0476	144.168	27.4754	191.597
22.8069	115.31	21.9937	158.2	28.0713	455.476	27.5416	160.088
22.8104	187.117	21.9945	84.8588	28.0824	336.891	27.5421	229.332
22.8114	68.3726	21.9951	124.347	28.1018	403.875	27.5478	284.325
22.8132	83.4691	21.9981	90.3442	28.1321	337.592	27.5939	134.791
22.814	76.4556	21.9987	82.7401	28.1463	357.393	27.605	273.422
22.8177	117.067	21.9989	95.5853	28.1713	221.456	27.6203	248.091
22.8178	152.293	21.9994	63.6027	28.1803	292.355	27.6209	237.054
22.8211	87.9866	22.0021	85.9526	28.1916	541.867	27.6407	256.392
22.8223	180.731	22.0055	97.8521	28.1932	390.856	27.6429	324.303
22.8225	145.569	22.0067	144.339	28.2042	293.737	27.6575	273.533
22.8227	75.4952	22.0071	123.091	28.2208	105.525	27.6598	240.583
22.8246	86.9063	22.0148	106.241	28.243	82.2207	27.6662	250.331
22.8253	66.3202	22.0159	84.0442	28.2462	348.258	27.6804	212.495
22.8263	88.1932	22.0159	127.7	28.2476	169.279	27.6823	246.732
22.8293	91.6848	22.0166	123.363	28.266	299.788	27.6929	130.682
22.8301	153.545	22.0167	146.56	28.2762	197.434	27.6992	187.865
22.8311	63.5084	22.0182	101.057	28.2984	238.286	27.7062	132.066
22.8327	111.802	22.021	98.3623	28.3264	303.901	27.751	169.263
22.8351	300.279	22.0228	122.71	28.3654	184.549	27.7691	272.745
22.8366	89.144	22.0245	55.3972	28.3794	202.099	27.7861	248.783
22.8369	105.906	22.0266	77.9091	28.3807	418.345	27.8033	231.345
22.8414	120.291	22.0287	88.7163	28.3874	260.879	27.8151	218.325
22.8428	64.6112	22.0337	98.3915	28.404	196.553	27.8189	171.811
22.843	141.24	22.0341	99.6976	28.4072	276.352	27.8202	176.295
22.8446	126.479	22.0407	64.7028	28.4324	296.739	27.8226	211.467
22.8504	137.501	22.0434	123.248	28.4666	204.184	27.8294	237.216
22.8542	137.943	22.0437	136.027	28.4955	202.412	27.8404	184.054
22.8544	84.6191	22.0508	64.0043	28.5076	352.286	27.8615	150.306
22.8577	95.8536	22.0509	142.053	28.5198	286.835	27.8696	153.325
22.8582	120.447	22.051	129.197	28.5469	428.015	27.8747	138.52
22.863	142.421	22.0522	76.3459	28.5521	262.957	27.8787	162.466
22.8637	88.5013	22.0526	148.449	28.5621	261.03	27.8998	215.514
22.8644	140.694	22.0543	112.961	28.565	246.87	27.9292	39.3769
22.866	135.442	22.0587	104.65	28.5698	348.566	27.9467	193.927
22.8683	99.3278	22.062	101.197	28.5698	247.466	27.948	228.838
22.8688	130.6	22.0653	103.969	28.5818	242.271	27.9823	224.974
22.8693	134.35	22.0654	128.867	28.5877	353.464	28.0012	158.25
22.8708	147.343	22.0747	78.2597	28.6139	306.043	28.0037	172.645
22.8817	83.6693	22.0801	115.746	28.6153	300.902	28.0088	183.409
22.884	118.796	22.0917	111.8	28.6248	344.633	28.0186	207.096
22.8848	110.629	22.0921	132.217	28.6591	160.061	28.0445	216.653
22.8872	286.76	22.098	85.0095	28.6756	364.536	28.0579	181.084
22.8905	146.812	22.0986	72.254	28.684	276.506	28.0604	161.055
22.8909	176.597	22.0996	134.045	28.6999	175.67	28.0873	193.031
22.8914	97.6057	22.105	86.9441	28.7422	176.961	28.0927	113.969
22.8917	111.793	22.1101	91.8723	28.751	196.553	28.0942	185.622
22.8932	201.594	22.118	126.877	28.7623	169.291	28.0975	312.063
22.8932	125.116	22.1181	91.0075	28.7631	305.558	28.1201	143.947
22.8952	106.218	22.1184	98.1376	28.7671	260.397	28.123	186.895
22.8955	74.6906	22.1189	206.678	28.7717	319.529	28.1239	46.4567
22.8962	128.377	22.1229	97.1147	28.7769	155.136	28.1365	149.586
22.8998	87.6595	22.1274	67.9001	28.7772	355.15	28.1575	339.289
22.9008	64.1456	22.1327	131.29	28.7935	292.808	28.1766	204.597
22.9011	64.9065	22.137	131.917	28.7968	294.815	28.1864	198.803
22.9032	48.5643	22.1386	95.1066	28.8016	240.957	28.1936	268.314
22.9075	102.473	22.1391	96.4991	28.805	134.971	28.2075	172.111
22.9127	162.408	22.1422	104.248	28.8257	205.139	28.2334	353.941
22.9177	70.8537	22.146	86.5425	28.8843	295.008	28.2451	115.865
22.9183	78.0854	22.152	84.8819	28.9043	266.932	28.2528	138.576
22.92	124.462	22.1526	116.618	28.9164	269.403	28.256	234.744
22.92	87.6825	22.1577	129.335	28.9168	269.785	28.2951	306.452
22.9234	152.733	22.1583	108.345	28.9172	407.136	28.2984	215.461
22.9244	121.651	22.1629	172.506	28.9246	276.524	28.3144	205.224
22.9268	233.325	22.1729	91.0324	28.926	266.222	28.3228	293.685
22.9312	184.106	22.1792	143.793	28.9343	267.203	28.3341	207.956
22.9316	58.3686	22.1803	150.456	28.9397	294.754	28.3374	246.663
22.932	56.0772	22.1871	137.198	28.9506	230.446	28.3391	114.529
22.9328	233.283	22.1893	124.286	28.9523	253.333	28.3497	153.559
22.9339	85.8894	22.1933	114.624	28.9631	328.682	28.3512	282.988
22.9386	74.9449	22.1933	151.27	28.9692	285.346	28.365	198.442
22.9407	43.7613	22.1945	117.655	29.0111	314.587	28.3891	220.921
22.9415	105.716	22.1966	73.8989	29.0117	323.64	28.4174	194.422
22.9429	102.654	22.1989	107.402	29.0185	181.998	28.4192	295.782
22.9471	187.943	22.1996	74.4794	29.0579	526.059	28.4202	248.718
22.9482	129.985	22.208	108.82	29.0857	305.019	28.4272	211.762
22.9492	63.4855	22.2113	108.904	29.0868	549.854	28.4313	136.237
22.9498	104.087	22.2206	158.029	29.1062	343.94	28.474	145.326
22.95	180.191	22.2226	98.8634	29.1172	267.532	28.4745	261.086
22.9504	86.5917	22.2257	87.5768	29.1293	263.8	28.4823	357.498
22.9516	88.7615	22.2273	158.067	29.1535	140.338	28.522	161.206
22.9523	126.174	22.2339	163.187	29.1674	210.632	28.5491	255.207
22.9537	132.697	22.2358	108.517	29.1724	331.818	28.5659	182.131
22.954	167.056	22.2397	109.17	29.1822	115.594	28.6266	229.961
22.9559	147.937	22.2418	98.7779	29.1965	244.433	28.6348	210.329
22.9568	94.5978	22.2447	74.228	29.1966	323.003	28.6583	301.728
22.9583	91.3797	22.2472	251.274	29.2252	191.427	28.6617	218.425
22.9622	88.9835	22.2474	93.4879	29.2306	346.015	28.6636	264.006
22.9622	116.884	22.2491	90.7671	29.2498	198.057	28.6672	294.734
22.9629	82.834	22.2502	115.335	29.2651	252.928	28.7021	185.595
22.965	125.206	22.2516	197.356	29.2675	211.217	28.7179	224.569
22.9652	102.535	22.2527	93.617	29.3055	357.693	28.746	277.608
22.9697	111.951	22.2549	103.812	29.314	484.155	28.7559	141.173
22.97	196.308	22.2576	136.305	29.3207	407.94	28.7786	185.294
22.9701	148.809	22.2694	126.894	29.332	329.024	28.795	193.562
22.9708	80.1798	22.2738	129.29	29.335	317.777	28.797	328.61
22.9768	189.248	22.2767	129.579	29.3361	284.429	28.8908	165.828
22.9786	134.727	22.2848	71.0027	29.3371	229.931	28.8948	244.635
22.9796	83.642	22.2859	101.565	29.35	277.117	28.8985	193.702
22.9799	89.1784	22.2892	133.595	29.3667	207.934	28.8985	241.883
22.9804	187.178	22.2905	111.799	29.3978	283.843	28.9088	212.463
22.9806	107.196	22.2906	126.673	29.4073	159.639	28.9131	170.283
22.9824	79.9093	22.2921	119.377	29.415	196.74	28.934	158.881
22.9862	167.992	22.2935	98.4046	29.4188	628.882	28.9372	217.924
22.9877	118.136	22.2951	124.943	29.4306	308.197	28.9404	215.14
22.9891	60.9398	22.2965	133.428	29.4367	252.186	28.9824	300.59
22.9902	119.93	22.3001	148.386	29.4372	354.261	28.9906	475.492
22.9912	84.2473	22.3017	142.757	29.4567	294.764	28.9987	336.349
22.9917	109.929	22.3054	104.2	29.4639	303.729	29.0112	233.903
22.9939	152.203	22.3071	126.277	29.4713	326.647	29.0118	173.409
22.9947	136.351	22.3077	90.3054	29.482	254.993	29.0191	362.141
22.9948	165.335	22.3098	164.344	29.5065	379.746	29.0269	207.464
22.9948	161.868	22.3111	121.092	29.5093	366.301	29.0371	215.559
22.9956	66.7826	22.312	112.915	29.5184	373.192	29.0567	216.015
22.9965	118.394	22.3208	110.093	29.5208	325.829	29.0585	293.132
22.9979	92.9944	22.3218	71.113	29.5235	227.37	29.0841	397.046
22.9991	107.299	22.3226	127.657	29.5456	316.738	29.1048	198.466
23.0005	118.184	22.323	80.9202	29.5457	293.13	29.1232	168.642
23.0011	129.94	22.3337	153.198	29.5635	245.82	29.136	103.497
23.0015	156.59	22.343	79.2114	29.5859	352.651	29.1366	278.782
23.0016	102.925	22.3437	404.066	29.5935	369.412	29.1653	272.093
23.0016	117.744	22.347	207.846	29.5952	634.944	29.1836	147.394
23.0025	133.668	22.3564	86.2085	29.6036	262.116	29.1894	239.337
23.0048	87.9966	22.3588	190.909	29.6091	217.353	29.1933	214.438
23.0086	149.621	22.3601	113.741	29.6108	313.335	29.213	223.434
23.011	107.09	22.3621	122.496	29.6309	174.362	29.2144	146.616
23.011	90.1174	22.3645	148.527	29.6329	472.538	29.2189	194.087
23.0128	78.2714	22.365	104.512	29.6448	137.102	29.2271	196.878
23.0131	93.587	22.3651	239.781	29.6644	259.607	29.2312	205.77
23.0158	126.422	22.3661	140.828	29.6814	367.193	29.2386	73.954
23.0162	121.844	22.3667	158.268	29.6995	243.554	29.2418	270.667
23.0219	113.088	22.3694	109.555	29.6995	231.157	29.2499	360.185
23.0224	86.7896	22.37	99.3748	29.7208	185.002	29.2622	146.108
23.0239	94.8248	22.3725	119.79	29.7291	484.799	29.2847	195.869
23.0272	118.281	22.3726	74.1425	29.7339	387.27	29.2872	213.791
23.0276	127.009	22.3727	130.841	29.7408	444.885	29.2894	202.511
23.0293	123.564	22.373	111.151	29.7466	247.991	29.3064	242.156
23.0294	157.624	22.3752	135.37	29.749	221.677	29.3132	355.515
23.0295	77.1324	22.3769	128.573	29.7538	242.143	29.3142	217.139
23.0299	92.608	22.3786	156.964	29.7672	330.977	29.3328	296.429
23.0316	77.3385	22.3809	104.341	29.7787	214.639	29.3394	207.687
23.0345	111.189	22.3824	96.7567	29.7856	213.977	29.3449	255.907
23.0346	119.522	22.3835	164.078	29.7957	400.019	29.3497	270.817
23.0371	175.107	22.3871	89.2168	29.7988	244.018	29.3572	275.179
23.0383	109.252	22.3881	119.652	29.8053	351.662	29.3602	262.059
23.0415	123.856	22.389	175.295	29.8064	190.247	29.3842	134.91
23.0418	94.5742	22.3891	163.958	29.8152	324.757	29.3872	238.41
23.0421	106.876	22.3893	81.8989	29.8159	291.744	29.454	171.105
23.0433	70.9844	22.3902	102.743	29.8204	176.439	29.4724	300.479
23.0441	81.4482	22.3944	121.424	29.8271	158.317	29.474	337.659
23.0447	80.3029	22.3948	95.6342	29.8333	471.98	29.4744	195.152
23.0471	105.771	22.395	120.407	29.8446	301.365	29.4901	237.647
23.0493	124.972	22.3979	154.744	29.8532	383.509	29.4957	248.072
23.05	137.127	22.3983	116.007	29.8634	536.426	29.5199	85.2008
23.0502	88.1025	22.4002	89.3534	29.8683	315.105	29.5874	358.49
23.0503	96.0887	22.4019	82.215	29.8846	177.65	29.6303	249.804
23.0509	167.807	22.4023	73.8295	29.9003	191.931	29.6349	345.056
23.0545	118.207	22.4051	107.157	29.9377	412.471	29.6394	244.416
23.0575	98.1062	22.4052	137.558	29.9385	262.705	29.6616	292.157
23.06	70.265	22.406	153.707	29.9393	302.43	29.6771	206.41
23.0615	124.467	22.4092	60.2761	29.9624	444.926	29.6877	173.355
23.0618	179.01	22.4101	83.1236	29.9818	498.579	29.7285	243.152
23.0636	255.018	22.4102	98.4428	29.9833	307.346	29.7312	166.616
23.0656	107.281	22.417	100.067	29.9904	297.847	29.7402	145.079
23.0731	111.343	22.4209	170.305	29.9908	315.709	29.7439	201.258
23.0732	128.778	22.4237	105.342	29.9972	185.871	29.7674	170.81
23.0739	159.672	22.4246	99.8915	30.0058	225.417	29.7737	238.703
23.0743	145.482	22.4251	99.7249	30.0086	281.237	29.7777	258.015
23.0768	66.0953	22.4314	100.427	30.0231	369.511	29.7944	335.141
23.0785	86.1266	22.4324	153.578	30.0393	230.694	29.7962	282.331
23.0787	178.682	22.4355	116.741	30.0421	358.426	29.8032	155.4
23.0789	138.148	22.4381	105.513	30.0604	148.691	29.8416	346.356
23.0831	159.963	22.4393	79.0911	30.0674	262.571	29.8442	355.346
23.0844	141.406	22.4397	101.752	30.0696	259.817	29.8451	184.298
23.0856	93.6981	22.4412	84.5576	30.0824	300.969	29.849	249.05
23.0893	89.2277	22.4472	106.662	30.1131	193.709	29.8538	192.693
23.0916	149.47	22.4525	69.5411	30.1182	475.288	29.8548	211.206
23.0939	86.0878	22.4531	126.595	30.1564	217.725	29.8618	200.442
23.094	148.509	22.4615	125.769	30.1602	201.377	29.8649	317.164
23.0985	142.872	22.4617	104.68	30.1631	264.332	29.8692	333.754
23.1028	112.646	22.463	158.211	30.1762	324.077	29.8714	118.111
23.1053	147.138	22.4636	118.603	30.1809	294.667	29.8742	206.387
23.1056	313.453	22.4663	70.9024	30.1932	207.699	29.8833	239.947
23.1065	96.646	22.4799	113.506	30.2004	251.212	29.9199	107.119
23.1099	93.5255	22.4804	80.3897	30.2165	116.332	29.9266	244.791
23.1104	110.92	22.4817	62.4505	30.2274	366.839	29.9503	113.222
23.112	172.224	22.4926	196.76	30.2279	276.437	29.9507	489.744
23.112	64.4194	22.4951	114.477	30.2418	238.748	29.9914	122.516
23.1149	131.471	22.4973	133.35	30.2464	332.655	30.0061	316.248
23.1154	140.969	22.4991	66.3643	30.2466	305.66	30.0462	127.079
23.1189	113.238	22.5022	80.8317	30.2603	232.759	30.0642	165.58
23.1209	156.786	22.5036	119.983	30.2837	220.715	30.0711	309.336
23.1233	98.0811	22.5044	170.344	30.2879	381.071	30.0839	303.665
23.1243	149.459	22.5066	104.444	30.2972	351.484	30.087	274.453
23.1257	129.503	22.5074	68.6906	30.3037	327.443	30.0933	188.656
23.1284	66.4722	22.5078	143.346	30.3306	311.053	30.097	228.866
23.1305	120.12	22.509	82.4571	30.3404	414.174	30.0991	398.34
23.1315	176.224	22.5095	74.2741	30.3805	336.124	30.1316	238.675
23.132	107.419	22.5124	143.484	30.3916	339.521	30.1433	219.913
23.1324	68.6402	22.5129	65.8216	30.4021	373.028	30.1659	311.463
23.1324	72.0513	22.5135	122.64	30.4168	424.788	30.1765	261.31
23.1326	150.195	22.5198	89.2741	30.4173	414.32	30.2268	300.563
23.1353	80.9001	22.5198	107.296	30.433	261.935	30.2278	315.819
23.1384	92.0678	22.5216	181.149	30.462	445.122	30.2282	270.252
23.1401	199.399	22.5269	102.365	30.4793	129.588	30.23	196.212
23.1429	108.982	22.5349	115.515	30.4979	157.079	30.2304	116.335
23.1451	182.022	22.5369	219.806	30.5154	304.874	30.2606	51.2484
23.1483	152.533	22.5416	121.072	30.543	149.645	30.2774	185.747
23.149	182.161	22.5419	87.3719	30.5666	186.38	30.2953	276.112
23.1495	134.402	22.5423	96.9815	30.5754	273.344	30.2957	182.073
23.1508	69.6426	22.5432	70.0067	30.6361	274.19	30.2973	497.138
23.1519	171.667	22.5459	127.484	30.6704	300.552	30.2986	211.263
23.1542	123.617	22.5495	70.7373	30.673	257.419	30.311	202.192
23.1543	59.7767	22.5544	70.4674	30.7011	315.776	30.323	326.943
23.1574	106.196	22.5557	71.686	30.7165	290.222	30.3283	281.011
23.1581	118.907	22.5563	101.368	30.7297	173.483	30.3286	261.371
23.159	140.892	22.5577	90.1178	30.73	283.358	30.3424	391.679
23.159	24.6228	22.558	189.582	30.7306	380.617	30.369	195.802
23.1611	33.3492	22.5592	116.882	30.7368	452.738	30.3967	419.172
23.1619	109.857	22.5626	158.364	30.7531	311.938	30.403	264.816
23.1624	294.253	22.5661	103.655	30.7598	444.212	30.4066	150.54
23.1645	112.858	22.5665	104.984	30.7669	393.585	30.4244	181.496
23.1653	166.971	22.5677	87.556	30.7823	292.365	30.4259	186.586
23.1654	125.933	22.573	103.456	30.7921	971.523	30.4264	353.034
23.1667	109.985	22.5791	105.42	30.8092	303.931	30.4331	207.149
23.1679	152.24	22.581	95.3902	30.8195	229.348	30.447	283.702
23.1683	101.025	22.5841	95.8549	30.8365	372.066	30.4582	190.378
23.169	38.4878	22.5843	141.887	30.8378	273.771	30.484	220.231
23.17	147.583	22.5918	117.216	30.8409	391.521	30.5088	285.645
23.1702	179.903	22.5925	72.9192	30.8459	384.931	30.5121	382.795
23.1718	89.1806	22.5928	130.41	30.8583	341.192	30.5368	278.962
23.1735	143.668	22.5936	125.813	30.8615	241.278	30.5411	222.169
23.1745	156.315	22.5945	104.561	30.8636	238.602	30.5547	108.244
23.1753	243.605	22.5947	157.591	30.8656	235.177	30.5768	489.183
23.1756	55.8908	22.603	125.961	30.8793	152.735	30.5932	291.601
23.176	75.5685	22.6035	115.135	30.9261	264.618	30.5993	149.708
23.1765	59.7554	22.6037	71.1446	30.9264	495.621	30.6444	197.02
23.1766	89.6921	22.6049	132.68	30.9729	294.223	30.6606	184.02
23.1775	169.851	22.6145	116.067	30.9813	305.339	30.6882	314.886
23.1818	65.3957	22.6187	104.741	30.9858	281.434	30.7128	213.65
23.1839	103.373	22.6217	182.999	30.9989	844.733	30.7225	301.216
23.1863	88.9339	22.6222	132.63	31.0062	198.23	30.732	333.711
23.188	68.4694	22.6246	81.9244	31.0152	404.289	30.7607	217.856
23.1896	147.878	22.6247	134.155	31.0169	258.405	30.7966	197.372
23.1925	146.888	22.6269	102.03	31.0192	470.788	30.8033	177.23
23.1937	195.276	22.6278	140.035	31.0302	301.475	30.8101	289.927
23.195	77.9043	22.6293	146.539	31.0491	282.653	30.8549	267.674
23.1951	132.578	22.6298	160.315	31.0603	250.981	30.9069	447.04
23.1952	61.5572	22.6323	90.2728	31.0658	283.598	30.9132	398.502
23.1965	94.2044	22.636	101.299	31.0663	284.181	30.9323	304.194
23.1977	112.147	22.6389	123.503	31.0691	313.007	30.9467	222
23.1986	110.841	22.6394	67.4342	31.1177	271.08	30.9607	218.145
23.1997	90.7055	22.6412	145.66	31.1186	305.059	30.974	153.025
23.2002	104.202	22.6418	101.937	31.121	494.006	30.9778	205.099
23.2008	97.1631	22.6436	96.3443	31.1248	305.311	30.9867	227.088
23.2026	127.323	22.6469	70.949	31.1296	302.077	30.9911	303.218
23.203	101.936	22.6495	113.541	31.1348	404.097	30.9942	205.301
23.204	98.8809	22.654	110.416	31.1812	265.293	31.0015	219.12
23.2041	104.584	22.656	130.818	31.1893	249.403	31.0107	403.981
23.2043	96.9802	22.6619	94.1786	31.1914	397.183	31.0111	227.764
23.2059	106.874	22.6652	153.229	31.1983	194.649	31.0446	278.109
23.2064	105.458	22.6655	93.2078	31.1986	311.666	31.0594	313.11
23.2064	77.4685	22.6715	92.0073	31.1993	390.174	31.0621	293.019
23.2081	77.4302	22.6736	100.176	31.2	288.641	31.0666	197.85
23.2083	121.433	22.6749	70.5785	31.2012	288.004	31.1201	312.662
23.2086	114.635	22.6765	185.821	31.215	280.925	31.1294	178.461
23.211	98.5029	22.6773	151.679	31.2202	265.381	31.1591	229.629
23.2118	196.236	22.6782	74.9662	31.2267	222.487	31.1721	286.636
23.2146	86.1848	22.6795	137.093	31.2364	374.587	31.1831	309.193
23.2149	101.586	22.6797	86.2531	31.2395	324.902	31.1887	362.975
23.2159	71.5958	22.6808	130.085	31.254	286.299	31.2008	257.003
23.2196	83.1257	22.6813	104.539	31.2564	221.668	31.2486	212.273
23.2203	156.542	22.6862	121.456	31.2581	291.61	31.2487	282.169
23.2212	113.455	22.6869	154.272	31.2821	473.423	31.2574	300.755
23.2214	113.628	22.6876	139.664	31.2926	362.26	31.2607	321.5
23.2234	104.006	22.6877	110.081	31.2983	300.249	31.2716	182.108
23.2246	169.895	22.688	158.338	31.3151	239.593	31.2898	225.015
23.2253	158.433	22.69	102.791	31.316	419.891	31.2916	341.606
23.2263	134.742	22.6938	114.642	31.3163	370.353	31.3156	201.055
23.2276	194.733	22.6974	120.671	31.3328	332.667	31.3362	251.554
23.2279	150.708	22.6978	145.367	31.3395	466.468	31.34	269.924
23.2315	97.0127	22.7007	109.565	31.3397	347.817	31.3408	250.591
23.2326	159.772	22.7018	151.648	31.3726	319.998	31.3493	294.411
23.2334	126.093	22.7032	146.628	31.3822	193.093	31.3506	200.861
23.2357	70.5807	22.7043	137.275	31.3868	284.02	31.3643	274.111
23.237	84.23	22.705	123.824	31.3894	287.373	31.3779	266.189
23.2387	83.9459	22.706	88.8606	31.391	434.45	31.3884	284.998
23.2416	186.942	22.709	167.014	31.4061	421.054	31.4321	162.593
23.2431	107.48	22.7116	78.5444	31.4172	385.811	31.4567	208.596
23.2448	90.5832	22.7125	93.0366	31.4216	338.277	31.4694	231.376
23.2449	232.793	22.7187	94.284	31.4232	252.619	31.4803	225.248
23.2477	151.633	22.7207	193.373	31.4471	326.988	31.4865	312.221
23.2478	177.087	22.7222	100.976	31.4633	222.814	31.5086	179.811
23.248	125.765	22.7228	118.935	31.5371	299.902	31.5371	140.7
23.2481	326.346	22.7236	150.48	31.5763	291.169	31.5515	214.875
23.2492	85.0065	22.7246	158.699	31.5841	326.094	31.5595	304.865
23.2493	74.7358	22.7265	84.8091	31.5975	196.178	31.5637	221.424
23.2534	116.264	22.7272	92.3182	31.6462	380.223	31.5882	306.235
23.2551	107.888	22.7386	181.529	31.6468	329.212	31.596	383.887
23.2562	129.155	22.7416	157.952	31.6587	284.509	31.6243	430.33
23.2568	109.651	22.7455	96.1781	31.6802	162.007	31.6244	150.953
23.2576	209.674	22.7502	96.2456	31.6808	275.907	31.6309	180.528
23.2622	143.655	22.7503	146.326	31.6969	283.435	31.6357	257.078
23.264	238.987	22.7528	110.735	31.7012	151.969	31.6678	370.999
23.2647	161.28	22.755	93.0439	31.7045	243.609	31.7217	202.25
23.2648	87.3671	22.757	96.558	31.724	358.783	31.7337	290.649
23.2666	113.621	22.7592	79.03	31.7248	325.355	31.7351	465.886
23.2666	148.337	22.7592	111.77	31.726	451.666	31.7409	206.875
23.2669	147.608	22.7623	119.439	31.7307	342.869	31.7545	120.532
23.267	106.175	22.7703	222.243	31.7317	211.52	31.7635	244.289
23.2676	88.8461	22.7728	177.555	31.7385	361.466	31.7738	177.726
23.2688	129.298	22.7736	103.749	31.7417	155.325	31.7758	249.536
23.2691	182.79	22.7736	132.346	31.7705	333.601	31.7899	305.7
23.2704	126.301	22.776	73.7196	31.7897	416.764	31.8131	99.6666
23.2708	71.1874	22.7791	149.613	31.7924	469.804	31.8223	396.169
23.2708	176.158	22.7829	94.0649	31.7951	376.394	31.8642	198.523
23.2748	120.249	22.7884	67.0562	31.8115	328.299	31.8663	179.444
23.2754	51.791	22.791	190.455	31.8481	401.754	31.8883	291.988
23.2763	70.8583	22.7912	115.707	31.859	216.92	31.8965	144.487
23.277	168.729	22.7952	118.707	31.8593	286.5	31.9066	210.652
23.2781	112.535	22.7962	111.77	31.8679	238.726	31.9446	134.823
23.2781	152.594	22.7968	151.783	31.8736	252.253	31.9809	207.681
23.2783	94.644	22.8002	213.311	31.8864	152.497	31.9809	323.778
23.2807	127.334	22.8026	72.7189	31.8958	300.432	31.9812	310.857
23.2824	122.619	22.8065	185.073	31.8996	324.706	31.9837	328.99
23.2832	166.675	22.8065	114.597	31.9093	268.229	31.997	185.316
23.2864	154.194	22.8137	177.692	31.9165	407.771	32.0302	194.493
23.2885	87.9932	22.8147	166.969	31.9228	481.842	32.0302	257.919
23.29	152.519	22.8156	77.7058	31.9326	267.952	32.0358	313.763
23.2948	80.2324	22.8157	88.3435	31.9396	336.997	32.068	248.53
23.2992	148.989	22.8173	128.263	31.9406	353.891	32.1032	222.509
23.2998	162.799	22.8182	108.855	31.9478	235.794	32.1195	191.974
23.3014	151.289	22.8194	85.3995	31.9566	307.089	32.1348	244.435
23.3065	121.833	22.8205	114.472	31.9686	366.69	32.2009	177.375
23.3095	83.8501	22.8267	76.638	31.9697	249.837	32.2122	276.164
23.3098	197.144	22.8274	96.276	31.9766	407.71	32.2221	226.1
23.3122	71.918	22.8308	141.758	31.9975	317	32.2551	401.529
23.3129	108.45	22.8309	131.074	32.0035	400.449	32.2878	255.666
23.3142	86.0748	22.831	131.89	32.0127	398.841	32.3107	306.431
23.3149	121.461	22.8338	102.774	32.0465	279.523	32.3363	341.956
23.315	158.444	22.8355	71.9695	32.0496	193.44	32.3689	269.633
23.3168	71.6382	22.8365	99.883	32.0559	391.224	32.4029	261.867
23.3181	79.2847	22.8401	132.386	32.0658	311.239	32.4148	297.196
23.3207	126.779	22.8421	54.7174	32.083	232.005	32.4256	234.502
23.3208	231.988	22.8475	75.223	32.0965	251.574	32.4357	35.2525
23.3264	133.976	22.8482	82.2327	32.1036	241.142	32.4513	399.196
23.3273	109.744	22.8516	109.577	32.1805	333.072	32.4565	238.657
23.3275	101.52	22.8564	98.6002	32.1904	204.239	32.4652	291.151
23.328	78.7089	22.8571	144.169	32.1933	498.923	32.4813	273.299
23.3322	79.2094	22.8581	82.4452	32.1979	262.189	32.4911	291.757
23.333	145.933	22.8595	187.564	32.2218	358.495	32.5032	305.804
23.3336	77.7057	22.8655	90.4905	32.2577	274.303	32.5274	217.82
23.3342	127.135	22.8665	130.151	32.2578	305.88	32.5405	268.376
23.3359	143.254	22.8673	149.784	32.277	151.543	32.5721	188.897
23.3361	225.317	22.8723	94.977	32.2949	267.823	32.5745	176.286
23.3362	62.5448	22.8728	120.256	32.3087	489.797	32.5807	188.846
23.3366	131.05	22.8779	75.2999	32.3236	252.881	32.5993	311.037
23.3373	103.856	22.8799	91.3473	32.3238	473.978	32.6051	411.608
23.3394	142.942	22.881	94.5283	32.3258	209.979	32.6352	198.146
23.3416	160.002	22.8815	186.069	32.3524	504.533	32.6498	370.715
23.3454	145.727	22.8817	123.039	32.3673	311.915	32.6639	288.084
23.3464	136.211	22.8818	124.016	32.3677	349.598	32.6716	288.59
23.3508	108.62	22.8826	126.479	32.3718	449.147	32.7333	298.408
23.3523	123.611	22.8829	138.567	32.4213	439.835	32.7384	327.139
23.3545	125.707	22.8834	101.286	32.434	541.882	32.743	356.361
23.3556	178.863	22.8855	129.041	32.4359	270.099	32.7871	289.479
23.3565	212.265	22.8888	90.4198	32.4361	308.098	32.7906	229.154
23.3568	101.126	22.8895	112.767	32.4606	317.646	32.7944	308.511
23.3575	102.329	22.8972	142.882	32.4776	333.153	32.7974	227.921
23.3599	95.5526	22.898	74.2717	32.5001	378.055	32.8116	346.751
23.36	99.1272	22.8981	121.112	32.51	302.844	32.814	237.983
23.3634	130.491	22.9007	153.721	32.5129	357.784	32.8161	263.175
23.3684	112.435	22.9014	118.28	32.5341	696.175	32.8268	474.545
23.3688	101.083	22.9031	93.2736	32.5426	293.88	32.8294	156.372
23.3786	127.99	22.9042	124.235	32.5786	284.267	32.8343	274.1
23.3798	136.999	22.9052	105.265	32.5989	214.664	32.8436	284.333
23.3816	141.45	22.9076	132.226	32.6077	202.411	32.8754	351.518
23.3847	200.169	22.9089	159.102	32.611	205.494	32.8892	291.17
23.3869	135.067	22.9111	122.406	32.6289	258.917	32.9131	184.615
23.3883	99.875	22.915	112.473	32.6333	447.041	32.9182	326.029
23.3901	134.439	22.9168	145.079	32.6545	231.029	32.9581	312.154
23.3932	133.73	22.9172	81.4354	32.6555	227.827	32.9615	262.327
23.3932	140.571	22.919	100.81	32.6611	307.484	32.9688	197.97
23.3948	149.928	22.9204	165.877	32.6776	226.177	32.9737	219.789
23.3979	135.995	22.926	145.968	32.6803	358.592	32.974	317.515
23.3983	115.434	22.9265	111.727	32.7098	371.318	32.9762	317.728
23.3996	107.352	22.9357	161.814	32.749	286.972	32.9956	357.407
23.3999	128.19	22.942	89.9217	32.7531	299.754	33.0063	180.752
23.4002	143.586	22.9433	172.534	32.7899	280.911	33.023	385.717
23.4008	138.77	22.9558	129.031	32.7909	260.894	33.0661	257.387
23.4015	110.501	22.9562	151.496	32.7955	228.139	33.0671	208.127
23.4021	110.706	22.9572	82.076	32.8023	297.317	33.12	203.943
23.4036	123.475	22.96	99.9946	32.8052	421.231	33.1203	326.694
23.4063	88.9165	22.9613	95.2242	32.8075	281.474	33.1228	306.827
23.4102	126.051	22.964	202.604	32.8098	202.752	33.146	194.835
23.4106	88.5532	22.9653	139.615	32.8392	258.999	33.1835	283.385
23.4151	97.3161	22.9663	139.237	32.8395	362.479	33.2183	185.853
23.4174	81.2421	22.9664	109.55	32.8523	170.887	33.225	393.605
23.4178	70.9839	22.9699	230.714	32.8535	316.041	33.2377	493.336
23.422	125.418	22.9709	122.438	32.8786	353.976	33.2482	275.028
23.4245	116.986	22.9791	87.7926	32.8805	420.922	33.2483	192.55
23.4245	136.506	22.9829	108.686	32.8817	344.805	33.2675	206.674
23.4253	155.609	22.9837	130.655	32.8916	348.687	33.2816	264.335
23.426	118.614	22.9845	117.799	32.8949	299.009	33.2955	379.236
23.4261	155.575	22.9851	115.037	32.8959	453.277	33.3042	259.197
23.4302	88.2211	22.9859	140.839	32.9196	348.376	33.3131	284.073
23.4305	125.392	22.9892	100.19	32.9361	147.298	33.3476	231.183
23.4305	145.623	22.9914	92.6583	32.9483	197.287	33.3642	95.2823
23.4319	108.201	22.9916	118.573	32.9641	323.395	33.3884	197.764
23.4342	181.916	22.9952	160.582	32.9732	364.895	33.412	284.667
23.4343	125.81	22.9973	154.256	32.9839	386.494	33.4201	399.984
23.4348	181.15	22.9993	125.743	33.0132	686.042	33.4268	486.171
23.4358	112.812	23.0052	125.563	33.0224	264.366	33.4462	315.909
23.4358	80.3746	23.0056	203.356	33.0398	256.395	33.4491	354.695
23.4426	58.2475	23.0056	127.955	33.0797	221.973	33.4529	381.542
23.4443	121.708	23.0065	139.934	33.082	329.952	33.458	265.188
23.4444	253.192	23.0068	167.223	33.0882	245.127	33.4593	203.786
23.4445	74.562	23.0083	70.8773	33.0895	346.378	33.4759	307.538
23.4457	103.194	23.0095	91.7983	33.1077	135.539	33.4892	335.359
23.4485	159.112	23.0166	129.335	33.1317	231.831	33.5053	386.225
23.4489	117.814	23.017	115.124	33.1512	340.866	33.5109	182.108
23.4502	136.943	23.0242	84.2654	33.1592	307.692	33.5143	275.514
23.4514	69.8438	23.0242	138.303	33.1847	296.056	33.5287	237.091
23.4531	123.783	23.0243	105.039	33.2228	554.95	33.5464	294.554
23.4543	178.234	23.0247	112.266	33.2373	246.705	33.6368	276.144
23.4548	90.805	23.0247	78.7814	33.2375	279.199	33.6397	338.423
23.455	89.8945	23.029	94.2889	33.2634	232.735	33.6546	279.508
23.4604	100.431	23.0335	178.218	33.2853	288.229	33.6588	347.17
23.4648	148.804	23.0408	373.152	33.3881	371.726	33.67	372.603
23.4653	148.164	23.0414	125.746	33.3925	329.654	33.6708	346.32
23.467	125.67	23.0436	175.321	33.4734	265.799	33.7406	310.45
23.4672	107.344	23.0479	163.79	33.4829	402.307	33.7667	293.507
23.4687	133.537	23.0489	209.153	33.4838	388.525	33.7804	242.523
23.4721	87.0746	23.0576	85.1015	33.4896	315.018	33.7973	181.992
23.476	136.945	23.0581	78.1544	33.5074	236.234	33.8144	291.506
23.4788	183.507	23.06	100.245	33.5097	310.035	33.8252	258.802
23.4799	142.269	23.0613	132.674	33.5111	250.482	33.8299	50.7196
23.4803	116.175	23.0661	241.979	33.5785	360.075	33.8443	245.339
23.4804	119.236	23.0723	94.8921	33.5982	302.07	33.8703	233.679
23.4812	97.761	23.0727	108.683	33.6154	344.85	33.8715	292.078
23.4832	150.73	23.0727	139.785	33.6163	284.496	33.8916	190.584
23.4836	106.387	23.0763	76.8307	33.6227	213.853	33.9005	395.236
23.4836	126.761	23.0768	118.916	33.6301	263.137	33.9079	172.127
23.4843	116.256	23.0786	82.18	33.6309	388.848	33.9196	226.871
23.4858	81.6603	23.0843	102.138	33.7119	302.951	33.9362	252.396
23.4867	164.578	23.0847	120.758	33.7532	474.38	33.9453	352.948
23.4871	182.216	23.0856	201.557	33.7536	255.423	33.9657	226.492
23.4872	87.8323	23.0857	169.82	33.7786	339.587	33.9664	403.732
23.4882	292.268	23.0865	84.9293	33.7822	285.759	34.0017	258.632
23.4932	135.355	23.087	99.1809	33.8129	351.008	34.02	225.607
23.4935	66.8729	23.0878	81.1351	33.8176	259.869	34.0381	235.344
23.4937	119.597	23.0909	185.527	33.8193	352.524	34.0639	339.063
23.494	153.21	23.0913	151.627	33.8367	317.395	34.0859	162.915
23.4959	95.5265	23.0954	123.118	33.8412	329.444	34.0957	323.546
23.4962	198.073	23.098	85.7433	33.8485	347.653	34.1111	276.073
23.4966	67.1193	23.1001	98.2257	33.8547	279.94	34.1119	225.953
23.4977	113.633	23.1064	217.078	33.8718	363.621	34.1166	295.894
23.4979	170.602	23.1106	201.06	33.8755	316.01	34.1504	245.121
23.4998	104.783	23.1143	93.0717	33.9	359.445	34.162	276.193
23.5045	159.231	23.1179	99.6265	33.9053	531.695	34.1814	165.762
23.5087	185.163	23.118	127.355	33.9074	277.081	34.1904	376.731
23.5099	83.7885	23.1185	201.78	33.9173	353.617	34.2066	365.093
23.5116	114.078	23.1201	113.216	33.956	350.262	34.2174	366.988
23.5122	95.7042	23.1233	65.7482	33.9812	309.694	34.2432	288.852
23.5132	92.2815	23.1234	135.801	34.0236	318.411	34.3102	302.172
23.516	143.438	23.1235	98.3688	34.0251	284.626	34.3347	302.191
23.517	86.9751	23.1257	127.191	34.0406	398.468	34.3701	331.203
23.5175	82.9778	23.1259	97.5787	34.0432	385.787	34.3887	170.445
23.5179	143.867	23.1305	77.6363	34.0568	216.099	34.4227	11.6392
23.5181	106.66	23.1309	176.921	34.0623	255.033	34.4364	214.414
23.5215	98.2297	23.1322	95.0862	34.0692	430.059	34.4497	250.402
23.5232	137.231	23.1355	108.086	34.0728	278.634	34.5533	428.679
23.5253	231.699	23.1355	111.738	34.0884	409.813	34.5591	164.494
23.5282	69.893	23.1408	124.063	34.092	213.41	34.6191	436.362
23.5297	155.219	23.1409	105.457	34.1074	422.063	34.6205	290.898
23.531	137.415	23.1495	124.501	34.116	391.265	34.6865	395.895
23.531	107.005	23.15	124.486	34.1245	268.304	34.6908	308.978
23.5311	154.903	23.1502	143.466	34.1535	328.452	34.7614	333.263
23.5326	158.555	23.1507	149.019	34.1551	339.375	34.7776	459.731
23.5343	176.402	23.1517	96.8944	34.1579	561.264	34.7997	301.8
23.5347	111.715	23.1572	128.942	34.1979	288.164	34.8066	267.329
23.5404	99.2765	23.1578	91.9685	34.2152	252.785	34.8526	313.485
23.5411	103.018	23.1609	110.146	34.2231	279.209	34.8576	233.556
23.5416	126.833	23.1611	107.255	34.226	362.774	34.862	282.351
23.5416	115.614	23.1654	94.0104	34.2312	303.534	34.8725	489.343
23.5459	135.016	23.1659	140.708	34.2331	281.644	34.8732	500.425
23.5467	145.616	23.1659	110.163	34.2366	281.595	34.8891	420.39
23.5476	83.5889	23.1668	114.499	34.2414	407.683	34.8938	134.004
23.5498	158.712	23.1676	145.015	34.2474	263.235	34.9548	269.017
23.5502	157.885	23.1708	113.074	34.2545	313.711	34.957	327.523
23.5512	104.159	23.1761	179.749	34.2552	416.403	34.9772	384.274
23.5526	101.498	23.1788	95.4413	34.2589	303.384	34.9825	338.359
23.5538	130.536	23.1846	169.229	34.2766	267.212	35.0177	345.908
23.5539	149.873	23.1887	107.56	34.2811	312.714	35.0209	289.334
23.5542	113.817	23.1905	109.425	34.3045	330.529	35.0397	324.584
23.5558	177.486	23.1908	78.1974	34.3076	299.971	35.0451	334.279
23.559	71.3419	23.1911	107.854	34.3177	365.43	35.0474	387.844
23.5596	93.0975	23.1914	101.822	34.3177	271.266	35.0637	355.131
23.5616	199.6	23.1925	140.184	34.3506	284.17	35.0699	187.351
23.5623	70.5246	23.1936	72.193	34.443	469.502	35.124	205.59
23.5631	88.6355	23.1951	117.592	34.4781	547.706	35.1329	379.87
23.5654	201.159	23.1954	103.816	34.4784	414.535	35.1336	203.878
23.567	94.9003	23.1961	115.633	34.4825	266.453	35.1401	322.591
23.5673	132.328	23.2016	108.79	34.4844	430.103	35.1605	299.722
23.5703	99.0609	23.2058	121.177	34.5257	300.635	35.2183	377.04
23.5705	119.846	23.2073	127.194	34.5775	263.169	35.2366	320.528
23.5722	180.302	23.2087	69.8244	34.5994	315.847	35.2745	298.819
23.5746	160.875	23.2125	118.927	34.6036	320.232	35.2893	248.352
23.5748	77.6705	23.2193	127.463	34.6211	324.079	35.3002	249.989
23.5759	206.625	23.2217	118.114	34.6358	360.017	35.3081	254.891
23.5873	131.039	23.2223	92.2955	34.6825	269.594	35.3376	319.209
23.5875	303.948	23.2227	153.505	34.6942	297.469	35.371	253.529
23.5901	179.45	23.2231	93.7232	34.7107	183.404	35.3929	300.746
23.5917	134.678	23.2238	155.093	34.7464	449.132	35.4204	356.422
23.5922	183.585	23.2256	95.452	34.7601	337.674	35.4327	259.695
23.5946	144.633	23.2282	111.172	34.7644	381.021	35.441	261.894
23.5948	148.395	23.2284	89.7969	34.8296	336.422	35.4584	294.693
23.5959	77.1295	23.2318	181.441	34.8388	405.272	35.4664	266.892
23.5967	170.231	23.2323	139.772	34.8473	343.76	35.4776	341.299
23.598	81.5761	23.2349	115.522	34.8496	229.55	35.4868	327.185
23.6003	124.056	23.2422	42.2927	34.8656	234.711	35.5873	377.897
23.6004	95.1139	23.2447	159.465	34.8845	358.543	35.5943	298.239
23.6013	120.729	23.2465	89.1584	34.8856	373.548	35.617	201.325
23.6019	112.818	23.2487	122.664	34.8949	267.357	35.6272	210.659
23.6053	185.429	23.2489	101.298	34.9158	290.114	35.6793	298.916
23.6073	121.755	23.2519	172.993	34.9349	346.964	35.7021	381.165
23.6089	119.39	23.2572	101.748	34.9482	183.705	35.7265	211.317
23.6091	132.79	23.2582	79.5548	34.9557	359.442	35.7468	258.28
23.6109	202.091	23.2614	120.88	34.9716	400.927	35.7538	310.62
23.6112	130.985	23.2617	101.207	34.9924	270.118	35.7611	257.887
23.6113	124.341	23.2626	100.2	35.006	423.094	35.7654	276.348
23.6155	91.6408	23.2654	141.997	35.0221	210.958	35.7694	393.33
23.6158	92.5853	23.2662	119.895	35.0237	233.555	35.7811	414.008
23.616	201.208	23.2683	168.574	35.026	336.468	35.7835	184.762
23.6165	134.33	23.2683	88.2011	35.0279	397.431	35.8136	367.882
23.6183	87.6473	23.2731	101.69	35.081	447.461	35.8304	190.247
23.6194	231.572	23.2731	111.633	35.0886	475.743	35.8304	204.643
23.6194	123.631	23.2873	189.342	35.0958	234.535	35.8456	415.103
23.6229	138.03	23.288	78.1919	35.0966	332.258	35.8678	391.553
23.6234	110.209	23.292	160.798	35.1025	317.487	35.8798	177.298
23.6248	131.741	23.2967	97.1713	35.1026	239.378	35.923	379.054
23.6262	141.234	23.297	116.78	35.1037	281.567	35.9309	344.714
23.6276	72.3321	23.2991	85.721	35.1857	201.422	35.9344	412.036
23.628	132.768	23.301	155.072	35.1902	456.438	35.9375	202.79
23.6287	205.555	23.3036	207.223	35.237	284.821	35.9648	330.1
23.6296	110.329	23.3093	115.412	35.2614	391.121	35.9761	404.519
23.6307	105.488	23.3102	185.504	35.2715	354.378	35.9794	287.17
23.6338	80.2253	23.3139	158.491	35.2848	343.403	36.0207	191.821
23.6361	103.449	23.3166	151.549	35.2865	228.792	36.0323	392.969
23.6362	170.822	23.3278	89.2437	35.2868	316.952	36.0495	244.175
23.6414	98.6339	23.3303	101.608	35.2931	303.324	36.0533	291.182
23.6416	77.4808	23.3313	100.881	35.3067	357.853	36.0729	287.406
23.6456	171.451	23.3327	185.457	35.3188	385.213	36.0887	249.903
23.6482	177.084	23.3328	76.9335	35.3264	538.083	36.0956	227.822
23.6509	127.795	23.3329	75.0609	35.346	226.446	36.1228	288.934
23.6511	87.9125	23.3352	66.3834	35.3629	364.034	36.1348	238.916
23.6516	101.024	23.3354	102.191	35.3689	185.181	36.1693	136.635
23.6523	166.761	23.3367	156.59	35.3908	381.625	36.2068	279.248
23.6545	190.695	23.3396	123.068	35.3938	355.537	36.2084	276.261
23.6571	59.6157	23.3423	104.254	35.4289	450.249	36.2088	305.612
23.6573	159.708	23.3429	87.5774	35.4354	329.115	36.2252	267.388
23.6575	260.062	23.3499	122.94	35.462	407.71	36.237	257.557
23.6587	146.548	23.3504	209.955	35.4704	237.01	36.2559	532.81
23.6615	130.667	23.3515	152.167	35.4792	332.144	36.3027	407.075
23.662	174.686	23.3528	106.612	35.4942	319.845	36.3567	339.892
23.662	69.7334	23.3565	103.062	35.509	389.489	36.3591	344.732
23.6668	113.119	23.3571	85.561	35.5177	402.333	36.407	386.519
23.6669	111.848	23.3585	90.6394	35.5329	617.223	36.4246	385.723
23.6673	118.848	23.3628	52.2892	35.5457	388.862	36.4343	144.651
23.6681	143.083	23.37	110.776	35.555	259.02	36.4375	234.041
23.6685	72.9549	23.3772	95.9004	35.559	272.648	36.4754	180.355
23.6704	194.256	23.3895	70.8888	35.5591	229.712	36.493	391.622
23.6705	129.861	23.3913	125.642	35.6055	416.098	36.4988	376.921
23.6706	99.7218	23.3919	114.459	35.6368	500.383	36.5128	252.028
23.6707	167.414	23.3931	183.958	35.667	440.464	36.5235	323.63
23.6719	190.842	23.395	84.4587	35.6714	338.504	36.5377	387.494
23.6737	136.557	23.3954	65.1827	35.7455	451.396	36.5528	263.623
23.6758	156.508	23.4045	161.498	35.7505	410.454	36.5686	231.395
23.6759	145.329	23.4052	110.389	35.7628	349.625	36.583	301.022
23.6775	88.7696	23.4063	125.305	35.7664	391.08	36.6474	569.195
23.6795	114.61	23.4075	170.923	35.7851	477.243	36.6596	270.294
23.6859	117.832	23.4097	102.327	35.8019	338.683	36.7214	392.522
23.6879	103.974	23.4099	117.883	35.813	318.291	36.7241	230.68
23.6898	146.557	23.4131	160.559	35.8652	317.179	36.7268	357.338
23.6922	111.216	23.4133	121.488	35.9009	237.219	36.7276	312.375
23.6933	93.8109	23.4152	58.8971	35.9093	295.886	36.7506	358.908
23.6943	103.664	23.4185	204.062	35.9118	247.93	36.7522	323.184
23.7027	105.824	23.4186	81.4282	35.9215	272.171	36.7933	169.153
23.7047	42.9765	23.4206	69.9942	35.9229	497.981	36.8265	453.903
23.7058	183.351	23.4215	83.6147	35.9399	267.489	36.8357	561.307
23.706	108.93	23.4249	121.527	35.9456	231.377	36.8433	205.561
23.7073	125.741	23.4283	111.207	35.9475	432.767	36.8459	329.472
23.7129	283.998	23.4323	118.232	36.0476	500.272	36.8468	265.705
23.7137	46.0952	23.4405	81.4008	36.0485	401.005	36.8759	438.863
23.719	183.528	23.4419	74.7616	36.0637	285.791	36.8786	233.854
23.7195	168.64	23.4433	94.2842	36.0823	439.423	36.8945	65.7402
23.7217	216.375	23.4492	114.62	36.0994	286.12	36.8961	220.301
23.7218	138.336	23.4545	147.669	36.1143	323.503	36.9609	231.623
23.7229	75.7334	23.4558	154.906	36.1255	648.209	37.017	314.205
23.7235	112.895	23.4595	115.94	36.1609	418.747	37.0256	491.716
23.7243	103.76	23.4607	188.429	36.1855	271.085	37.0459	292.242
23.7261	94.5394	23.465	75.9643	36.2261	713.133	37.0812	303.304
23.7277	242.372	23.4651	121.458	36.2309	175.982	37.082	206.377
23.7305	145.138	23.4676	183.731	36.2337	529.9	37.1096	347.4
23.7313	222.072	23.4695	119.347	36.261	367.5	37.1949	304.762
23.7314	163.247	23.471	81.0675	36.2757	402.344	37.2173	257.839
23.7316	80.3733	23.4752	122.881	36.2924	228.009	37.2241	286.97
23.7317	95.6187	23.4761	136.273	36.295	334.611	37.2357	308.157
23.7321	183.47	23.4784	223.217	36.3018	322.235	37.2367	273.778
23.7346	125.788	23.4808	89.3028	36.3145	349.004	37.2383	285.367
23.7352	138.779	23.4812	182.82	36.3356	464.971	37.3052	241.492
23.7399	149.765	23.4864	97.3968	36.366	335.896	37.3054	335.079
23.741	92.3706	23.4907	95.8829	36.3704	506.838	37.3211	337.935
23.7438	106.269	23.4917	134.512	36.3906	310.218	37.3275	272.659
23.7443	175.847	23.4931	126.513	36.4018	549.302	37.3412	318.992
23.745	89.5058	23.494	159.53	36.4107	446.203	37.349	424.375
23.7462	121.817	23.4971	82.1883	36.4189	381.934	37.3532	197.403
23.7463	109.492	23.5051	147.204	36.426	365.845	37.4148	357.607
23.7465	112.189	23.5142	108.504	36.4679	463.406	37.4613	201.333
23.7476	145.276	23.5152	133.614	36.498	335.14	37.4866	318.016
23.75	141.445	23.5173	149.316	36.5141	210.774	37.5689	380.754
23.7508	156.756	23.5207	111.21	36.5496	502.161	37.5879	268.27
23.7518	93.024	23.5236	143.675	36.5512	439.889	37.589	304.747
23.7549	122.66	23.5236	144.515	36.5539	306.33	37.5985	306.582
23.7583	129.024	23.5275	156.339	36.5867	401.461	37.6046	296.213
23.7599	131.919	23.5277	128.394	36.5888	402.076	37.6178	240.342
23.7604	111.807	23.5279	72.2408	36.6111	215.785	37.646	293.542
23.7611	133.762	23.5303	101.74	36.6393	228.385	37.738	168.074
23.7657	182.753	23.5303	78.4463	36.648	252.056	37.7732	238.021
23.7661	64.5544	23.5414	129.643	36.65	234.557	37.7909	279.474
23.7665	128.175	23.5422	138.483	36.6513	304.298	37.8107	752.724
23.7666	146.886	23.5475	144.369	36.6883	429.883	37.8181	440.426
23.7687	119.396	23.5509	117.062	36.7022	402.297	37.881	261.524
23.7704	174.254	23.5514	105.643	36.7166	440.614	37.8874	297.126
23.773	107.493	23.5523	80.9181	36.739	415.235	37.8888	383.148
23.7736	116.121	23.5567	172.335	36.7397	373.938	37.8897	364.425
23.7749	157.184	23.5594	193.667	36.7727	228.71	37.9038	331.303
23.7814	161.735	23.5624	105.219	36.7837	352.229	37.9812	315.908
23.7825	87.0986	23.5657	206.618	36.7893	327.357	38.0037	499.416
23.7828	356.565	23.5662	81.7673	36.8373	435.436	38.0193	273.803
23.783	95.3981	23.5676	70.1863	36.8508	451.494	38.0468	364.083
23.7842	83.1902	23.5685	118.024	36.8927	341.911	38.0811	378.645
23.7845	218.82	23.5688	85.5514	36.9005	367.149	38.0838	357.716
23.7854	215.067	23.5696	194.141	36.9244	393.639	38.0849	310.627
23.788	119.733	23.5723	119.587	36.9395	206.743	38.0952	417.214
23.7882	108.609	23.5727	116.815	36.942	341.865	38.103	304.276
23.7943	93.3532	23.5753	75.4119	36.9587	480.432	38.2058	255.86
23.7987	77.8426	23.5754	122.651	36.9703	468.236	38.2118	265.399
23.799	173.728	23.5769	105.293	36.9766	406.186	38.2393	358.341
23.7995	77.3138	23.5789	130.656	37.0052	261.849	38.2401	287.858
23.8031	96.4502	23.5795	113.519	37.0379	278.59	38.278	316.577
23.8096	250.857	23.5815	102.607	37.1563	451.724	38.3163	260.574
23.81	196.305	23.5816	179.514	37.1615	295.765	38.3171	398.323
23.8136	126.587	23.5838	114.091	37.1806	226.931	38.3264	361.245
23.8149	133.701	23.5866	105.493	37.1998	598.444	38.441	333.614
23.82	111.678	23.5886	89.5072	37.2261	434.908	38.4449	383.956
23.8227	131.688	23.5914	142.906	37.2326	406.822	38.4577	322.384
23.8281	94.2629	23.5927	177.065	37.2581	488.498	38.5009	294.757
23.8312	122.09	23.5952	140.504	37.2665	621.724	38.5142	142.413
23.8317	117.017	23.5972	75.6195	37.3328	238.161	38.532	241.536
23.8333	113.628	23.5995	96.0771	37.3632	522.545	38.5584	462.662
23.8387	265.066	23.5996	73.6516	37.3719	678.781	38.5831	279.35
23.8415	86.1376	23.6012	133.344	37.3971	440.73	38.5836	86.8459
23.8423	129.682	23.6054	137.159	37.4011	338.76	38.6761	285.002
23.8426	88.1643	23.6104	125.273	37.4084	451.962	38.6932	263.323
23.8431	136.988	23.6107	178.529	37.412	423.792	38.7256	451.165
23.8439	110.013	23.6118	161.885	37.4432	417.503	38.7263	280.812
23.8441	83.1071	23.6166	97.2186	37.4759	291.036	38.8294	355.251
23.8464	130.475	23.6187	115.862	37.5462	517.559	38.8361	128.422
23.8495	103.823	23.6223	119.968	37.5484	334.421	38.8467	207.711
23.8512	169.487	23.626	106.205	37.6285	483.599	38.8553	528.088
23.8525	93.5558	23.6268	110.626	37.6478	326.935	38.8758	544.285
23.8526	146.356	23.6297	341.2	37.6654	410.463	38.9533	364.676
23.8543	181.521	23.633	136.023	37.6683	417.027	38.9742	410.777
23.8622	114.86	23.6379	116.594	37.6703	266.432	38.9781	454.147
23.8653	125.746	23.6385	101.294	37.6878	52.664	38.985	296.592
23.8655	159.715	23.641	523.053	37.6936	219.785	39.0148	369.138
23.8674	146.672	23.6442	104.47	37.7685	329.569	39.0527	399.277
23.8686	168.575	23.6479	123.966	37.8213	273.265	39.0605	315.435
23.8704	156.822	23.653	57.1421	37.8408	306.312	39.0725	273.414
23.872	140.463	23.6536	169.866	37.85	299.211	39.0727	436.147
23.8729	99.1753	23.6594	93.4552	37.8734	307.184	39.0817	290.642
23.8736	163.386	23.6608	207.844	37.8987	328.215	39.1133	293.257
23.8774	175.916	23.6645	127.822	37.9238	284.908	39.1433	286.804
23.8794	106.046	23.6661	125.623	37.9284	277.569	39.1499	358.713
23.8805	95.1503	23.6692	272.981	37.9544	344.642	39.1617	376.882
23.8823	95.2995	23.6715	78.1601	37.964	298.058	39.167	293.604
23.8869	142.497	23.676	94.6586	37.972	379.556	39.1891	358.845
23.8886	173.702	23.6773	99.6524	37.9885	398.938	39.1913	696.054
23.891	163.708	23.6779	140.765	37.9996	398.397	39.217	330.469
23.8929	201.761	23.6806	67.333	38.0182	347.294	39.2432	163.224
23.8943	94.3881	23.6842	126.641	38.0287	278.557	39.2573	226.651
23.8944	91.3956	23.6869	126.77	38.0407	439.497	39.2848	348.81
23.8947	162.402	23.6917	100.327	38.0768	379.306	39.3157	326.121
23.8951	198.678	23.6931	136.298	38.0815	360.017	39.3188	235.931
23.8965	94.5084	23.6943	78.1649	38.0899	411.534	39.3535	273.413
23.8977	160.086	23.6953	77.4176	38.1084	298.544	39.359	319.046
23.898	96.4589	23.6962	182.594	38.1551	354.459	39.4146	475.89
23.9015	106.208	23.6984	110.925	38.1783	453.399	39.4421	239.88
23.9015	424.933	23.7002	101.866	38.2019	653.669	39.4801	375.111
23.9021	96.1732	23.7033	206.972	38.2768	471.184	39.4989	241.411
23.9068	152.606	23.7035	124.417	38.2901	458.356	39.5375	440.489
23.9114	114.986	23.7067	107.151	38.3082	246.804	39.5379	298.281
23.9122	83.3167	23.7148	158.074	38.3335	482.838	39.5417	259.719
23.9141	86.3125	23.7149	72.4428	38.3691	450.737	39.5717	228.909
23.9152	107.903	23.7197	125.82	38.3913	330.747	39.5791	299.34
23.9197	131.497	23.723	86.8986	38.4353	380.31	39.582	457.901
23.92	198.93	23.7252	94.3502	38.4397	389.402	39.5896	126.835
23.9202	106.281	23.7259	146.719	38.4532	375.123	39.5996	306.847
23.9238	138.697	23.7309	138.552	38.4943	336.864	39.6118	268.017
23.9268	103.979	23.7313	103.603	38.5037	138.997	39.6543	318.747
23.929	136	23.7324	117.185	38.5107	290.205	39.6636	442.807
23.9313	151.38	23.739	78.2055	38.5231	417.455	39.6889	377.655
23.9319	122.054	23.7396	250.463	38.5347	377.646	39.6923	182.958
23.932	156.833	23.7427	148.044	38.5571	201.221	39.706	360.02
23.9325	129.908	23.7449	93.7509	38.6204	385.025	39.7437	279.309
23.937	195.815	23.7479	219.402	38.6222	326.955	39.7977	382.56
23.941	92.1257	23.7518	102.805	38.6606	339.983	39.8028	470.472
23.9442	106.773	23.754	146.273	38.6941	358.097	39.8498	230.603
23.9467	100.316	23.7548	117.71	38.7571	396.975	39.8518	436.78
23.9483	111.305	23.762	111.575	38.7665	337.98	39.8575	323.818
23.9498	91.5925	23.7638	38.2846	38.778	317.281	39.859	311.919
23.9506	64.9081	23.7688	128.551	38.7811	494.11	39.8644	286.625
23.954	125.654	23.7695	187.659	38.7895	455.58	39.8732	364.115
23.9553	97.1049	23.7706	140.97	38.8132	274.493	39.9145	312.267
23.9562	125.991	23.7746	154.214	38.8178	314.16	39.9366	368.413
23.96	127.599	23.7767	139.619	38.8396	334.496	39.9412	532.221
23.9663	168.051	23.7768	66.0389	38.9006	447.652	39.9559	329.664
23.97	166.085	23.7785	112.73	38.9553	541.206	39.9693	459.506
23.9703	85.6318	23.7786	113.799	39.0799	308.164	40.0415	326.404
23.9713	100.321	23.7791	118.776	39.0891	313.999	40.1236	427.55
23.9732	120.431	23.7819	111.07	39.0968	129.982	40.1822	252.471
23.982	127.977	23.7869	548.503	39.101	284.798	40.1991	356.344
23.9852	172.84	23.7871	149.704	39.1237	311.273	40.2957	293.422
23.986	154.667	23.7877	118.829	39.1599	486.112	40.3061	298.568
23.9905	167.069	23.7915	126.675	39.2121	297.931	40.3234	377.278
23.9927	108.621	23.7936	141.638	39.3159	341.778	40.3554	438.493
23.9949	63.5922	23.7964	89.8785	39.3301	373.424	40.4087	385.138
23.9958	152.956	23.7984	90.391	39.3666	381.963	40.4386	372.691
23.9961	61.333	23.8023	77.9991	39.3715	449.678	40.4908	390.442
23.9979	119.773	23.8028	85.5953	39.4145	287.693	40.5072	334.651
23.9983	157.875	23.806	208.516	39.4189	522.775	40.5745	317.799
23.999	292.873	23.8096	176.047	39.4747	341.015	40.6267	390.86
24.002	80.8956	23.8113	94.8683	39.4958	337.812	40.7114	252.039
24.0022	186.561	23.8115	67.4688	39.4992	310.743	40.7244	177.062
24.0041	223.255	23.8115	120.152	39.5125	265.411	40.7483	283.476
24.0042	135.652	23.8161	95.9336	39.5406	453.792	40.7676	505.17
24.0054	143.909	23.8221	132.373	39.543	377.998	40.7794	266.874
24.0054	141.628	23.8234	84.9019	39.5503	418.223	40.7884	403.417
24.0069	239.956	23.8244	185.692	39.5752	378.255	40.8691	442.365
24.0077	112.938	23.8249	158.602	39.6078	508.26	40.8843	298.081
24.0078	139.921	23.8278	107.587	39.6268	501.155	40.9329	325.769
24.0092	164.074	23.8288	83.1068	39.627	317.974	40.9495	102.534
24.01	99.5729	23.8317	178.808	39.7281	527.17	40.9833	379.049
24.0185	105.09	23.8366	81.0147	39.7455	470.34	41.0138	356.118
24.0191	161.555	23.8381	152.808	39.7855	585.645	41.0182	276.925
24.0191	98.9283	23.8459	174.737	39.7894	449.981	41.0479	321.901
24.0207	159.426	23.8482	82.0351	39.7947	300.848	41.0484	258.725
24.0221	157.838	23.8489	174.652	39.795	282.915	41.0718	551.137
24.0302	124.26	23.8686	162.903	39.7995	250.096	41.0907	411.081
24.0304	77.0516	23.871	80.3778	39.8676	300.965	41.0916	433.101
24.0317	127.146	23.8819	308.879	39.9788	436.121	41.0978	218.547
24.032	172.58	23.8824	122.341	39.9825	393.424	41.1214	326.882
24.0362	168.519	23.8865	72.6807	39.9881	348.883	41.1253	267.302
24.0379	153.965	23.8929	155.787	40.0145	342.487	41.1798	309.568
24.0384	130.368	23.8999	94.1527	40.1536	527.477	41.205	517.296
24.0397	158.17	23.9042	83.4791	40.1806	570.897	41.2595	320.77
24.0402	87.7517	23.9071	80.4398	40.254	380.958	41.3486	338.377
24.0411	158.331	23.9083	123.792	40.2927	327.697	41.3971	281.161
24.0429	134.206	23.9089	175.255	40.315	338.434	41.4006	356.769
24.0442	142.78	23.9116	98.166	40.3331	517.632	41.4148	298.874
24.0453	117.497	23.9236	159.487	40.4265	498.796	41.446	396.637
24.0508	141.423	23.9252	99.9294	40.4268	488.858	41.4593	374.301
24.0533	80.9354	23.9286	127.785	40.5967	361.428	41.481	251.983
24.0538	103.547	23.9297	95.823	40.6665	413.154	41.5792	271.683
24.0573	174.219	23.9311	189.288	40.6904	0	41.5831	356.634
24.0612	94.9808	23.9364	169.436	40.7136	517.695	41.6436	254.567
24.0633	90.0388	23.9375	100.749	40.7252	349.256	41.7211	205.079
24.0648	124.8	23.9384	157.517	40.7987	381.641	41.7271	283.029
24.0656	97.8349	23.9442	117.95	40.8971	622.481	41.7335	299.673
24.0668	132.984	23.9512	92.2821	40.9074	428.556	41.8634	291.028
24.0675	220.102	23.9597	149.682	40.927	223.397	41.8676	408.735
24.0692	116.58	23.9644	118.233	40.9279	531.166	41.9397	196.97
24.0697	125.341	23.9681	143.002	41.0753	308.578	42.0166	205.384
24.0702	189.416	23.9706	106.428	41.0999	354.343	42.0428	369.494
24.0704	85.6959	23.9764	94.2372	41.1162	528.154	42.09	431.893
24.0755	124.469	23.9768	96.7458	41.1378	415.563	42.1068	404.622
24.0762	141.707	23.98	139.302	41.1381	556.268	42.2124	370.497
24.0777	114.134	23.9816	75.3555	41.198	379.916	42.2163	408.48
24.0793	178.14	23.9827	160.71	41.2199	488.666	42.2931	367.706
24.083	150.83	23.9836	155.765	41.2211	397.709	42.3222	369.551
24.0837	92.1401	23.9889	118.823	41.2598	357.976	42.3342	298.218
24.0856	256.528	23.9894	127.487	41.2765	364.856	42.3577	375.794
24.0859	71.8529	23.9897	87.2043	41.2911	308.348	42.4533	402.349
24.0878	147.522	23.9917	98.7138	41.3297	300.797	42.4662	283.016
24.0884	100.458	23.9918	132.458	41.3401	463.332	42.4925	382.292
24.0888	74.5986	23.9941	82.7023	41.3908	640.682	42.5035	370.514
24.0894	90.122	23.9942	110.027	41.3989	389.283	42.5341	260.936
24.0896	152.975	23.9947	165.456	41.4189	330.802	42.5602	253.487
24.0909	132.351	24.0041	95.6711	41.4611	525.715	42.6338	352.498
24.0972	111.455	24.01	127.585	41.4674	369.216	42.7489	416.594
24.098	172.943	24.0108	138.799	41.5303	323.471	42.7734	512.761
24.0994	104.172	24.0167	183.851	41.5536	429.919	42.8097	299.67
24.1006	107.885	24.0179	72.5449	41.5859	456.557	42.8127	314.818
24.1012	220.526	24.0218	138.503	41.6182	346.825	42.8665	267.021
24.1032	69.344	24.0286	218.769	41.677	570.564	42.8955	349.924
24.104	102.479	24.03	92.8032	41.69	559.554	42.8956	272.221
24.1047	175.233	24.0331	161.959	41.776	281.891	42.9418	320.201
24.1053	120.096	24.0338	73.9727	41.8203	384.275	43.0323	359.417
24.1093	173.231	24.0346	88.0886	41.8505	340.377	43.0836	322.402
24.1137	126.218	24.0378	158.565	41.867	518.562	43.1229	440.765
24.1142	122.732	24.0464	255.837	41.8716	380.229	43.2194	259.26
24.1143	117.406	24.0467	112.404	41.9106	261.95	43.293	545.722
24.122	178.587	24.0572	87.0374	41.9399	353.013	43.3121	419.795
24.1283	153.17	24.0602	160.301	41.9473	390.708	43.3719	360.371
24.1313	107.892	24.0672	105.706	41.9521	500.363	43.5109	328.739
24.1314	90.1386	24.0679	92.5348	41.978	443.883	43.578	517.836
24.1339	144	24.0699	131.335	42.0232	338.191	43.6162	300.465
24.136	98.6355	24.0738	112.476	42.0623	187.014	43.6443	284.666
24.1364	198.482	24.0755	127.821	42.0855	324.7	43.6558	370.371
24.1386	266.72	24.0789	141.517	42.0965	491.934	43.7102	362.035
24.1403	161.874	24.0813	129.726	42.1288	315.278	43.7208	375.405
24.1442	141.124	24.0814	64.7771	42.141	421.672	43.7712	298.23
24.1448	114.142	24.0837	176.509	42.1637	67.3526	43.7729	374.752
24.1509	142.407	24.0847	85.9681	42.1749	356.087	43.7781	366.473
24.1511	115.681	24.0853	168.134	42.1779	484.398	43.7986	400.961
24.1514	124.986	24.0863	123.768	42.1905	303.512	43.9002	532.128
24.1525	162.224	24.09	112.711	42.2154	490.319	43.9331	623.027
24.1546	147.852	24.0901	144.885	42.2611	293.444	44.0602	314.432
24.1546	114.85	24.0975	130.482	42.276	341.5	44.0917	398.551
24.1563	186.493	24.1039	170.607	42.5011	173.999	44.1037	450.841
24.1564	233.146	24.1073	118.698	42.5376	587.448	44.1925	410.201
24.1613	366.022	24.1077	185.136	42.6097	341.209	44.2278	425.237
24.1625	140.744	24.109	130.347	42.6518	568.227	44.2456	429.674
24.1628	128.856	24.115	242.315	42.9421	460.617	44.2738	465.82
24.165	196.535	24.1151	243.423	43.0442	514.789	44.378	332.879
24.1674	124.392	24.1158	119.389	43.0447	564.306	44.4412	304.51
24.1677	101.224	24.1178	135.943	43.0636	452.955	44.4578	440.854
24.1685	86.1884	24.1256	90.3897	43.1658	431.748	44.4745	417.088
24.171	84.6947	24.1284	156.113	43.208	614.596	44.5982	275.449
24.174	213.717	24.1284	143.111	43.2188	426.398	44.7218	409.521
24.1764	64.8355	24.1285	145.007	43.2199	623.317	44.7506	384.877
24.18	86.6181	24.1316	102.785	43.2426	487.089	44.7636	458.631
24.1808	157.473	24.1372	109.447	43.2488	471.673	44.7668	290.725
24.1808	176.698	24.1419	125.636	43.2647	546.318	44.7951	307.022
24.1873	85.8216	24.143	119.324	43.3397	418.739	44.8878	277.243
24.188	119.795	24.1455	116.452	43.362	384.361	44.9035	502.067
24.1881	131.499	24.1529	95.7859	43.3637	644.776	45.0413	253.916
24.1882	168.857	24.1564	133.011	43.4757	512.944	45.0519	382.765
24.1918	109.669	24.1583	134.02	43.5307	460.163	45.1256	239.537
24.194	110.084	24.1614	139.683	43.5492	434.198	45.1315	300.198
24.1975	171.145	24.1628	145.142	43.6033	476.658	45.1503	376.382
24.199	187.791	24.1629	110.455	43.7859	373.029	45.1513	692.549
24.2024	177.122	24.1654	170.204	43.7866	384.94	45.1883	414.057
24.205	84.5877	24.166	130.02	43.8385	445.67	45.2098	360.531
24.2076	129.524	24.1696	115.506	43.8391	502.497	45.2711	400.052
24.213	164.306	24.1699	103.522	43.8394	497.122	45.5332	390.866
24.2134	157.642	24.1701	122.125	44.0198	304.122	45.5428	408.055
24.2144	100.287	24.1736	88.8088	44.0482	196.844	45.5429	386.652
24.2162	103.739	24.1746	227.993	44.0863	429.754	45.5691	402.207
24.2164	96.9026	24.175	82.5033	44.1356	439.567	45.6696	323.759
24.2175	104.873	24.1812	157.548	44.1887	431.081	45.6746	408.459
24.2183	236.337	24.1832	103.824	44.2634	365.3	45.685	350.553
24.2189	118.284	24.1847	150.979	44.3733	319.312	45.7031	353.502
24.2217	106.476	24.1878	168.994	44.4406	537.968	45.7078	442.857
24.2324	169.935	24.1966	141.286	44.5589	667.267	46.0141	428.662
24.2359	113.089	24.2051	182.649	44.6447	286.532	46.0845	453.351
24.2363	85.9417	24.2081	145.906	44.6903	479.502	46.2242	464.266
24.2389	79.3978	24.214	208.509	44.7043	337.562	46.2336	643.768
24.2393	180.38	24.2175	71.9967	44.7542	604.172	46.4239	526.425
24.241	163.233	24.2189	88.4947	44.8147	496.11	46.5384	520.855
24.2412	117.381	24.2196	92.4104	44.8225	453.824	46.5397	477.592
24.2431	103.932	24.2259	146.617	44.8518	484.515	46.5576	469.644
24.2444	140.036	24.2263	218.498	44.977	478.612	47.0401	275.706
24.2492	73.6917	24.2287	142.437	45.1067	370.101	47.1171	169.399
24.2504	133.775	24.2477	107.803	45.17	353.235	47.1442	305.541
24.2509	105.298	24.2523	156.703	45.1746	710.117	47.2643	351.781
24.2531	163.336	24.2576	124.801	45.2378	398.394	47.2862	375.801
24.2541	171.538	24.2605	138.983	45.2661	607.178	47.3526	374.428
24.257	121.2	24.2645	100.512	45.3873	349.677	47.4241	408.244
24.2626	146.35	24.2668	131.328	45.4951	380.392	47.4456	332.537
24.2629	178.664	24.274	120.31	45.5523	530.454	47.4586	476.72
24.2629	134.332	24.2786	249.026	45.5544	430.824	47.4811	714.462
24.2651	107.442	24.2797	124.225	45.5627	406.626	47.486	738.258
24.2659	159.223	24.2835	118.925	45.6849	569.832	47.5325	340.497
24.2661	186.037	24.2866	59.2694	45.7324	359.784	47.6101	235.436
24.2736	77.5064	24.2872	67.2463	45.7507	434.047	47.66	532.429
24.2762	140.262	24.2901	147.812	45.7941	347.43	47.6909	341.111
24.2814	218.067	24.2902	189.555	45.8564	458.314	47.7921	215.735
24.2819	136.994	24.2941	159.305	45.9753	470.187	47.9762	344.25
24.283	116.558	24.2957	136.548	46.0132	706.576	47.9944	386.271
24.2886	97.1069	24.2996	72.684	46.0245	385.193	48.05	468.363
24.2889	118.651	24.307	130.354	46.1562	645.465	48.0956	408.144
24.2894	184.645	24.3096	143.506	46.2313	387.55	48.7931	435.013
24.2907	88.8963	24.31	88.998	46.2503	433.855	48.9675	461.055
24.3013	147.771	24.3123	151.504	46.2981	583.631	49.0782	325.157
24.3015	73.9782	24.3125	95.8039	46.4312	316.005	49.0857	75.1003
24.3078	162.015	24.3178	130.292	46.4634	444.567	49.245	900.746
24.3108	219.423	24.3213	141.45	46.4654	543.704	49.3325	463.317
24.3113	170.588	24.3227	150.656	46.5489	500.153	49.5246	445.446
24.3131	189.726	24.323	133.921	46.6708	357.467	49.5975	506.117
24.3262	93.0344	24.3276	294.309	46.6993	534.09	49.7325	196.312
24.3304	144.947	24.3279	158.656	46.7021	444.428	49.7958	369.992
24.3337	129.055	24.3287	131.437	46.7243	443.572	50.0689	458.84
24.3352	147.582	24.3299	157.491	46.764	378.605	50.3905	352.142
24.3353	137.962	24.3376	73.9269	47.2653	484.759	50.8275	641.827
24.3372	183.621	24.3402	440.364	47.4988	602.668	50.8399	359.184
24.3376	158.482	24.3427	205.778	47.6527	293.011	50.9956	404.996
24.3414	133.169	24.3658	157.49	47.912	555.633	51.1029	315.244
24.3433	121.835	24.37	134.425	47.9235	502.827	51.1098	468.448
24.3437	105.171	24.3711	160.401	47.9657	437.19	51.1173	153.673
24.3442	135.732	24.3711	103.023	48.0528	708.645	51.1443	336.888
24.3444	76.2527	24.3749	152.939	48.2147	507.066	51.6672	263.274
24.346	175.587	24.3798	162.937	48.2234	334.245	51.7417	355.134
24.3475	106.79	24.3815	101.744	48.4222	424.776	51.7913	458.801
24.3506	131.027	24.3839	126.373	48.7636	429.474	51.8278	472.387
24.3513	80.7502	24.3884	141.666	48.9626	366.89	51.9052	487.474
24.3514	194.881	24.3902	6.97727	49.0605	541.708	52.0189	264.299
24.353	110.116	24.3973	73.1836	49.0722	443.142	52.0779	163.882
24.3581	129.12	24.4023	121.676	49.146	670.945	52.1937	497.676
24.3665	140.831	24.4128	111.268	49.3238	475.743	52.2813	390.263
24.3693	179.805	24.4158	129.496	49.3454	445.894	52.2997	542.944
24.3752	72.0367	24.4287	67.9054	49.4506	417.924	52.3302	218.329
24.3755	99.7382	24.4304	139.579	49.4964	432.208	52.417	659.789
24.3791	143.716	24.4371	52.5985	49.5893	562.137	52.4514	417.921
24.3866	142.051	24.4383	110.461	49.6317	756.66	52.5709	362.141
24.3878	114.718	24.4399	136.222	49.7004	310.189	52.636	447.347
24.3935	164.413	24.443	86.7008	49.8275	733.961	52.6502	464.729
24.3936	126.707	24.4471	142.411	49.9407	583.296	52.6933	315.141
24.399	147.563	24.4472	89.9762	50.1327	353.44	52.6968	554.419
24.4115	256.91	24.4516	98.7043	50.1837	461.109	52.9212	422.583
24.4138	93.9399	24.462	298.329	50.1968	488.869	53.2394	403.563
24.4187	171.643	24.4638	177.664	50.2312	418.312	53.4974	438.591
24.4193	129.016	24.4711	183.256	50.2599	669.288	53.5446	686.51
24.4238	100.542	24.4779	111.194	50.2687	443.301	53.9691	594.569
24.4253	141.698	24.4788	125.437	50.2921	599.287	54.104	442.9
24.4258	178.786	24.4815	81.2837	50.4509	475.76	54.2224	481.514
24.4285	96.6932	24.4829	114.633	50.5913	564.468	54.4458	345.553
24.43	119.907	24.483	94.2861	50.8383	522.072	54.5079	543.734
24.4329	132.677	24.4861	69.1957	51.1386	431.975	54.9359	340.101
24.4368	183.345	24.4901	84.7902	51.2138	733.143	54.9616	543.077
24.4409	176.275	24.499	171.428	51.237	386.369	55.1805	574.825
24.442	130.048	24.4994	159.165	51.2517	687.116	55.2806	90.3809
24.4427	136.857	24.5101	90.1083	51.2898	324.688	55.3394	376.263
24.4433	136.251	24.5179	130.476	51.4275	520.333	55.5635	875.195
24.4454	166.604	24.5185	120.788	51.5275	773.453	55.5639	660.854
24.4502	99.5692	24.5212	108.304	51.7614	707.381	55.8235	423.378
24.4547	151.696	24.5218	137.865	51.9444	472.283	56.2351	619.815
24.4549	116.031	24.5372	174.555	52.3488	158.954	56.6132	595.947
24.4557	144.651	24.5398	190.868	52.3698	472.753	56.9683	375.772
24.458	167.315	24.5418	74.5034	52.3934	766.265	57.0969	369.858
24.4632	131.368	24.5421	99.3241	52.4072	669.34	59.1515	629.686
24.4632	124.012	24.5615	162.7	52.4489	458.876	59.36	613.738
24.4643	110.066	24.5721	125.87	52.4919	407.118	59.5338	447.263
24.4668	134.656	24.5761	172.822	52.5248	670.66	59.6265	438.145
24.4677	94.2073	24.5863	90.9871	52.5588	594.306	59.9356	764.74
24.4729	109.447	24.5883	66.8426	52.6684	460.907	60.0519	211.557
24.4739	192.023	24.5894	131.884	52.721	499.049	60.281	378.982
24.4754	135.956	24.5916	168.826	52.8336	511.106	60.4305	507.673
24.4834	181.758	24.5923	128.43	53.0523	624.385	60.433	659.19
24.4847	127.671	24.5929	209.024	53.0552	583.546	60.5729	323.147
24.486	109.746	24.595	205.412	53.1996	440.918	60.6043	506.995
24.4913	137.377	24.5955	136.012	53.2109	353.443	60.8201	458.447
24.4938	124.33	24.6068	87.7588	53.2117	553.521	60.913	441.583
24.4951	109.254	24.6123	138.232	53.4581	535.851	61.0191	395.283
24.4963	138.569	24.6159	181.124	53.5248	659.14	61.1692	596.057
24.5019	182.307	24.6201	130.205	53.5888	323.678	61.2435	755.678
24.502	156.97	24.6361	124.374	53.9792	469.386	61.3828	446.323
24.5064	129.414	24.6564	148.794	54.0366	60.385	62.2068	423.351
24.5067	130.51	24.6584	157.395	54.0436	533.439	62.2552	659.709
24.5092	90.7157	24.6629	100.221	54.2182	553.625	62.6643	721.761
24.5125	71.7328	24.6692	162.4	54.245	498.449	64	744.241
24.5155	100.631	24.6701	295.475	54.4118	510.197	64.774	482.359
24.5223	141.895	24.6745	129.602	54.4767	465.063	64.849	608.169
24.5269	177.977	24.6783	161.952	54.528	324.791	65.9355	407.072
24.5299	117.526	24.6791	107.551	54.599	290.109	66.1807	456.909
24.537	113.853	24.6895	137.934	55.0409	303.866	69.6863	322.127
24.5372	146.307	24.6968	234.537	55.0919	445.956	70.2522	820.233
24.5403	102.134	24.6977	83.0506	55.2517	409.288	71.3984	645.867
24.546	203.475	24.6998	127.863	55.9059	490.639	72.2688	353.959
24.5477	188.241	24.7072	135.086	55.997	421.315	75.1018	610.806
24.5521	393.828	24.7115	132.01	56.121	568.235	78.7728	462.175
24.5551	95.9891	24.7122	85.5151	56.3502	742.693	79.9485	921.397
24.5597	172.799	24.7149	97.2001	56.407	337.321	88.6681	641.848
24.5707	183.613	24.7154	122.371	56.4302	826.471	89.9082	326.258
24.5759	100.472	24.7179	106.027	56.544	258.425	97.2848	391.046
24.588	272.441	24.7249	73.7798	56.5891	564.092	98.5939	585.117
24.5913	181.967	24.7252	21.1767	56.7159	804.386	103.282	0.400327
24.5974	131.899	24.7347	194.295	56.8169	670.718	105.531	643.324
24.6013	108.263	24.7555	136.811	57.0689	486.346	114.449	812.073
24.6058	118.081	24.7583	179.214	57.1322	466.518	114.78	438.872
24.6064	148.72	24.7612	69.5083	57.3781	465.547
24.6103	133.602	24.7618	153.316	57.6003	128.801
24.6128	170.435	24.7664	155.446	57.6252	662.234
24.6182	105.765	24.7744	98.5394	57.7835	451.416
24.629	159.784	24.7802	145.293	57.8768	423.529
24.6339	123.319	24.7864	101.496	58.0525	665.763
24.6412	241.886	24.7881	119.798	58.7374	264.673
24.6592	177.636	24.7896	107.819	58.9056	454.617
24.6646	211.448	24.793	156.737	58.9966	431.949
24.6738	110.648	24.7952	96.2679	59.0145	535.876
24.6745	101.202	24.8029	206.598	59.1986	846.014
24.6812	214.311	24.8221	107.462	59.5389	146.698
24.6824	92.6202	24.8245	182.944	59.8345	637.002
24.6916	139.793	24.8271	234.385	61.1061	582.629
24.6983	128.523	24.8309	102.945	61.3694	586.276
24.7002	146.403	24.8357	127.982	61.8392	724.9
24.7004	164.567	24.8434	204.801	61.8429	641.912
24.7035	197.534	24.8457	111.42	61.9581	442.403
24.7111	111.181	24.8566	155.297	62.0395	599.17
24.7117	118.735	24.8581	110.635	62.4909	549.782
24.7117	209.616	24.8607	93.0205	63.5651	551.638
24.7136	95.7325	24.8619	137.35	63.6085	108.769
24.7164	118.106	24.8624	167.085	63.9827	855.642
24.7183	284.232	24.8642	152.431	64.0156	695.268
24.7196	171.208	24.8674	89.6901	64.7719	416.465
24.7204	176.381	24.8713	182.411	65.2	489.378
24.7286	186.793	24.8719	303.558	66.3104	413.124
24.73	141.301	24.882	169.873	67.5593	361.933
24.7316	121.438	24.8824	182.876	68.1116	442.016
24.7398	179.636	24.8832	132.87	68.4364	345.377
24.7425	145.248	24.8839	85.1275	70.003	875.672
24.7529	153.743	24.894	159.464	71.1599	598.423
24.7541	117.737	24.9053	185.915	71.5099	554.987
24.7576	128.232	24.914	151.162	72.4801	434.479
24.7637	18.2124	24.915	114.341	74.7146	510.041
24.7638	127.604	24.9226	177.243	74.8285	730.925
24.7684	153.314	24.9317	78.7193	80.7811	562.713
24.7706	96.7346	24.9396	169.822	89.3954	418.925
24.7723	305.606	24.9398	153.3	101.804	681.649
24.7744	167.903	24.9476	116.079	114.087	672.031
24.7751	120.549	24.9611	242.378	119.276	1097.91
24.7771	148.657	24.9641	115.579
24.7845	117.073	24.9679	99.466
24.7846	317.093	24.9686	162.754
24.7878	94.3248	24.9694	100.125
24.8207	214.226	24.9726	73.7423
24.8267	123.095	24.9785	162.151
24.839	189.205	24.9873	210.25
24.8441	159.101	24.9907	340.795
24.8493	139.51	24.9925	109.928
24.8561	177.099	24.9929	170.848
24.8577	147.789	24.9984	174.456
24.8645	174.795	25.0064	109.995
24.8678	135.395	25.0117	128.498
24.8693	84.8092	25.016	122.373
24.8771	134.447	25.0246	160.59
24.8832	201.49	25.0267	124.209
24.8845	155.605	25.0289	110.17
24.8862	105.795	25.0323	134.928
24.8914	333.875	25.0341	120.261
24.8945	127.87	25.0345	137.764
24.8967	217.399	25.0346	61.9178
24.9094	194.405	25.0352	125.274
24.9098	176.419	25.0511	154.825
24.9175	151.36	25.0527	169.767
24.9179	209.814	25.0628	148.062
24.923	435.659	25.0808	127.586
24.9266	105.967	25.0902	209.724
24.9276	187.363	25.0925	204.687
24.9339	231.99	25.0949	111.492
24.9427	86.5924	25.0972	173.1
24.9452	118.553	25.105	182.972
24.9628	197.541	25.108	175.369
24.9639	128.205	25.1115	106.071
24.9676	236.328	25.1162	102.777
24.9735	232.77	25.1205	169.374
24.9756	226.451	25.1216	343.67
24.9782	131.576	25.1322	199.642
24.9825	178.451	25.1389	111.855
24.9986	212.781	25.1429	219.951
24.9994	136.915	25.146	146.342
25.0051	161.586	25.1472	107.594
25.0085	292.781	25.162	142.434
25.0115	195.251	25.1621	86.868
25.0208	235.868	25.1682	162.864
25.0314	173.038	25.1694	141.801
25.0336	151.648	25.1715	101.323
25.043	192.825	25.1947	74.4103
25.0512	165.134	25.2028	79.0973
25.0575	140.959	25.2034	29.1669
25.0631	347.912	25.2044	122.535
25.0639	152.59	25.2089	115.493
25.0721	81.2052	25.2096	314.428
25.0765	176.71	25.2152	85.0641
25.0927	175.801	25.2405	180.474
25.0999	147.044	25.2409	124.927
25.1125	132.689	25.2772	715.288
25.1204	116.195	25.2786	172.498
25.1342	280.72	25.2788	73.2817
25.1373	163.886	25.2799	100.171
25.1395	219.423	25.2841	219.847
25.1411	141.313	25.2958	91.2815
25.1445	206.056	25.2965	231.343
25.1464	359.219	25.3031	83.6627
25.1544	59.4103	25.3054	191.222
25.1598	167.602	25.3131	170.975
25.1641	120.561	25.3159	193.041
25.1868	229.14	25.3314	183.933
25.1912	137.071	25.3563	137.286
25.1914	109.526	25.3572	300.257
25.1987	128.959	25.3658	104.228
25.201	110.692	25.3674	195.362
25.2036	115.676	25.3722	125.055
25.2102	163.805	25.3732	211.556
25.2135	183.968	25.3968	131.122
25.2158	234.841	25.4101	313.319
25.2307	18.0724	25.412	141.942
25.2401	196.689	25.4269	47.5453
25.259	104.915	25.4281	91.0592
25.2615	149.503	25.4289	97.6279
25.279	125.632	25.4309	188.591
25.2924	235.148	25.4322	162.294
25.2971	134.415	25.4334	64.2303
25.3094	133.144	25.452	148.911
25.3108	317.499	25.4542	203.525
25.3195	147.926	25.462	135.454
25.3233	110.79	25.4677	62.0474
25.3263	194.832	25.4702	128.282
25.3293	113.402	25.4779	319.445
25.3327	150.7	25.4812	35.375
25.3437	32.3437	25.4814	176.049
25.3513	112.857	25.4922	206.065
25.3655	158.499	25.4934	146.109
25.3695	165.687	25.494	113.817
25.3771	120.616	25.4953	85.6285
25.3773	245.359	25.5044	124.971
25.3887	100.201	25.5198	134.06
25.3913	136.313	25.52	123.504
25.4153	168.582	25.5247	169.576
25.4201	155.926	25.5434	125.76
25.4219	219.577	25.5599	91.3673
25.4383	179.593	25.6095	93.0436
25.4389	347.179	25.612	128.675
25.4398	171.26	25.6321	111.575
25.4458	144.421	25.6339	92.8091
25.4497	125.075	25.6398	159.342
25.4511	169.305	25.6467	108.267
25.4535	137.958	25.6502	145.908
25.4541	212.681	25.6619	164.071
25.4575	215.248	25.6801	196.925
25.4728	210.823	25.6892	103.841
25.4826	229.386	25.6922	147.055
25.4974	208.844	25.6934	104.752
25.5042	271.531	25.6981	90.3959
25.5123	123.66	25.7008	143.771
25.5351	101.266	25.7149	170.335
25.5358	162.95	25.7172	141.508
25.5408	156.45	25.7254	144.057
25.5504	167.63	25.7726	130.674
25.5584	142.817	25.7824	193.509
25.5606	40.7223	25.8027	105.015
25.5747	143.047	25.814	224.949
25.5849	157.362	25.8218	105.316
25.5925	104.353	25.824	95.0263
25.5927	44.3853	25.8277	220.188
25.5986	93.3144	25.8514	64.5873
25.608	211.472	25.8552	114.931
25.6188	146.188	25.8744	157.846
25.6399	198.312	25.8776	104.752
25.6449	72.8275	25.8869	141.16
25.6464	109.333	25.8974	171.994
25.6608	154.441	25.9173	139.076
25.6665	219.844	25.9188	215.523
25.6689	141.489	25.9283	94.0044
25.6728	130.825	25.937	150.591
25.6788	217.113	25.9389	140.183
25.7095	165.983	25.9393	81.0074
25.7178	173.844	25.9404	171.733
25.733	297.045	25.9424	45.071
25.7367	152.412	25.9557	199.562
25.7529	166.466	25.961	103.681
25.7531	207.637	25.9692	114.569
25.7692	160.71	26.0007	131.785
25.7779	208.08	26.016	214.005
25.8113	242.387	26.0392	242.292
25.8162	202.143	26.0404	87.9433
25.8172	172.382	26.0405	175.507
25.8221	215.61	26.0533	198.083
25.8287	151.054	26.0698	224.819
25.8471	272.374	26.1197	105
25.85	180.505	26.1281	133.101
25.8557	144.386	26.1454	191.484
25.8698	293.006	26.163	143.008
25.8721	78.72	26.1663	199.378
25.8828	155.559	26.168	145.133
25.8871	239.746	26.1811	198.119
25.8921	233.425	26.1956	354.996
25.8967	199.274	26.2098	92.9003
25.9005	133.314	26.219	141.563
25.9242	286.395	26.2254	136.45
25.9274	156.927	26.2442	109.15
25.934	204.524	26.2492	133.654
26.0415	230.837	26.3378	190.838
26.0882	182.679	26.396	215.896
26.1199	304.044	26.4105	77.9914
26.2051	157.522	26.4371	219.32
26.2611	172.825	26.5265	234.139
26.2827	187.931	26.5305	204.124
26.3176	169.256	26.5407	110.328
26.3386	181.379	26.5747	91.52
26.3431	135.677	26.5777	136.717
26.3674	260.386	26.5829	285.57
26.3897	167.857	26.5891	125.137
26.402	152.532	26.5891	143.154
26.4021	224.013	26.6135	143.44
26.4036	182.025	26.6144	262.281
26.4076	133.51	26.6381	81.3167
26.437	281.479	26.6717	238.192
26.5142	230.832	26.6718	689.452
26.6356	173.658	26.6876	219.057
26.682	206.622	26.702	239.666
26.7438	77.6169	26.7159	485.061
26.7786	204.237	26.7287	203.908
26.7977	80.5789	26.7358	191.885
26.8679	186.562	26.7428	118.375
26.8902	258.427	26.7622	2.2108
26.9199	350.632	26.773	184.022
26.9257	36.8947	26.7851	177.23
26.9304	253.449	26.7994	120.977
26.9319	202.402	26.8071	233.876
26.9371	160.328	26.8225	114.609
26.99	436.636	26.8314	137.293
27.0316	474.97	26.8345	84.3548
27.0352	181.86	26.8544	138.298
27.0469	131.447	26.8614	154.609
27.056	133.195	26.8645	344.056
27.0955	134.908	26.8694	212.953
27.1321	263.745	26.8837	29.2793
27.1892	9.01956	26.8963	99.8345
27.1943	211.606	26.901	138.13
27.2485	293.667	26.9392	61.7478
27.2775	416.937	26.982	110.884
27.4141	151.393	26.9838	137.63
27.5318	244.1	26.9865	172.206
27.8487	159.483	27.0087	162.105
27.9521	182.671	27.0251	144.795
28.0451	74.9036	27.0437	210.301
28.1163	156.643	27.0666	117.465
28.3452	240.822	27.0866	145.471
28.377	38.0788	27.0944	158.421
28.5399	485.299	27.0988	117.45
28.5507	163.725	27.1267	319.67
28.6473	164.542	27.1286	162.985
28.6944	245.559	27.1461	75.9636
28.807	220.075	27.169	120.378
28.9481	189.318	27.1837	108.627
28.9647	117.818	27.2779	163.804
29.0756	534.958	27.2811	112.52
29.1081	330.484	27.3456	152.222
29.2324	229.074	27.3553	440.755
29.507	126.634	27.4231	82.6947
29.6599	117.84	27.4402	157.84
29.6758	332.92	27.479	153.835
29.851	138.636	27.5056	83.2739
29.8725	172.487	27.5647	71.5109
29.9537	241.391	27.595	147.286
30.0884	73.7125	27.6128	77.4123
30.2238	173.345	27.6165	145.335
30.2267	409.63	27.6711	319.91
30.2445	295.237	27.6782	146.237
30.295	115.862	27.683	151.984
30.3501	349.594	27.7273	170.708
30.6999	257.248	27.7509	81.7319
30.7101	482.607	27.7617	177.413
30.9763	226.638	27.7716	119.233
33.007	299.181	27.7997	165.284
33.1732	110.226	27.8045	123.277
33.359	288.246	27.8309	186.601
33.6423	250.784	27.8351	58.793
33.7192	310.985	27.9867	240.743
33.9356	188.19	27.9974	268.885
34.5875	291.714	28.0052	247.141
34.9253	39.9479	28.0421	281.063
35.0004	227.671	28.073	232.021
35.0456	122.748	28.0936	171.348
35.4346	153.793	28.1197	177.276
36.8826	248.137	28.2216	447.354
37.7146	198.341	28.2933	137.31
37.7763	553.48	28.3023	175.529
40.0609	197.668	28.3111	102.283
41.0526	100.995	28.3402	250.582
43.653	262.139	28.3864	197.038
46.3236	32.8736	28.3885	102.786
46.6001	6.32762	28.3949	140.218
49.9804	735.085	28.3951	433.875
52.2058	101.908	28.4262	400.728
52.6259	522.569	28.493	145.28
55.8962	379.07	28.5558	179.335
57.1887	7.75762	28.5734	221.481
83.1779	165.73	28.5957	110.896
83.4086	146.058	28.6122	597.147
		28.6241	359.372
		28.6298	96.6552
		28.6517	170.313
		28.7255	102.816
		28.8973	124.903
		28.9341	264.818
		28.9397	104.918
		28.9446	192.76
		28.9798	354.356
		29.0458	220.365
		29.081	323.087
		29.2219	205.167
		29.3261	228.951
		29.3352	74.6191
		29.3687	166.899
		29.3748	169.748
		29.422	213.311
		29.5522	434.53
		29.5893	395.554
		29.5967	158.525
		29.6468	125.262
		29.694	312.721
		29.7386	128.232
		29.8003	171.179
		29.8451	115.793
		29.8655	395.886
		29.9166	86.3348
		29.918	133.75
		29.9191	327.975
		30.0312	379.026
		30.0775	190.022
		30.0823	536.985
		30.1995	148.494
		30.261	161.03
		30.4371	96.9567
		30.4496	78.5672
		30.4981	182.247
		30.5051	315.576
		30.5973	181.468
		30.6525	150.104
		30.8846	19.2388
		31.0318	133.08
		31.0568	138.342
		31.0578	259.082
		31.1164	298.851
		31.1578	158.346
		31.2188	63.6815
		31.3316	309.441
		31.3858	272.82
		31.4377	349.776
		31.4647	93.4618
		31.4727	133.244
		31.4897	151.78
		31.5606	52.74
		31.6204	331.746
		31.6246	96.6595
		31.8344	163.172
		31.9382	232.298
		31.9438	209.832
		31.9629	218.393
		31.9704	196.369
		31.9938	250.717
		32.0099	149.65
		32.0407	468.155
		32.0919	228.264
		32.1267	317.044
		32.1627	150.152
		32.2371	203.394
		32.2416	418.905
		32.2916	289.319
		32.3046	319.64
		32.3093	213.199
		32.3316	168.459
		32.3506	185.314
		32.4545	112.997
		32.4744	137.935
		32.5022	205.566
		32.5191	221.169
		32.578	350.442
		32.5904	155.293
		32.7086	138.998
		32.7202	301.303
		32.7218	151.096
		32.774	99.5521
		32.8345	254.13
		32.8412	92.2925
		32.882	208.908
		33.005	46.8901
		33.016	77.084
		33.0343	102.633
		33.0396	241.317
		33.089	127.935
		33.1128	275.8
		33.1874	127.981
		33.332	200.334
		33.3922	367.942
		33.3941	276.935
		33.4611	491.385
		33.477	132.905
		33.5116	82.59
		33.5422	290.348
		33.5701	137.955
		33.6155	206.123
		33.8877	312.989
		33.974	157.908
		34.1321	95.1372
		34.1375	255.278
		34.1449	258.86
		34.2982	138.84
		34.38	354.976
		34.5778	229.721
		35.27	216.867
		35.3385	303.853
		35.4957	246.824
		35.7501	410.242
		35.8489	94.2341
		35.9622	222.029
		36.0388	340.332
		36.3523	254.692
		36.4891	332.468
		36.6273	352.091
		36.6297	531.628
		36.6871	147.743
		36.9157	225.007
		37.1221	388.48
		37.1554	353.543
		37.2625	126.88
		37.2864	188.52
		37.37	464.353
		37.4467	113.306
		37.5793	366.305
		37.5892	304.052
		37.6682	584.046
		37.7788	113.82
		37.9146	504.488
		37.9354	487.934
		37.9856	104.073
		38.0246	281.177
		39.4108	215.199
		40.1661	388.31
		40.6191	329.322
		40.9384	213.36
		41.1403	319.72
		41.4192	278.657
		42.0358	350.119
		42.3884	349.135
		42.6856	302.946
		42.7033	330.648
		42.7095	470.226
		43.9594	241.067
		44.3994	388.72
		44.9322	610.674
		45.0477	165.9
		45.8104	555.403
		46.0676	283.78
		46.1559	104.844
		46.335	182.441
		47.1428	143.672
		47.3294	46.8034
		47.5569	133.676
		47.6795	561.938
		47.9518	260.977
		48.1505	188.888
		48.76	444.922
		48.9274	498.152
		49.5669	346.479
		51.6974	326.972
		55.4753	282.059
		56.3738	337.067
		58.0641	202.967
		61.2355	507.678
		62.7957	206.995
		65.7064	193.808
		73.0791	453.672
		75.5387	654.014
		75.5912	412.591
		77.7876	113.225
		82.3321	38.1274
		135.134	170.43
		180.08	124.383
		186.535	56.6222

## Sheet: Fig 4C
Untreated		G418 (200 µM)		Y-320 (1 µM)+G418 (200 µM)		Y-320 (2 µM)+G418 (200 µM)
rRNA	p53	rRNA	p53	rRNA	p53	rRNA	p53
7.72354	31.6557	8.77874	8.6971	2.62088	17.3896	17.6723	11.2584
18.8313	5.74699	15.6039	8.59375	4.69996	13.0738	30.0046	12.0198
20.865	7.5	28.6162	11.7053	10.6382	7.57701	30.2412	1.66038
26.9673	7.45455	30.3155	47.5714	11.2446	15.7333	31.5856	9.51645
28.3055	8.00571	31.3781	10.95	12.4486	2.16467	32.9396	11.5536
28.431	13.408	31.4996	11.4286	14.4855	4.74026	37.9904	13.7532
30.9207	10.1765	34.1654	11.9683	21.3383	5.74603	49.7504	4.93939
33.7751	8.55385	36.8115	10.7064	28.1165	21.0172	55.1542	11.8571
33.9207	10.8933	37.8662	11.7664	30.6561	19.7105	55.3251	15.6506
33.9411	10.929	37.9422	13.1558	36.1713	7.25888	55.6096	16.7273
34.2981	9.96279	40.6321	10.6833	36.5217	18.4533	55.7073	18.289
34.4031	9.65018	41.3442	9.975	40.4971	7.87943	57.7125	52.7283
36.2313	12.0862	41.5945	10.6126	46.9913	8.15278	58.5778	11.2145
36.3246	12.0993	41.6029	8.92208	47.2681	12.0104	60.3522	12.1634
38.5432	15.6522	41.7003	14.1757	48.1945	12.3913	60.9506	11.8657
38.636	12.0182	42.5914	13.2568	48.5165	13.5451	62.2154	19.6249
38.7232	9.68116	43.0309	17.7318	49.5044	3.17137	62.3741	13.6293
39.699	16.7636	43.2994	9.79965	50.8945	19.2405	62.4075	14.2607
41.308	11.0714	43.646	10.5227	51.6731	9.08412	64.1058	9.90087
42.626	11.7123	43.6518	12.2973	51.9518	6.63462	64.3286	10.0514
42.8431	10.6136	43.6599	10.3618	53.1704	7.80042	64.54	34.4197
44.6453	10.6961	44.0384	11.9233	53.4808	11.8018	64.8621	27.3931
45.7262	10.5488	44.2551	8.54438	53.8743	11.72	65.3707	15.6567
46.0717	9.912	45.2228	11.192	54.5031	11.7935	67.1277	18.031
47.1924	11.2183	45.2394	7.90407	54.5939	8.94038	67.2996	7.02337
47.8048	12.4975	45.2476	9.53544	55.4527	15.7717	67.3219	10.2287
48.0304	9.39623	45.7173	7.37042	55.8433	7.5	68.4782	23.1454
48.2949	9.72539	46.0746	8.92569	55.8804	13.6075	68.774	17.4951
48.4	14.4339	46.3142	12.4937	60.7539	13.0744	71.4183	15.1275
48.9082	10.3876	46.7058	9.85731	60.8021	26.1651	72.1731	23.6187
49.4925	9.90302	47.1179	12.515	61.5522	15.575	73.8585	14.9701
49.7625	8.99502	47.2862	11.5106	63.0989	18.2549	75.1647	14.0862
50.236	10.7371	47.8485	9.93131	63.198	11.5081	75.3048	29.5703
50.4124	10.7552	47.942	10.7595	64.3062	14.0231	76.8491	5.76395
50.5484	10.5277	48.1023	9.31304	64.8109	19.0202	76.863	19.0418
50.7242	10.7294	48.1796	12.5325	65.0766	18.3455	76.9539	22.7729
51.0247	10.1598	48.4861	8.52889	65.2492	11.5056	77.1507	30.5676
51.0472	11.9912	48.7938	10.2229	65.2776	11.6887	79.292	13.6514
51.1344	16.0154	48.8898	11.1542	67.1031	11.75	80.7635	17.6667
51.2439	9.62195	48.9256	11.159	67.252	17.3294	80.9266	23.8044
51.5768	10.8589	48.9523	12.2039	67.3989	9.71275	82.3485	28.6152
52.3301	10.4853	49.0948	9.64952	67.4558	6.14	82.4322	15.2414
52.8192	10.8279	49.1918	10.8868	68.1263	11.3047	82.9565	14.8973
52.9316	11.3806	49.343	10.8821	68.8784	17.9936	83.851	24.6798
53.2608	11.9482	49.5289	10.564	69.2993	10.2308	83.9295	18.4856
53.4982	10.3344	49.5565	11.3874	69.3272	5.20936	84.1148	14.6058
54.1577	10.982	49.8387	11.4021	70.1589	17.3025	84.7816	21.3294
54.2869	10.8858	50.0991	11.8644	70.7887	38.5185	84.7824	20.4204
54.3607	10.4599	50.1524	10.1373	71.0687	14.0988	85.2034	19.9542
54.4945	10.6	50.1634	10.6696	71.2533	11.9056	85.8996	21.0143
54.6279	10.0048	50.1839	12.3183	71.3784	10.7509	87.4007	26.2522
54.7499	10.9853	50.1949	9.08965	71.5595	16.3215	88.154	18.8825
54.7743	10.973	50.2152	13.2318	71.6269	14.5137	88.4819	16.7933
55.1274	9.52586	50.4247	10.7845	71.7135	13.79	89.0212	15.554
55.1978	10.4847	50.457	11.0368	71.7431	14.5808	89.1507	26.1071
55.2078	10.1883	50.5608	11.5378	71.8738	16.8662	89.3751	9.48298
55.2999	10.4224	50.7699	12.9186	72.154	13.8217	89.5657	25.397
55.3643	9.63832	50.9124	10.3122	72.3866	15.6778	89.8562	13.5706
55.6778	9.97969	51.3331	13.7238	72.5472	15.6558	89.96	61.0435
55.7434	10.7457	51.6936	10.586	72.7066	16.1711	90.6408	15.8974
55.7985	10.2344	51.7069	12.6649	73.0126	12.7095	90.7686	19.7908
55.9501	12.0149	51.8627	9.1873	73.1615	12.7558	91.129	13.5484
55.9512	11.2539	52.0127	9.83769	73.5	12.1038	92.3788	18.014
56.5946	11.1446	52.1973	10.7307	73.6667	17.7756	92.5131	16.9778
56.7192	10.4186	52.2867	11.4624	73.7087	12.5087	92.6635	18.3396
56.8421	9.99042	52.3561	13.0667	73.785	15.1366	92.8451	20.9534
57.0626	9.77238	52.4077	10.4761	73.8138	17.5856	92.8759	18.0786
57.2569	8.77188	52.448	10.5173	73.9424	15.1024	93.5389	21.3169
57.318	9.98599	52.525	11.4141	74.3248	7.35241	94.0714	21.4251
57.3441	10.839	52.6517	12.8675	74.3264	13.9421	94.5348	3.78788
57.3933	11.108	52.6865	10.395	74.6278	14.7747	94.6828	19.578
57.4836	9.55856	52.7509	12.4643	74.6386	12.2767	95.1124	31.5281
57.5008	10.6592	52.9314	11.3174	75.0001	16.9079	95.2168	17.8378
57.6371	10.2853	52.9464	10.9481	75.1252	13.9177	95.3608	26.9856
57.8451	10.5591	53.0329	10.6686	75.2	17.8083	95.5033	23.0266
57.8505	9.35047	53.1146	11.8068	75.3494	9.17192	95.962	33.0592
57.8581	10.65	53.2179	14.8048	75.4918	12.8197	96.1509	22.4023
57.9322	11.2639	53.3365	12.4363	75.51	13.4533	96.5625	14.6582
57.9969	9.38041	53.3461	12.2609	75.5234	13.4315	96.6021	12.7837
58.1083	10.3591	53.3661	9.15295	75.9251	16.6168	97.2501	12.4689
58.2512	11.3	53.3891	12.4171	76.1241	19.0809	97.2744	15.0978
58.518	10.9671	53.4383	10.1133	76.1957	14.3115	97.4253	20.4303
58.5845	11.8444	53.5488	10.822	76.2157	12.3334	97.6201	11.4284
58.6372	12.0844	53.5901	11.9045	76.2302	18.0279	97.9779	20.0142
58.7547	10.6364	53.7335	11.4992	76.3509	13.9939	98.0283	26.1811
58.7669	10.5601	53.7921	7.2763	76.619	13.3601	98.8979	22.4622
58.8808	10.7038	53.8236	11.1857	76.763	12.8974	100.225	17.1394
58.9054	11.2801	53.9343	11.2284	76.8494	24.3827	101.03	14.5315
59.0567	11.9646	54.3347	10.9623	77.0072	15.2839	101.052	16.6983
59.2016	10.2477	54.4034	11.798	77.0242	11.9011	101.213	17.5274
59.3061	10.529	54.4553	10.9087	77.2747	13.2812	101.814	24.2591
59.4897	9.8897	54.4648	12.1722	77.4552	16.4621	101.868	11.5151
59.5198	9.42929	54.5418	11.5042	77.4776	13.4351	102.123	22.1188
59.5297	9.83022	54.6179	12.1734	77.4924	13.7617	102.161	22.2992
59.5862	10.5134	54.6695	12.4074	77.5201	20.3007	102.253	25.4975
59.8628	10.4569	54.7364	11.0875	77.636	14.7591	102.708	15.6804
59.9246	11.3043	55.3703	8.50791	77.8116	14.2545	103.015	15.5491
59.9417	10.2257	55.3832	7.27665	77.8241	17.2792	103.044	21.6429
59.9471	11.7518	55.3832	10.3408	77.9612	14.7469	103.107	20.5712
59.97	10.4538	55.4086	8.58168	78.094	16.6717	103.148	12.7967
59.9845	11.5448	55.7145	12.0988	78.1411	12.1462	103.278	24.6415
60.0633	10.6658	55.7908	11.7893	78.2313	17.1638	103.475	16.1064
60.1398	10.7342	55.8168	11.259	78.3316	12.853	103.889	17.3852
60.2276	10.8513	55.8786	16.4045	78.458	15.7393	103.919	15.3076
60.2298	11.8043	55.9186	11.233	78.6166	16.5172	105.117	23.7537
60.3938	10.2079	55.9441	11.7135	78.7232	15.0039	105.224	21.2453
60.4533	10.6895	56.1484	13.9394	78.9575	22.4847	105.561	18.481
60.7898	11.1774	56.2539	10.9392	78.9978	20.2514	105.754	23.9115
60.8782	11.2814	56.2976	9.71322	79.2158	12.3564	105.85	12.855
61.3768	10.9904	56.3932	11.0895	79.2407	14.9155	106.077	22.6295
61.4652	10.1683	56.4969	16.4737	79.3413	16.3867	106.134	16.9012
61.4841	11.1514	56.5086	11.388	79.4961	14.3422	106.475	21.9175
61.51	10.6017	56.5586	10.0739	79.6397	12.6001	107.178	1.08333
61.5198	10.0601	56.5593	11.351	79.7581	10.9518	107.269	22.5997
61.525	11.6656	56.5663	10.5924	79.8716	13.8307	107.495	16.451
61.7036	9.30817	56.7393	12.5682	79.9098	13.458	107.534	25.6846
61.7239	10.0112	56.7793	12.0346	80.0545	17.9615	107.553	20.9557
61.7848	12.3503	56.822	11.2641	80.2082	11.4749	107.883	60.8992
61.8898	11.9562	56.8464	10.8092	80.2477	13.4946	108.131	25.8175
61.9026	11.53	56.863	11.9512	80.5402	16.2544	108.186	7.21818
61.9212	10.6015	56.8963	10.4993	80.685	15.0792	108.202	11.7765
62.0743	10.6716	56.9006	23.3475	80.7504	14.132	109.477	25.181
62.1179	10.0051	57.1209	10.7608	80.8182	14.3659	109.766	19.9166
62.1356	10.4726	57.1286	13.7156	80.8211	30.4094	109.893	21.1035
62.1779	10.1144	57.2253	11.0417	81.3416	17.6573	109.962	24.7034
62.2464	10.9817	57.2996	10.0601	81.3436	13.2781	110.031	19.9162
62.4485	10.513	57.33	11.1111	81.3934	14.6885	110.059	19.9457
62.5522	11.1573	57.3429	11.6036	81.4279	24.0888	110.488	38.1017
62.7442	11.422	57.4108	11.7954	81.9185	17.5449	111.474	19.2735
62.7676	11.1648	57.413	9.00821	81.9762	15.584	112.039	18.4499
62.8022	11.8914	57.448	10.1903	82.0043	18.6292	112.337	17.2028
62.8192	11.3502	57.51	10.7976	82.0498	14.7102	112.356	16.9231
62.8723	10.5744	57.5276	11.0699	82.1754	15.9154	112.624	21.3776
62.8859	10.0576	57.5392	11.1078	82.3238	19.2522	112.66	42.4917
62.9001	11.1302	57.548	12.1551	82.3602	8.36404	112.704	22.525
62.9651	10.6601	57.5759	10.753	82.4594	15.5528	112.94	19.6856
63.0868	10.0502	57.6068	13.7348	82.4706	12.687	113.012	18.8
63.1681	10.9481	57.8248	9.85877	82.5167	14.2107	113.055	29.6277
63.4945	11.3942	57.9301	11.962	82.5264	10.0962	113.067	19.0792
63.5789	11.2903	58.1275	11.3666	82.8138	16.4182	113.673	12.6228
63.5818	10.9431	58.2713	11.0319	82.8362	28.4903	113.766	18.1994
63.6058	9.82072	58.2797	11.4171	82.8776	13.6527	113.784	18.5529
63.6596	12.1256	58.4602	9.7739	83.1631	13.3395	114.374	20.441
63.7281	10.8642	58.4624	11.3506	83.2195	13.4932	114.472	33.8541
63.7573	11.2039	58.5322	8.43767	83.2394	12.2758	114.908	19.0867
63.8148	9.15883	58.5757	10.9757	83.3475	16.0796	115.067	16.0572
63.818	11.6406	58.6319	12.9046	83.4736	19.8503	115.176	24.0397
64.0998	10.7871	58.6787	12.782	83.6105	14.5458	115.359	18.3111
64.1521	12.2912	58.7226	11.9149	83.7001	13.1544	115.477	20.3992
64.1746	11.7342	58.8005	11.9324	83.8172	12.0518	116.011	20.4739
64.2338	11.3356	58.8199	10.9249	83.9123	15.8524	116.244	23.5759
64.2835	12.1139	58.8409	11.0282	83.9268	14.7013	116.317	15.613
64.7679	9.86425	58.9339	11.1245	84.7881	15.9948	116.499	20.9158
64.78	11.5365	58.9375	11.0436	85.0795	26.3303	116.652	23.6044
64.8116	11.5264	59.0539	12.2903	85.0806	12.5673	116.962	33.6182
64.8269	10.8429	59.0845	11.4892	85.2833	11.5804	117.384	24.5469
64.896	10.245	59.1844	10.984	85.3435	16.2059	117.471	21.264
64.9056	10.793	59.2106	12.1786	85.5222	33.3318	117.751	37.6012
64.9805	10.0667	59.289	11.8338	85.624	16.837	117.913	15.8087
64.9849	10.7408	59.3171	11.348	85.6997	19.2747	118.029	15.8434
65.0015	11.6654	59.3694	11.4209	85.7396	10.594	118.314	34.9982
65.1489	11.0955	59.4899	13.9426	85.7759	24.6119	118.334	31.6404
65.1971	11.0924	59.5073	12.4409	85.8198	16.8598	118.73	17.7445
65.2553	10.7313	59.5242	33.131	85.9221	18.6667	119.789	11.5421
65.2598	11.0404	59.5332	12.12	85.9379	15.4563	120.071	37.7325
65.309	10.2678	59.5801	9.15412	85.9481	14.3093	120.268	19.5644
65.3978	11.982	59.6021	12.8363	85.9631	13.8052	120.473	18.9982
65.4063	9.90009	59.6028	11.9759	86.1533	14.1875	120.56	7.43616
65.438	10.8467	59.6642	11.0083	86.1938	14.6829	120.617	34.8099
65.5036	11.8429	59.6694	12.0605	86.3224	30.3977	120.836	28.7094
65.5225	10.3355	59.7476	9.70798	86.6456	17.3969	120.924	43.849
65.5268	10.8649	59.775	11.7437	86.6679	14.9815	121.346	15.1752
65.6592	10.5264	59.7859	12.6564	86.8005	17.9587	121.558	29.5739
65.8247	11.012	59.8851	12.6637	86.8564	17.1244	121.803	33.9578
65.9079	10.539	59.9527	12.1509	86.8575	14.6712	121.87	30.7507
65.9424	8.87402	59.9713	10.0908	86.8906	19.9946	122.116	11.1525
65.9552	10.7032	60.124	12.1271	87.2122	17.4993	122.297	16.515
66.0356	10.7061	60.1452	12.8138	87.2365	26.5394	122.471	50.0026
66.0684	10.4294	60.1615	12.587	87.3297	20.8571	122.499	26.7553
66.1736	13.8117	60.1818	12.0963	87.3675	14.6011	122.518	27.8851
66.2425	11.2578	60.185	4.21714	87.416	21.0289	122.78	13.9722
66.3002	10.3579	60.215	10.8049	87.4331	16.9142	123.062	15.035
66.4932	11.5266	60.2855	11.3443	87.513	16.7254	123.128	18.6549
66.6291	10.5633	60.2968	11.7461	87.5201	14.9859	123.152	28.9162
66.6762	10.1754	60.298	9.29162	87.5301	11.7634	123.505	25.8952
66.7593	12.0705	60.3046	11.4657	87.6148	14.0103	123.997	35.4246
66.7697	11.164	60.399	10.8986	87.6773	17.8722	124.083	18.072
66.8872	10.0256	60.4484	10.0042	87.7581	13.9766	124.498	20.7474
66.9589	11.3435	60.5149	10.9986	87.815	15.1298	124.658	30.6031
66.967	11.2006	60.5474	13.1167	87.8662	17.0489	125.154	25.8376
66.995	9.77321	60.5705	13.5381	87.8847	17.9588	125.355	25.3636
67.0001	11.7973	60.5866	11.119	87.9253	13.2757	125.814	19.6386
67.0263	8.60622	60.6153	11.0137	87.9267	15.4196	126.001	32.078
67.0296	11.8963	60.6353	11.8533	87.9459	20.1591	126.783	21.7142
67.0733	11.6626	60.9452	10.7737	88.0311	18.1968	127.583	21.5344
67.1423	8.86531	61.0325	9.09179	88.3012	16.0219	127.64	17.9298
67.2016	10.5069	61.1957	11.6651	88.516	19.2817	127.686	44.9606
67.2486	11.7212	61.2357	10.8981	88.5172	22	127.702	26.1382
67.2707	10.6259	61.2425	10.9329	88.5228	13.289	127.809	17.3448
67.3363	11.0717	61.2853	10.9441	88.5924	15.6307	128.064	23.0406
67.3403	10.8907	61.3611	12.224	88.7369	16.6557	128.421	23.465
67.4793	10.6995	61.3783	10.4709	88.752	16.8748	128.426	23.6973
67.5313	10.8017	61.4232	11.5161	88.812	20.5577	128.469	24.0669
67.599	10.2597	61.4368	11.7386	88.8862	14.5314	128.523	18.416
67.6043	9.83491	61.4709	12.8107	88.9642	13.6135	128.535	30.8315
67.6852	10.0351	61.6076	10.6063	89.0784	17.3592	128.59	21.0548
67.6953	9.79243	61.6668	12.0816	89.3322	15.6605	128.65	17.3551
67.7196	11.6259	61.6744	11.3895	89.3746	14.3883	129.224	44.0239
67.7217	10.5685	61.7172	10.748	89.3777	15.3264	129.318	13.2238
67.723	10.9538	61.7435	19.0674	89.3886	12.8852	129.36	31.2672
67.7231	11.0044	61.8797	11.0956	89.4011	11.5601	129.501	42.5668
67.7449	10.6186	61.8949	12.6603	89.4197	17.4061	129.869	19.2885
67.8074	11.838	61.9928	10.8807	89.5847	16.1862	130.517	11.6103
67.9919	9.48354	62.0157	13.6514	89.6024	29.6911	130.896	27.9361
67.9935	11.5558	62.0528	13.5016	89.7569	12.4625	131.176	18.6896
68.0457	10.9552	62.0646	12.9061	89.7668	9.02567	131.467	24.8983
68.0497	8.80662	62.094	12.7112	89.8267	13.1951	131.89	27.0176
68.0756	11.5454	62.1075	10.4835	89.9567	17.685	131.895	33.3349
68.0984	10.8393	62.142	13.295	89.9658	23.9589	131.924	44.2487
68.271	11.6575	62.1517	5.55405	89.9748	15.0631	132.021	56.6905
68.2885	10.3446	62.1714	11.2391	89.975	16.1881	132.173	28.517
68.3374	10.3932	62.1816	12.6044	89.9755	14.2385	132.188	33.674
68.3545	11.5378	62.1925	12.33	90.0061	24.9949	132.247	26.7929
68.5376	10.0698	62.2399	12.3487	90.0272	23.9551	132.415	14.0243
68.65	11.311	62.2635	11.2125	90.0662	23.1347	132.572	26.9062
68.6967	10.4825	62.2843	12.0869	90.2033	14.8695	132.834	26.2105
68.7534	11.9141	62.35	11.4637	90.2376	3.33977	132.954	40.7521
68.7549	10.2062	62.3544	12.6689	90.276	19.5769	133.117	29.5244
68.7929	11.3327	62.4077	11.2121	90.2984	15.7713	133.21	14.1132
68.8114	10.0191	62.566	12.7478	90.3155	22.7672	133.317	41.7147
68.8217	10.4581	62.6504	11.6051	90.528	15.3992	133.395	17.7963
68.8555	11.1667	62.6705	13.6304	90.5287	19.4491	133.533	20.4446
68.863	15.3406	62.6946	14.5089	90.5624	18.8231	133.691	23.6174
68.9955	12.0549	62.7308	9.18726	90.5911	16.919	133.776	19.4992
69.0717	5.65441	62.7389	11.8682	90.6391	14.4892	133.899	35.6704
69.1228	10.7563	62.8131	10.984	90.6881	14.0572	134.16	42.8586
69.2376	10.355	62.8547	12.0027	90.8502	13.5259	134.201	19.6923
69.2536	12.0576	62.9209	12.203	90.9149	21.6307	134.232	22.429
69.276	10.2018	62.966	10.4628	91.0335	19.9877	134.444	29.5527
69.4012	11.6856	63.0397	11.2879	91.0658	23.6178	134.485	24.8673
69.4343	10.5985	63.0822	11.2591	91.1595	18.728	134.546	16.246
69.486	11.8262	63.1013	12.4462	91.1651	19.1278	134.598	16.9898
69.5591	12.1536	63.1017	12.4046	91.2665	16.8896	134.827	20.0877
69.6567	11.16	63.1366	10.8422	91.3605	22.6076	134.837	21.2038
69.6685	9.53727	63.1369	10.66	91.4562	17.0466	134.858	37.1639
69.7075	11.7339	63.2363	13.9821	91.507	20.6493	134.878	17.8527
69.7194	9.64596	63.2429	11.3049	91.5237	16.3766	135.831	29.011
69.7984	11.0938	63.2579	14.5907	91.534	16.3544	135.882	17.6993
69.8748	9.97391	63.2722	11.2336	91.5348	21.9746	136.002	18.3409
69.9696	12.2781	63.2783	10.0889	91.5979	15.32	136.256	16.3962
70.1617	11.567	63.3233	10.2109	91.7337	20.633	136.564	49.8632
70.24	10.9042	63.3816	11.1812	91.7714	17.3452	136.61	39.0159
70.2417	10.8346	63.442	14.0319	91.9144	13.5804	136.883	18.9268
70.3013	9.72036	63.4511	11.3496	92.0096	7.99793	136.984	23.3039
70.3172	10.9202	63.5066	11.4398	92.1411	14.0974	136.988	34.4857
70.4314	10.8274	63.5823	11.3904	92.1594	11.4906	137.436	12.8324
70.4794	11.7259	63.6951	12.684	92.2127	26.6606	137.654	31.4399
70.5084	8.66597	63.7286	12.6687	92.2448	20.2366	137.952	38.3883
70.5094	11.0502	63.7591	9.91332	92.5021	12.6607	138.051	32.5077
70.5484	10.7607	63.7878	11.7058	92.7112	17.2968	138.273	23.7649
70.5761	10.2713	63.8152	11.3571	92.8312	13.6675	138.351	19.3609
70.5896	10.6468	63.8503	11.8985	92.9988	16.6329	138.647	31.3013
70.7557	10.6259	63.8938	12.3106	93.0432	18.3489	139.031	28.7643
70.8393	10.3818	63.9208	12.8092	93.05	24.5465	139.296	13.2297
70.8424	11.9037	63.9304	14.2662	93.2126	12.3366	139.346	33.871
70.8447	11.7002	63.9708	14.0401	93.2161	18.3745	139.396	28.3623
70.9685	11.2966	64.0148	11.2574	93.3212	12.6579	139.753	38.3054
70.9873	10.4967	64.0161	11.542	93.3267	25.8499	139.773	41.2633
70.9969	11.056	64.0244	10.3719	93.4193	12.1377	139.951	26.5432
71.0678	11.3949	64.0298	10.9047	93.435	22.1967	140.128	15.1945
71.068	11.4928	64.0703	10.5006	93.4522	31.8027	140.42	71.4444
71.0792	11.6669	64.1097	9.59618	93.5414	17.9195	140.514	32.2812
71.0848	11.6154	64.2742	12.8847	93.5984	15.2712	140.716	27.2034
71.1717	11.4148	64.2922	12.4315	93.6601	22.8954	140.956	15.9473
71.3156	11.8438	64.3423	11.9241	93.7492	14.9118	140.956	23.1586
71.3771	10.8748	64.3582	10.2511	93.7936	19.0433	140.978	24.0066
71.414	10.8218	64.4198	11.4007	93.9026	18.9409	141.204	36.4152
71.4696	10.2678	64.421	14.5647	94.1328	14.3459	141.312	31.1556
71.6935	10.7903	64.4579	8.07023	94.1811	11.0598	141.422	22.34
71.7824	10.0696	64.4671	14.5326	94.2241	11.1008	141.969	21.0426
71.8716	11.2631	64.4975	11.4369	94.3387	17.5707	142.39	17.2379
71.8807	12.1722	64.5006	10.1427	94.3955	24.052	142.619	45.3306
71.9268	11.7342	64.5332	15.4234	94.4536	16.7246	142.668	29.1421
72.045	10.7423	64.5588	15.7109	94.4563	10.1123	143.305	34.0664
72.0508	9.72621	64.5884	9.99486	94.6536	15.5747	143.344	40.3376
72.0535	10.7608	64.6747	10.8391	94.6754	18.0592	143.967	13.5479
72.0731	10.8988	64.6798	13.7409	94.8572	16.5196	144.034	36.6074
72.1171	9.84076	64.6879	12.2137	94.9232	13.6069	144.07	25.6918
72.1332	11.0411	64.6883	13.1246	95.0012	36.6532	144.347	19.8724
72.1448	10.3997	64.6967	12.4072	95.0681	12.6389	144.516	23.3131
72.1948	11.2448	64.7247	15.0757	95.097	16.3049	144.682	25.4664
72.2569	11.253	64.7252	9.13971	95.1174	13.0644	144.919	24.782
72.2602	12.0426	64.9252	12.1488	95.1277	13.2579	145.022	15.5224
72.2911	10.4004	64.9381	10.5647	95.1965	17.8194	145.126	29.7558
72.3403	11.0675	65.0761	10.8677	95.3603	29.8374	145.139	39.7516
72.3754	11.0467	65.1089	12.8344	95.3767	13.475	145.197	22.0038
72.4253	8.97691	65.1466	11.2293	95.4148	14.3354	145.21	26.4533
72.4594	10.1027	65.1922	11.6525	95.4256	18.1754	145.307	23.5717
72.4789	11.2243	65.202	10.0011	95.4373	18.4985	145.447	39.9429
72.5387	10.7987	65.2173	8.07995	95.6388	18.4427	145.718	26.5485
72.5477	10.2405	65.2274	10.5506	95.7122	9.71026	145.881	24.2553
72.6495	10.733	65.3611	11.1314	95.7722	12.0565	145.893	23.9074
72.687	10.9949	65.3647	12.4486	95.7814	21.2821	146.076	23.3214
72.6982	10.3829	65.3819	11.4022	95.8863	12.5556	146.106	35.6787
72.737	11.3082	65.3894	10.6903	96.0629	19.6793	146.282	24.5185
72.7843	12.0179	65.4443	11.4405	96.0942	13.0066	146.599	12.1955
72.7845	9.79709	65.4615	10.7665	96.1605	22.9896	146.764	42.7263
72.916	11.8879	65.4645	12.9572	96.1789	21.7915	147.441	25.674
72.9375	11.6673	65.4859	10.8675	96.1896	19.7934	147.546	32.0775
72.9609	11.0635	65.5371	14.2075	96.247	20.5801	147.569	28.8804
73.0147	11.2203	65.5842	11.6891	96.4581	35.6315	147.89	20.1667
73.0328	12.1803	65.6113	9.76717	96.5734	12.946	148.009	24.8715
73.0339	11.926	65.6277	10.6647	96.6484	19.3184	148.349	29.3991
73.0381	11.3806	65.6284	12.152	96.6642	12.3196	148.435	48.019
73.0453	11.5085	65.6292	8.34448	96.6891	16.8958	148.583	39.2107
73.0514	10.9836	65.6429	11.6337	96.7454	10.5532	148.856	22.5998
73.0675	10.9343	65.6874	12.7089	96.801	17.3588	149.345	15.3964
73.106	11.2886	65.6885	11.7168	96.9687	19.1664	149.346	43.8124
73.1126	10.6859	65.6916	12.1978	97.0582	16.5817	149.491	25.983
73.136	11.4644	65.7	11.7885	97.1272	15.9737	149.579	28.3165
73.1532	10.7299	65.7099	12.8738	97.1845	17.4513	149.625	35.6424
73.1845	11.2823	65.8606	11.3512	97.2458	21.4584	149.701	33.964
73.1862	11.4898	65.908	11.8249	97.2795	21.8255	149.773	32.4378
73.1897	9.029	65.9374	11.8713	97.3088	23.4276	149.787	56.1139
73.2001	10.724	65.9623	12.4461	97.3326	8.84917	149.997	27.1943
73.209	10.7252	65.9897	13.0274	97.3585	22.4107	150.18	27.5196
73.2232	10.8892	66.0117	15.7186	97.3603	15.4068	150.256	23.7952
73.231	10.3151	66.0733	12.2022	97.4015	19.838	150.497	25.1334
73.2403	11.3913	66.1237	11.5939	97.4763	10.0182	150.582	25.8855
73.3076	11.5582	66.2065	10.8433	97.4801	14.7863	150.902	40.3597
73.3339	11.6272	66.2708	10.7105	97.5491	12.3258	151.24	28.6261
73.3425	13.006	66.3418	11.9965	97.7181	14.4935	151.42	40.4474
73.3531	11.3595	66.3517	11.3225	97.7761	17.0563	151.532	24.7268
73.355	10.0902	66.4347	11.8486	97.7893	18.0621	151.728	21.8688
73.3665	11.6278	66.4994	12.1648	97.88	12.1329	151.75	32.6629
73.4106	10.4588	66.5171	12.3853	98.0622	24.2136	151.832	20.2519
73.4766	11.4758	66.543	9.09259	98.0904	17.1462	152.03	32.1248
73.481	10.8589	66.6347	14.4591	98.1506	18.8778	152.185	25.896
73.5231	11.7703	66.6804	11.0927	98.176	14.1684	152.22	41.5125
73.5509	10.1363	66.7048	13.3014	98.3468	18.9159	152.263	36.6128
73.5528	11.4418	66.7107	13.3707	98.3502	26.4115	152.398	39.6248
73.5612	11.2836	66.7412	8.85579	98.4866	16.9054	152.457	35.1821
73.6363	12.5257	66.7528	9.65149	98.5552	18.9815	152.495	40.654
73.6774	11.3746	66.7889	12.2551	98.6171	22.6696	152.768	30.701
73.7352	9.75516	66.8302	10.613	98.727	19.9809	152.934	36.8138
73.7636	9.35943	66.8616	10.5178	98.8084	19.3075	152.953	30.6539
73.7683	10.7377	66.9903	13.7135	98.9245	24.4067	153.094	17.6762
73.7843	9.73673	67.0063	10.7578	98.9454	17.6945	153.248	81.7557
73.7876	9.87771	67.0076	11.3095	99.0155	11.0493	153.374	31.3723
73.7954	10.7931	67.025	14.159	99.0393	22.063	153.399	33.4858
73.8137	11.0481	67.0407	12.9193	99.083	14.8941	153.434	19.7527
73.8218	10.0785	67.0615	12.735	99.163	16.4725	153.497	24.4856
73.8525	10.2327	67.0647	11.7054	99.3199	17.9063	153.504	23.325
73.8647	11.1062	67.0693	11.316	99.4506	14.6236	153.657	19.0517
73.8878	12.6821	67.0815	11.1959	99.5334	9.83604	153.811	38.5897
73.9168	10.0977	67.1123	11.7746	99.5916	24.2507	154.108	28.4259
73.9289	10.8122	67.1244	10.7946	99.6235	14.535	154.305	26.4594
74.0074	10.824	67.1338	12.3729	99.672	18.9015	154.384	33.0797
74.0146	10.4586	67.3232	17.1	99.742	16.9548	154.475	29.2052
74.0351	11.2602	67.3355	11.932	99.8112	18.5693	154.813	28.297
74.0402	10.5426	67.3516	11.0462	99.8167	22.413	154.862	32.8035
74.1332	9.31862	67.3532	10.9441	99.848	26.3412	154.917	33.2239
74.1588	10.1838	67.3568	11.6998	99.8726	16.3057	154.94	17.1606
74.1719	10.3687	67.3666	11.7567	99.9843	12.0772	154.94	6.51013
74.2773	9.87201	67.4378	12.5094	100.044	13.8883	154.983	46.4222
74.2931	10.3472	67.466	12.5679	100.154	18.2696	155.217	44.4093
74.3184	11.1837	67.5215	11.3963	100.169	18.7645	155.527	25.456
74.3392	10.041	67.5279	12.654	100.185	18.0392	155.658	7.2038
74.3786	8.23324	67.5393	11.7304	100.214	15.2628	155.852	35.9397
74.4301	12.1523	67.5933	11.1353	100.248	7.48271	156.051	31.5125
74.4498	10.9602	67.6307	12.2655	100.282	16.4109	156.151	25.3497
74.458	11.269	67.682	13.7038	100.344	20.7367	156.204	24.661
74.4876	11.241	67.7261	11.6131	100.393	17.1781	156.216	22.9268
74.5072	10.8577	67.7955	13.4706	100.445	14.257	156.258	26.1811
74.5104	10.4336	67.7959	14.433	100.621	22.3421	156.265	25.6652
74.5302	9.74853	67.8405	11.4668	100.665	21.9282	156.469	21.8965
74.538	10.6674	67.8587	8.35281	100.693	15.6388	156.493	29.0014
74.549	10.3234	67.8595	10.4714	100.719	23.1644	156.521	45.1751
74.6999	10.1366	67.9416	10.1128	100.753	18.6165	156.573	16.6866
74.7107	11.405	67.9451	9.99403	100.88	16.3575	156.922	30.9043
74.7176	10.5378	67.9715	12.6721	100.92	19.5438	156.963	24.8532
74.7516	10.8462	67.9745	13.4316	101.059	22.0158	157.041	52.3611
74.761	11.2308	67.9809	12.0741	101.088	19.8686	157.192	29.2287
74.8375	8.83087	68.0125	11.3476	101.268	16.3131	157.3	37.6351
74.8464	10.9163	68.0379	13.7808	101.271	30.6545	157.344	30.8111
74.894	10.5627	68.0472	10.3586	101.33	18.3828	157.41	24.7291
74.9591	11.5337	68.0492	11.8192	101.359	23.2973	157.546	17.9469
74.9756	11.2947	68.1102	11.9034	101.385	17.6236	157.686	23.102
75.012	10.6469	68.119	10.583	101.413	16.5458	157.744	36.7282
75.0489	11.3217	68.1426	10.2086	101.547	4.6069	157.879	37.6304
75.0705	10.5722	68.1664	11.475	101.554	21.5198	157.996	36.5921
75.0792	10.5078	68.1776	11.9971	101.576	9.13745	158.182	23.4012
75.097	11.9314	68.2122	14.6564	101.621	18.629	158.308	49.8419
75.1909	10.794	68.2593	11.091	101.783	15.1175	158.317	43.6958
75.2024	10.8852	68.2601	11.0371	101.914	11.4068	158.33	25.4778
75.2243	10.9971	68.2624	11.9978	102.028	19.759	158.553	26.7652
75.2247	11.6392	68.2625	11.4828	102.08	16.0201	158.562	25.5522
75.2391	10.7869	68.2854	12.6981	102.107	18.3239	158.712	24.355
75.3325	8.35344	68.3187	10.4701	102.132	18.0127	158.788	35.8029
75.3385	11.3198	68.3859	13.2298	102.284	16.7223	158.936	33.4507
75.3578	10.9717	68.3861	12.4727	102.362	23.7757	159.124	37.82
75.361	11.3383	68.4078	11.6188	102.426	16.9854	159.125	20.8432
75.3636	11.5131	68.4177	11.0208	102.446	24.4581	159.354	26.8379
75.4663	11.241	68.458	9.70085	102.459	16.0192	159.355	24.9303
75.4864	11.1439	68.5509	11.8944	102.469	13.0614	159.602	35.9506
75.4869	8.82179	68.5573	11.096	102.499	27.5056	159.93	25.8296
75.4983	10.4243	68.575	10.8582	102.544	15.8391	160.152	17.8438
75.5632	10.519	68.5939	17.1527	102.544	18.7959	160.172	22.7172
75.5762	10.0116	68.657	11.3525	102.721	28.6767	160.41	29.6126
75.6808	10.2419	68.6951	13.0956	102.77	17.722	160.773	48.0151
75.6936	12.2105	68.7049	9.19715	102.823	22.1764	160.775	36.5422
75.7916	10.7455	68.7095	11.6507	102.996	25.8177	160.82	25.5091
75.846	10.8368	68.7166	16.5142	103.004	18.0886	161.299	29.6542
75.848	11.4727	68.732	10.4163	103.022	17.1563	161.32	48.0801
75.9384	11.1651	68.7648	12.6808	103.091	19.1173	161.381	45.0516
75.9546	11.3165	68.7662	11.4485	103.1	29.9903	161.491	34.4282
75.986	11.0416	68.8518	10.6125	103.262	15.0107	161.511	20.1193
76.0029	10.2253	68.8521	12.9198	103.419	17.6556	161.886	42.2378
76.0333	8.38907	68.8779	11.563	103.47	12.9722	161.93	62.7028
76.0535	11.5954	68.9653	9.63559	103.623	18.994	162.038	19.0706
76.0953	11.4965	68.9686	13.4902	103.648	13.3635	162.073	24.7185
76.1214	11.0063	68.9838	11.6289	103.68	8.2	162.471	47.5832
76.1506	10.3689	69.0108	11.5741	103.696	17.5153	162.515	38.084
76.2303	10.8218	69.0788	10.6413	103.709	19.0751	162.763	47.58
76.2349	10.8384	69.0979	11.2208	103.727	21.7166	162.786	39.4009
76.2384	10.0221	69.1162	12.5537	103.808	14.1842	162.793	15.3564
76.2686	10.6116	69.2159	12.8457	103.828	19.064	162.806	37.5483
76.3077	11.3671	69.2299	12.5375	103.917	18.8014	162.833	34.037
76.3404	10.8343	69.2751	11.7947	104.053	15.8889	163.241	38.9922
76.3753	10.4282	69.2877	11.3738	104.096	17.1987	163.323	24.1163
76.3774	10.5523	69.2996	10.8168	104.15	48.7752	163.512	21.1003
76.4063	10.5113	69.387	14.0493	104.197	17.8674	163.621	33.1704
76.418	11.3945	69.4159	13.911	104.202	28.1008	163.685	19.7943
76.4285	11.5166	69.4202	13.0879	104.347	19.3825	164	16.5335
76.4924	10.9018	69.427	11.7776	104.413	20.0992	164.035	49.8225
76.4941	11.5459	69.4321	12.0388	104.517	10.8335	164.185	31.697
76.5337	10.6507	69.4362	11.4152	104.533	26.6128	164.266	7.46084
76.6814	11.2768	69.5226	10.1677	104.548	15.0901	164.494	37.9803
76.6975	11.4502	69.5811	10.9852	104.644	20.2104	164.502	15.3103
76.7154	11.9121	69.6138	12.0839	104.73	16.3366	164.522	40.1194
76.7389	11.1566	69.6196	10.5129	104.835	15.5523	164.571	32.2056
76.7416	9.34845	69.6544	9.17635	105.004	13.8099	164.796	38.5061
76.817	11.6065	69.6667	12.6763	105.037	19.3642	165.195	20.4012
76.8315	11.0964	69.7019	12.2537	105.073	19.368	165.264	28.5396
76.8326	11.3526	69.7156	9.58851	105.104	29.8088	165.345	24.3143
76.8852	10.1806	69.7178	10.7775	105.141	14.4599	165.552	39.0842
76.9033	11.3562	69.7179	16.3858	105.201	17.4859	165.905	22.1315
76.9206	10.6794	69.7343	11.4294	105.221	14.3971	165.931	32.1494
76.928	10.7486	69.7541	9.76847	105.329	20.0328	165.984	26.0765
77.0394	10.6955	69.8184	15.354	105.527	37.8635	166.282	36.0201
77.0418	11.1267	69.829	8.61905	105.656	20.0379	166.45	37.2162
77.0457	10.2855	69.8318	11.0526	105.707	22.7973	166.456	23.9453
77.0824	10.0997	69.8489	11.4694	105.816	12.8018	166.473	28.6402
77.1159	10.368	69.8782	12.1181	105.828	15.4387	166.637	56
77.1232	11.446	69.8837	11.1178	105.844	13.0641	166.657	22.6647
77.1531	10.2911	69.9063	11.9806	105.882	18.1157	166.678	34.9863
77.1984	9.94716	69.9178	12.0368	105.902	15.4222	166.829	42.3311
77.3033	10.7032	69.9565	10.001	105.977	16.0654	166.978	28.4921
77.3113	10.4499	69.9985	11.2572	106.048	17.0599	167.118	41.3911
77.353	11.0033	70.0009	9.37887	106.054	16.5607	167.14	44.4768
77.3567	9.38738	70.0163	11.0309	106.112	14.2813	167.51	49.1351
77.3685	11.7703	70.0177	11.5295	106.18	34.9853	167.727	41.7489
77.3961	11.1406	70.0259	12.615	106.273	31.9388	167.783	22.5394
77.4034	10.9589	70.0288	13.0612	106.339	18.0317	167.955	36.5195
77.4123	10.9982	70.0724	12.02	106.375	21.9822	167.978	22.1189
77.419	10.3396	70.0787	13.5871	106.39	15.562	168.05	20.4544
77.4501	11.5227	70.092	10.9556	106.44	25.9225	168.2	25.8116
77.4508	10.286	70.0935	12.9359	106.544	28.8943	168.338	41.2012
77.4527	11.2702	70.1156	9.3786	106.612	22.6538	168.392	41.9092
77.5113	11.2721	70.14	12.0587	106.625	16.9835	168.432	40.2458
77.5926	9.89463	70.178	13.6023	106.632	18.6287	168.661	26.8102
77.6228	11.438	70.2368	11.8636	106.634	15.1883	168.878	13.137
77.6578	10.3586	70.2457	10.95	106.714	16.2453	168.905	29.3295
77.6622	9.4	70.2505	12.2833	106.716	14.3373	168.928	52.105
77.7055	11.679	70.2663	11.6556	106.722	11.4405	169.129	33.3129
77.7369	9.86176	70.2918	10.8235	106.735	11.9316	169.319	24.8722
77.7494	11.2353	70.2963	13.0702	106.746	17.6563	169.496	28.0622
77.8358	11.1331	70.308	11.4122	106.754	29.0948	170.064	54.3143
77.9469	11.7041	70.3391	13.5782	106.763	19.3035	170.168	44.9104
77.9804	10.8577	70.3576	13.0341	106.822	22.7619	170.269	37.5925
77.9832	10.387	70.3727	11.9361	106.839	11.7147	170.272	17.4643
77.9844	10.4794	70.376	12.0254	106.875	17.9048	170.533	54.7777
77.9863	11.8496	70.3952	9.7603	106.885	21.6397	170.544	42.0383
77.9916	10.6725	70.3985	11.354	106.921	25.0621	170.545	34.7689
78.0772	11.1944	70.4177	11.4779	106.963	23.0359	171.033	27.1727
78.1057	11.7013	70.4311	11.0589	106.973	18.5752	171.254	20.9016
78.1131	9.84806	70.4508	12.2305	106.983	22.3635	171.275	38.8493
78.1308	9.78562	70.4774	11.6776	107.022	18.7871	171.475	21.0366
78.1452	11.2349	70.4912	13.0728	107.111	26.015	171.595	47.3112
78.168	11.0779	70.492	13.8097	107.183	13.7111	171.612	34.764
78.1838	11.362	70.5154	16.1073	107.195	16.9476	171.785	30.5654
78.1978	11.1125	70.5677	12.2435	107.249	19.1408	171.822	47.3313
78.2018	10.6081	70.5766	7.4215	107.257	25.9167	171.832	26.5301
78.2664	10.2962	70.5852	11.8192	107.357	9.81171	172.077	35.6112
78.2778	10.6141	70.5959	10.2027	107.374	13.89	172.126	42.5858
78.2962	11.3641	70.6128	10.3033	107.381	16.0105	172.199	35.6372
78.4021	10.0513	70.6224	13.3837	107.443	30.8715	172.213	28.082
78.5215	10.4154	70.6267	10.5952	107.455	14.0175	172.386	45.409
78.5654	11.0385	70.6394	12.3972	107.468	15.5796	172.45	18.6215
78.582	9.78832	70.7436	10.9933	107.537	15.7614	172.486	34.1288
78.5909	11.9132	70.8387	11.2202	107.567	22.9334	172.548	33.4929
78.6196	11.1553	70.8758	11.1553	107.586	21.9633	172.737	38.6381
78.632	8.83532	70.8792	15.098	107.602	17.2393	172.816	15.8197
78.693	10.6036	71.0205	13.6283	107.689	25.7997	172.87	30.6229
78.6937	11.8431	71.0464	11.2214	107.813	10.1977	172.895	31.5499
78.7002	10.4996	71.0498	11.669	107.901	25.96	173.009	28.7046
78.7184	9.63292	71.1061	9.96446	107.949	8.80816	173.275	29.9406
78.7263	10.6879	71.1062	15.3701	108.009	19.8601	173.315	23.6897
78.7341	10.5843	71.1601	11.6008	108.027	12.7778	173.984	21.0751
78.7557	9.92571	71.1741	13.6897	108.075	22.6092	174.358	25.945
78.7654	7.89919	71.2568	10.5324	108.101	14.1825	174.694	32.1309
78.7678	11.7995	71.2573	11.8091	108.105	16.9395	174.764	18.9412
78.7858	10.5549	71.2761	8.50272	108.17	19.018	175.273	22.9867
78.8006	10.8805	71.37	13.5772	108.173	16.3046	175.338	33.8572
78.8137	10.8846	71.3761	14.2605	108.177	19.4646	175.427	27.4194
78.838	10.8068	71.3825	10.4093	108.195	20.2995	175.646	27.8341
78.8778	10.1571	71.3835	17.0539	108.25	24.6179	175.679	46.8909
78.8923	9.45705	71.3877	10.4429	108.339	17.0787	175.692	32.6966
78.9085	11.3625	71.3917	13.2498	108.39	14.7617	175.897	24.3483
78.9146	11.0129	71.4378	14.3597	108.496	16.8928	176.024	33.9211
78.9153	10.2857	71.449	11.9591	108.505	19.0132	176.162	28.1678
78.9606	10.938	71.4505	15.2144	108.505	21.4728	176.207	25.8569
79.0432	10.6981	71.4594	10.6431	108.547	15.3475	176.211	62.2026
79.0981	11.2348	71.4912	9.65923	108.552	27.858	176.23	47.7679
79.1301	11.3459	71.4976	14.734	108.605	30.8243	176.727	18.4252
79.1439	10.7651	71.5005	11.7873	108.636	15.0593	176.958	47.0821
79.1494	12.2082	71.5025	12.7366	108.695	15.143	177.162	28.644
79.1981	10.3975	71.5274	9.96259	108.76	23.9841	177.447	49.7107
79.2204	11.6465	71.5284	13.0677	108.777	18.9443	177.475	21.1284
79.2472	10.8919	71.5485	14.3642	108.819	19.4851	177.554	11.1205
79.2852	12.2278	71.592	10.6398	108.832	27.8377	177.589	37.9775
79.2864	11.4317	71.609	20.0365	108.866	23.3543	177.614	46.2032
79.2917	10.2973	71.6131	11.4355	108.976	19.6918	177.881	46.6142
79.308	11.2851	71.6207	16.8337	109.08	23.0397	178.165	35.1712
79.3184	10.0329	71.6239	11.5474	109.129	21.9345	178.327	25.1594
79.3681	10.6913	71.6291	15.3663	109.129	21.4407	178.484	23.7379
79.3981	9.25	71.7087	11.6325	109.154	21.4481	178.73	33.2582
79.4055	10.5728	71.7239	11.6702	109.246	24.168	178.764	26.2019
79.4316	10.8539	71.7427	12.2471	109.312	15.8337	178.879	46.6405
79.4682	11.268	71.7958	13.4419	109.338	20.9797	179.015	16.189
79.473	9.67148	71.8205	12.5227	109.396	17.0251	179.146	20.3354
79.5211	10.0299	71.8336	11.6739	109.423	22.5257	179.238	42.1985
79.5438	10.3266	72.1166	12.1036	109.51	21.6927	179.256	55.0864
79.5836	10.0165	72.1184	11.7894	109.725	28.8664	179.293	39.1899
79.6278	10.7568	72.1232	13.2919	109.745	13.3691	179.361	44.7623
79.6363	10.9874	72.1423	10.6494	109.779	12.4332	179.434	44.5009
79.6487	8.92865	72.1702	11.2134	109.81	18.0112	179.494	44.0477
79.66	10.455	72.1888	11.8657	109.842	28.2033	179.623	44.2206
79.6853	12.0447	72.2112	13.5306	109.908	12.2024	179.689	22.3121
79.752	9.72414	72.2114	14.3684	109.932	15.0245	179.773	20.417
79.842	10.7043	72.2216	11.0612	109.932	18.1077	179.849	29.834
79.8988	11.2498	72.2233	12.1962	109.935	17.286	179.942	37.1514
79.9368	11.0804	72.2915	12.6227	109.943	17.0744	179.973	42.9632
80.0163	12.0702	72.296	12.6062	110.158	11.3197	180.103	13.3538
80.0517	12.1779	72.3626	12.5336	110.196	15.6719	180.124	17.7403
80.0578	12.2023	72.3711	11.8192	110.446	20.3405	180.162	32.0438
80.0681	10.8633	72.3802	12.5239	110.447	26.7401	180.191	29.1105
80.1433	10.9563	72.3882	11.2859	110.474	19.7022	180.448	26.7083
80.1597	10.4465	72.4335	11.6993	110.53	12.8902	180.479	14.153
80.1788	9.90957	72.4646	12.278	110.532	26.0183	180.656	39.7456
80.1846	11.1088	72.4722	12.7966	110.569	24.7762	180.917	35.3177
80.1859	10.958	72.4971	12.5812	110.59	14.6168	180.968	31.6367
80.2198	10.2834	72.5097	10.6635	110.701	16.1138	180.987	29.1894
80.2496	10.3207	72.5595	13.6859	110.738	30.273	180.987	40.7036
80.263	10.3987	72.6056	10.7039	110.76	20.9216	181.079	19.9353
80.2689	11.8618	72.6484	5.84	110.767	23.2687	181.126	35.9407
80.272	10.8261	72.6584	12.6588	110.773	27.5821	181.365	51.5025
80.2826	12.5786	72.6602	10.0081	110.774	23.4375	181.373	24.1261
80.3452	10.785	72.6682	12.9866	110.787	22.6593	181.407	48.4138
80.4758	11.1867	72.6938	12.3358	110.856	19.6296	181.444	41.3735
80.5111	10.7451	72.696	12.3085	110.858	17.9904	181.551	52.5848
80.5509	10.9048	72.7362	9.87325	110.93	20.4065	181.76	39.7576
80.558	11.018	72.8369	12.5601	110.986	21.0648	181.854	37.6049
80.6345	10.9065	72.9325	12.017	111.036	18.9252	182.316	34.9256
80.6471	11.3569	72.9521	9.26617	111.112	21.3194	182.602	31.1429
80.7021	11.199	72.9648	11.96	111.133	20.4271	182.617	29.9793
80.7986	10.1055	72.9858	13.3563	111.135	22.0922	182.649	23.5285
80.8335	11.1657	73.0006	12.3529	111.17	22.4725	182.756	32.7531
80.8643	11.4855	73.0543	11.887	111.184	10.4523	182.895	48.2883
80.8835	11.5941	73.0636	15.6437	111.213	16.7399	183.171	39.9106
80.9152	10.43	73.0766	11.3218	111.214	17.4512	183.3	20.9264
80.9561	12.0077	73.2171	13.7492	111.23	17.7421	183.649	59.243
80.9564	10.3955	73.2579	13.5532	111.3	20.3949	183.967	52.8405
80.9754	10.8586	73.3249	9.90026	111.459	17.6594	183.99	42.3033
80.9961	11.3367	73.3437	12.8486	111.584	24.0203	184.179	47.762
81.0426	10.4833	73.3537	11.2036	111.678	16.6301	184.481	26.9275
81.103	11.4262	73.355	13.038	111.74	16.1853	184.625	53.677
81.1581	11.2818	73.3633	12.1242	111.942	17.7809	184.7	48.4594
81.241	10.3508	73.4014	10.1172	112	11.7538	184.785	18.7091
81.2745	7.84964	73.4779	12.0011	112.083	15.6943	185.196	18.1981
81.3173	11.1705	73.545	11.8913	112.179	16.5474	185.784	47.9463
81.3482	9.91885	73.5484	10.667	112.254	17.9016	185.905	19.8882
81.3596	11.0877	73.5965	10.6014	112.325	11.3251	185.961	28.7834
81.3721	11.9572	73.6106	11.3475	112.34	32.1023	185.999	101.677
81.4395	11.1434	73.6228	9.29814	112.426	23.9178	186.01	28.2135
81.446	11.2768	73.6245	13.2101	112.429	23.4152	186.228	33.4373
81.4594	11.009	73.657	11.8268	112.45	11.5568	186.301	13.472
81.4707	11.4519	73.6598	12.688	112.478	18.2776	186.652	30.4621
81.5012	10.5114	73.6929	10.7968	112.573	16.6581	186.776	48
81.5181	10.5897	73.7036	11.4779	112.59	30.8001	186.992	33.0047
81.526	11.0567	73.7179	11.5803	112.683	18.3918	187.615	28.4989
81.5523	11.1019	73.7462	13.2003	112.688	19.2998	187.615	27.2871
81.5786	9.9927	73.7733	11.1761	112.734	15.183	187.806	35.2354
81.6504	10.9333	73.8511	11.3576	112.746	18.3301	188.035	32.2468
81.6781	10.5665	73.8634	13.0966	112.846	23.0734	188.045	36.3047
81.7425	11.7319	73.8939	15.6245	112.977	15.8448	188.075	47.6219
81.8049	11.2208	73.9966	11.1723	112.984	21.8569	188.084	26.3775
81.8098	11.2794	74.0041	12.6815	113.069	27.4818	188.274	50.5571
81.8352	10.9887	74.0381	13.2802	113.075	13.4013	188.3	68.3671
81.939	11.8464	74.0393	11.6901	113.145	15.5328	188.539	46.8869
81.9684	9.6986	74.0514	11.6791	113.292	13.0406	188.546	32.12
82.0409	11.8704	74.0856	12.0584	113.317	27.1961	188.555	32.8449
82.0488	9.93964	74.1079	9.04772	113.337	16.5847	188.853	41.2875
82.055	11.2759	74.1212	13.827	113.379	15.6155	188.997	41.672
82.1734	11.0079	74.131	11.2977	113.381	13.7505	188.998	42.4907
82.1876	11.1944	74.1931	10.7525	113.385	26.976	189.11	37.223
82.1886	8.43287	74.3013	12.5776	113.411	17.4868	189.157	34.5893
82.2123	10.5055	74.3026	11.5334	113.475	14.3789	189.248	43.3901
82.2726	10.3848	74.36	11.8848	113.486	24.4356	189.339	46.4175
82.2918	10.4395	74.3932	11.3436	113.503	23.0972	189.372	31.6126
82.3063	9.82777	74.4167	12.2105	113.508	19.6914	189.41	33.5068
82.31	9.68958	74.4208	11.8237	113.53	12.018	189.839	39.1859
82.3299	10.4195	74.4265	12.1319	113.544	12.2003	189.85	33.1455
82.4135	10.7466	74.4687	15.6064	113.569	21.5163	190.359	20.023
82.504	11.1146	74.4778	12.2346	113.59	22.8984	190.411	32.2365
82.5089	9.00412	74.4974	11.2199	113.598	19.3065	190.422	37.8527
82.5529	10.1649	74.5293	9.87733	113.651	22.0594	190.802	54.6518
82.6251	10.9767	74.5405	9.75282	113.682	22.2477	191.035	44.3781
82.6261	11.2843	74.5551	14.6277	113.765	25.6938	191.088	34.2179
82.6505	11.1248	74.567	12.8201	113.803	21.533	191.324	33.1298
82.7071	11.2468	74.5874	11.0602	113.888	24.4685	191.567	54.6469
82.7446	11.195	74.6121	13.4728	113.922	15.5685	191.592	40.0225
82.7541	10.441	74.6151	15.5443	113.956	14.4036	191.651	37.8427
82.7629	10.213	74.6799	11.0298	114.014	32.5105	191.683	29.1148
82.7674	10.3773	74.6926	13.0645	114.076	15.4578	191.932	39.8549
82.7942	10.3286	74.7013	18.7769	114.107	18.7209	192.213	41.0766
82.8111	12.5558	74.7343	12.0889	114.173	25.2426	192.262	23.6362
82.8357	10.422	74.7493	12.2411	114.197	31.707	192.541	55.1612
82.861	11.8793	74.757	10.4824	114.239	14.6235	192.71	23.5012
82.9001	11.5917	74.7615	17.0034	114.295	23.1795	193.009	38.6807
82.9187	11.5866	74.8666	12.5926	114.474	20.3461	193.171	21.9141
82.9217	11.4145	74.8871	12.534	114.474	19.1756	193.172	27.9234
82.9773	11.1855	74.9089	11.5429	114.613	25.5652	193.312	55.3557
82.9919	11.2903	74.9132	10.1252	114.646	28.8084	193.345	61.4415
83.0084	11.2517	74.9198	14.3045	114.671	20.5325	193.444	38.2827
83.0084	11.0014	74.9204	14.5271	114.682	15.1454	194.009	49.0833
83.0384	10.565	74.929	10.1481	114.703	17.3648	194.109	38.4455
83.0482	10.6329	74.9494	10.6903	114.733	26.0432	194.239	40.2281
83.0849	11.101	74.9505	10.2415	114.756	19.366	194.496	23.8843
83.1374	10.5714	74.9653	12.8686	114.935	25.6148	194.65	80.4568
83.156	11.3525	74.9958	11.8992	114.984	33.2081	194.739	44.7696
83.158	11.0538	75.0081	12.0153	115.011	24.7375	194.741	43.7113
83.2229	10.4304	75.0338	12.8845	115.062	24.7174	194.774	39.9951
83.2289	10.8033	75.1051	11.7329	115.103	17.3031	194.882	64.6387
83.2603	11.4204	75.1083	22.6824	115.192	17.3521	194.975	56.7075
83.2634	10.7627	75.1373	10.7301	115.232	14.3008	195.021	25.7291
83.2789	10.2658	75.1736	14.9127	115.253	25.9091	195.188	29.8393
83.2804	12.3652	75.1738	9.92282	115.323	24.3849	195.237	56.1784
83.3805	9.39076	75.2062	11.8575	115.33	11.9369	195.497	27.7467
83.3951	11.921	75.2476	11.7805	115.414	31.9357	195.611	48.2374
83.4463	11.5818	75.2588	11.7816	115.437	15.3385	195.618	25.5525
83.4899	9.93382	75.2597	11.243	115.449	25.5926	195.699	42.7993
83.5704	10.5557	75.2608	10.1352	115.482	19.0256	195.903	76.2756
83.6645	9.78547	75.2681	10.2104	115.516	34.6981	196.097	25.8582
83.6795	11.1717	75.276	16.44	115.56	18.5005	196.106	18.3754
83.7026	11.0522	75.2991	11.5595	115.578	18.1742	196.123	36.1232
83.7045	11.0514	75.3081	12.9368	115.587	19.4525	196.151	27.0022
83.7186	11.5692	75.3803	10.7066	115.637	20.26	196.305	52.4612
83.7255	11.0787	75.3843	10.7997	115.656	20.6034	196.323	39.3807
83.7267	11.7538	75.4006	11.0343	115.66	16.4701	196.685	42.092
83.7957	10.2668	75.4146	12.5056	115.67	34.3515	196.69	51.3513
83.8112	8.57998	75.4418	12.259	115.693	20.6665	196.834	16.2135
83.835	9.87241	75.522	11.5338	115.703	26.2124	196.856	30.6229
83.9538	11.0484	75.5386	13.6392	115.708	19.2545	197.165	39.4625
84.0239	10.0668	75.5485	11.9779	115.734	16.2865	197.22	45.3084
84.0575	10.1105	75.6183	13.9064	115.761	23.6038	197.312	20.4579
84.0621	11.3843	75.6725	11.812	115.811	21.7522	197.359	25.2182
84.0664	10.0274	75.6779	11.9241	115.928	28.6325	197.373	20.0038
84.0904	10.0396	75.7054	12.2544	115.951	20.5687	197.458	52.9553
84.1155	10.9538	75.7091	9.92826	115.955	21.0093	197.507	2.50535
84.1192	11.5033	75.7186	12.5852	115.978	20.2828	197.599	48.6989
84.2127	10.177	75.7729	13.4897	116.027	46.3674	197.643	27.7477
84.2278	10.6326	75.789	12.195	116.184	28.0392	197.702	30.0431
84.2435	10.6548	75.7951	18.7201	116.221	17.2977	197.785	38.8094
84.2441	10.1636	75.8056	10.8486	116.234	25.0998	197.923	41.8641
84.2506	10.2031	75.811	11.0208	116.248	33.3566	197.964	33.9538
84.258	9.4153	75.8234	12.6296	116.324	44.1965	197.974	15.7141
84.2597	11.6306	75.8266	13.7244	116.357	19.1866	198.099	43.176
84.2651	10.63	75.8341	11.9037	116.376	16.3668	198.266	26.2011
84.3262	11.1422	75.8604	11.764	116.511	19.2221	198.311	31.8529
84.3265	11.3035	75.8635	11.8413	116.576	22.6389	198.788	45.7127
84.3331	11.1215	75.8673	11.4383	116.595	18.7442	198.791	45.9712
84.5025	11.9257	75.8709	11.8075	116.664	25.6962	199.027	35.7629
84.5111	10.6047	75.8834	11.069	116.667	12.6667	199.242	26.2987
84.5163	11.4113	75.9255	14.8369	116.708	19.7154	199.454	43.7302
84.5229	11.7445	75.927	10.6922	116.753	32.3133	199.647	28.2911
84.5241	11.4036	75.9359	12.9692	116.793	23.5019	199.66	40.236
84.5411	12.091	75.9377	13.1812	116.885	31.826	199.718	58.5783
84.5805	11.2974	75.9396	14.6589	116.938	19.7524	199.982	17.7275
84.6083	11.7911	75.9463	17.7294	116.959	31.2878	200.01	38.9436
84.6527	10.9738	75.9475	11.5634	117.06	29.8114	200.156	64.8103
84.6691	10.8802	75.9634	11.5619	117.084	31.0234	200.223	44.8201
84.686	11.6419	75.9705	10.3511	117.204	20.5797	200.437	37.0279
84.698	10.9447	75.9862	10.6833	117.21	13.3328	200.818	45.7507
84.8064	12.0337	76.0109	11.0825	117.226	18.9084	200.907	28.7353
84.8434	11.7721	76.0177	12.2061	117.233	17.163	200.978	32.6746
84.8863	11.2066	76.0732	14.1805	117.285	28.9713	201.13	50.5108
84.9344	10.5176	76.0992	19.6009	117.293	14.5435	201.91	21.4489
84.9503	10.6898	76.1151	8.98925	117.301	26.3454	202.1	45.1909
84.9552	8.79683	76.1704	10.6143	117.331	17.5398	202.257	39.6963
84.9906	11.5258	76.1867	10.6636	117.355	20.1726	202.315	24.7756
85.0305	11.8231	76.2255	12.0859	117.375	24.4792	202.495	24.9206
85.0603	10.3604	76.2516	12.5685	117.42	23.0623	202.619	40.8122
85.071	8.05414	76.3727	11.2358	117.485	18.8257	202.716	55.616
85.0818	10.5401	76.4228	14.1873	117.486	20.754	202.803	35.8203
85.093	11.1075	76.4639	9.91548	117.51	14.3607	202.83	38.1304
85.2001	9.51452	76.4805	17.2319	117.522	18.9097	202.845	28.2639
85.201	11.8116	76.5065	11.4536	117.616	15.6302	202.966	41.4248
85.2682	11.0841	76.5394	29.6395	117.718	25.7612	203.052	47.3521
85.2715	11.3156	76.5416	9.3297	117.854	21.6101	203.178	45.2222
85.2839	10.6109	76.5549	11.6515	117.919	24.0211	203.179	30.0969
85.2937	10.3269	76.5679	14.4931	118.011	17.4995	203.218	44.0792
85.3099	9.89792	76.5845	10.7863	118.072	19.9132	203.302	32.2345
85.3449	10.4537	76.5951	11.3484	118.261	29.1188	203.36	37.1738
85.3528	10.2532	76.7389	12.7149	118.262	17.8431	203.428	44.9417
85.3602	11.0357	76.7413	11.3328	118.287	18.4549	203.477	59.0712
85.3992	11.5724	76.7455	12.7638	118.318	25.232	203.888	22.6496
85.4143	10.3149	76.76	14.8648	118.32	24.9249	203.908	54.3037
85.4252	11.2459	76.7658	10.055	118.338	30.3219	204.49	63.9082
85.4278	10.5205	76.8187	9.10359	118.415	15.341	204.506	43.3609
85.4342	11.177	76.8545	25.5692	118.421	26.3833	204.582	39.9635
85.4559	10.1984	76.8545	11.5291	118.432	15.4381	205.009	35.3658
85.457	11.4214	76.8618	11.5081	118.453	27.6647	205.035	34.5904
85.4844	10.4445	76.9061	11.5573	118.482	32.8627	205.116	36.6488
85.4971	10.2063	76.9624	11.7481	118.505	35.2539	205.167	53.456
85.4991	10.2455	76.9643	11.8681	118.574	11.738	205.374	45.12
85.5278	11.4255	76.9721	13.6129	118.614	20.0195	205.469	26.5844
85.5535	10.9425	76.9921	15.3243	118.656	19.9393	205.826	42.3518
85.559	10.9123	76.9972	12.228	118.694	14.1143	205.878	42.7594
85.5763	9.70413	76.9976	12.7503	118.828	18.5547	205.958	35.7475
85.6334	10.8034	77.0293	13.3269	118.861	15.0648	205.98	37.8009
85.6412	10.3041	77.0308	9.73291	118.977	32.6201	206.128	36.7785
85.6643	11.3303	77.0346	11.493	118.991	22.1733	206.362	25.4872
85.6778	12.7346	77.0968	11.5105	119.069	20.7072	206.467	48.5818
85.6903	11.2705	77.1086	11.2284	119.085	23.6667	206.623	21.6678
85.6936	10.9976	77.1396	12.2199	119.142	11.485	207.685	37.2432
85.7056	10.5232	77.16	12.8899	119.157	15.5762	207.724	44.1607
85.7195	9.51716	77.1883	10.1396	119.221	32	207.82	48.6971
85.7794	11.4379	77.1974	12.2042	119.292	17.2769	208.001	30.3582
85.8564	10.307	77.2096	13.8816	119.337	16.9247	208.053	68.8379
85.9306	10.5454	77.264	13.2224	119.343	15.4105	208.062	48.0868
85.9361	10.6275	77.2728	21.2855	119.359	17.6151	208.249	21.4946
85.9455	11.71	77.2954	13.0601	119.411	15.944	208.337	19.8562
85.9731	10.5163	77.3074	11.5229	119.423	17.9559	208.499	25.2187
85.991	10.4405	77.3338	12.2425	119.47	21.6446	208.527	58.5024
86.0221	10.189	77.3445	14.8771	119.474	19.6838	208.542	50.0923
86.0398	11.2726	77.3582	12.0417	119.478	15.9397	208.629	38.9312
86.0551	10.5674	77.3976	11.5573	119.479	21.9817	208.634	37.1284
86.0918	10.2673	77.4138	11.6933	119.485	23.3036	208.68	27.8305
86.1278	9.51405	77.427	12.3063	119.576	26.0768	208.691	45.9135
86.1437	9.70732	77.4352	12.0805	119.631	20.8756	208.709	44.5
86.1447	11.5707	77.4378	12.6415	119.646	42.4589	208.749	35.3228
86.1473	11.7619	77.4755	10.6951	119.678	34.0533	208.889	41.2293
86.1875	10.8522	77.5628	10.7838	119.745	33.9895	209.073	50.9659
86.2107	10.6295	77.5739	10.5787	119.757	19.4058	209.114	43.1154
86.2382	11.0487	77.6049	11.8093	119.769	20.1508	209.222	37.1254
86.325	11.4068	77.6335	9.29594	119.789	34.6724	209.358	54.4803
86.3404	11.1855	77.6408	10.8269	119.862	24.25	209.429	32.3698
86.344	12.1589	77.6719	11.0237	119.879	15.7402	209.586	48.9565
86.3461	9.15237	77.7385	18.949	120.024	36.3876	209.688	48.001
86.3564	10.5443	77.7621	12.5346	120.065	30.0764	209.781	52.4184
86.3838	11.7584	77.779	12.4425	120.123	15.8182	209.895	33.3832
86.4426	10.4494	77.7794	12.1482	120.134	22.4128	209.999	64.608
86.4496	10.6774	77.7825	14.3933	120.272	12.8036	210.059	31.0833
86.4781	11.0854	77.7858	12.7363	120.442	13.4382	210.126	42.9313
86.5037	11.6293	77.7882	12.9694	120.52	16.9702	210.317	37.8697
86.5074	11.1234	77.7885	11.9251	120.63	27.1846	210.523	36.5559
86.5354	11.0114	77.79	12.6199	120.81	17.7904	210.668	36.7484
86.5378	10.1513	77.823	14.7279	120.828	32.77	210.677	18.9115
86.5592	11.5572	77.8358	12.8578	120.885	25.9137	210.938	60.6921
86.5879	11.5795	77.8546	13.9575	120.946	21.3504	210.939	29.509
86.6333	10.122	77.9686	10.9599	120.98	21.286	210.978	49.5658
86.6535	10.7213	77.9722	13.008	120.984	21.0868	210.991	34.7859
86.693	11.3957	78.0662	13.357	121.007	29.9506	211.017	36.9982
86.7035	10.9547	78.068	9.83412	121.097	27.3536	211.053	52.0094
86.7405	10.2677	78.0825	11.3138	121.105	23.6734	211.184	41.6762
86.7422	10.5062	78.0849	12.5818	121.12	27.7211	211.187	37.0797
86.8018	9.96829	78.1153	11.816	121.154	22.8916	211.206	84.7115
86.8324	11.7717	78.1571	11.3959	121.166	30.968	211.315	48.1989
86.8569	8.4156	78.1702	18.1595	121.21	18.8803	211.444	42.7682
86.8779	10.2796	78.1735	12.2819	121.255	30.6905	211.565	49.3727
86.8951	11.368	78.2148	12.2511	121.256	21.0285	211.608	43.7767
86.908	12.5786	78.227	14.6933	121.273	20.5029	211.646	32.9986
86.9084	11.0879	78.2887	15.9237	121.333	27.1945	211.818	44.4903
86.9161	11.08	78.3032	12.3363	121.355	21.2231	211.921	36.5603
86.9415	12.251	78.3093	15.0654	121.41	16.3808	211.987	59.5451
86.9535	11.7443	78.3183	13.2444	121.423	22.161	212.024	46.6444
86.972	10.7512	78.3207	10.2554	121.435	15.1644	212.23	39.6624
86.9907	10.758	78.398	13.0544	121.746	13.1649	212.613	38.569
86.994	9.41552	78.4247	13.2043	121.767	28.7405	212.995	23.2599
87.0028	11.9226	78.4365	12.1812	121.777	19.206	213.047	25.1516
87.0524	10.8386	78.4662	16.7389	121.803	19.3737	213.068	19.598
87.0574	10.5589	78.4677	12.9249	121.814	14.3808	213.087	43.1966
87.063	12.4622	78.474	14.852	121.948	12.1121	213.173	55.6403
87.0818	10.5989	78.5357	12.586	121.96	29.4464	213.194	62.215
87.0995	10.8095	78.547	11.1411	121.996	26.4491	213.202	12.6667
87.1714	8.86272	78.5742	12.5688	122.069	28.6942	213.631	51.0882
87.1988	10.2184	78.5849	10.6759	122.105	20.9947	213.917	37.8119
87.2001	11.33	78.5996	13.5852	122.158	22.4932	213.975	39.383
87.219	11.5102	78.6135	13.096	122.23	18.6495	214.052	25.8196
87.225	10.9738	78.6368	9.83739	122.243	25.8563	214.149	39.4092
87.2434	10.4198	78.6501	12.0755	122.333	23.681	214.408	50.8758
87.2638	9.65261	78.693	13.1977	122.405	22.2804	214.505	31.1426
87.2823	11.3459	78.7679	11.5393	122.412	15.6616	214.92	45.8795
87.3074	11.668	78.8685	15.2016	122.446	29.3196	214.997	54.4261
87.3378	9.46934	78.8719	13.9075	122.446	18.7955	215.24	63.9896
87.3595	10.3936	78.8883	15.1994	122.449	16.8119	215.511	14.5515
87.3705	11.0452	78.8901	13.2435	122.465	13.7025	215.57	37.9224
87.3997	10.8581	78.9041	8.4224	122.55	28.0941	215.747	55.7807
87.4396	11.0974	78.9057	13.9763	122.554	14.6658	215.884	38.9478
87.4443	10.4457	78.9666	15.778	122.557	12.6507	215.929	50.1005
87.4915	11.872	78.997	15.3888	122.56	15.7029	216.022	43.0735
87.4932	10.5989	79.0115	12.4245	122.584	26.5319	216.147	58.5989
87.5118	10.3743	79.0142	11.2799	122.594	15.6856	216.197	47.2332
87.5288	10.5253	79.0479	13.3973	122.598	22.4887	216.217	20.2408
87.5955	11.8132	79.0818	12.2531	122.725	16.0162	216.402	59.6173
87.6302	11.1087	79.0973	12.0912	122.802	27.0743	216.411	59.6283
87.6316	11.474	79.1004	11.4298	122.952	13.8171	216.941	56.0432
87.6329	10.0173	79.1121	11.1603	123.017	25.3599	217.09	14.7174
87.6562	10.9777	79.1153	10.8927	123.036	29.2784	217.09	47.7391
87.701	10.1364	79.1197	11.5059	123.147	20.1208	217.094	42.8352
87.719	13.1205	79.1287	12.6494	123.211	19.3271	217.382	33.1449
87.7204	11.1556	79.1754	12.8695	123.236	21.817	217.526	50.2581
87.7396	10.0939	79.1887	13.0411	123.391	18.1335	217.677	57.0505
87.7537	11.658	79.2429	10.8623	123.458	33.1072	217.792	26.4418
87.7628	10.5182	79.2495	15.2275	123.474	18.4326	217.836	75.7512
87.768	11.856	79.2523	12.0155	123.491	12.3831	217.876	36.519
87.8002	10.9624	79.261	11.6288	123.493	20.9237	217.883	48.8862
87.8447	10.5966	79.2776	12.6047	123.588	13.099	217.924	51.0422
87.859	10.5074	79.3191	13.314	123.619	15.0441	218.106	68.7216
87.9838	11.6518	79.3829	13.9663	123.652	31.1721	218.2	30.2019
88.001	10.6118	79.4089	12.251	123.664	16.3337	218.433	46.5873
88.0798	10.3359	79.4217	12.174	123.688	27.2379	218.883	55.3997
88.0922	10.8924	79.4508	13.5842	123.697	19.2952	218.918	46.2151
88.1678	11.0607	79.4717	10.0431	123.769	19.4302	219.026	52.6626
88.1938	10.6917	79.4764	12.4907	123.878	18.2249	219.367	26.5863
88.2197	11.2312	79.4934	13.9536	123.911	19.479	219.498	49.1252
88.2315	10.5801	79.5141	10.7706	123.919	23.5507	219.542	35.9484
88.2896	9.69835	79.5314	11.7813	123.938	36.2178	219.679	41.1139
88.2999	10.4379	79.5387	12.6632	123.949	26.1898	219.922	52.5977
88.3057	11.7951	79.6062	12.4335	123.989	22.9547	219.999	42.8464
88.3082	9.96045	79.6153	11.6758	123.999	47.219	220.081	46.2494
88.3161	10.784	79.6198	12.9678	124.093	16.5383	220.888	45.3311
88.391	10.7656	79.6234	16.0822	124.119	11.5657	220.974	51.5599
88.4323	12.1903	79.6788	11.1713	124.164	12.936	220.998	43.0537
88.4329	9.96119	79.6833	13.6206	124.176	27.422	221.2	38.9553
88.4944	10.8927	79.7261	10.5111	124.211	33.6817	221.317	69.112
88.5525	10.4578	79.7485	11.3548	124.39	27.9242	221.451	69.4154
88.556	12.7477	79.7812	10.9444	124.415	26.5358	221.501	62.7144
88.5597	11.142	79.8065	14.0628	124.435	36.1762	221.772	50.7245
88.5602	11.0899	79.8073	12.963	124.51	16.3697	221.828	26.3249
88.5775	9.77549	79.8157	11.8384	124.538	10.3431	222.058	43.1349
88.5994	11.6364	79.864	12.1283	124.538	40.0539	222.061	62.1056
88.6331	11.7423	79.9106	12.0797	124.555	23.373	223.326	69.6754
88.6854	12.1439	79.9124	11.9782	124.627	17.3184	223.374	43.8352
88.7007	11.6172	79.9805	14.59	124.641	20.6906	223.699	53.6954
88.7136	11.3047	79.9806	11.7311	124.651	29.7038	223.766	56.2172
88.7362	10.6839	79.9936	12.8135	124.664	14.5225	223.93	53.1788
88.7884	10.9583	80.0179	13.3544	124.677	15.5202	224.226	29.5226
88.7976	10.752	80.0542	13.4141	124.755	26.5476	224.51	33.4929
88.7997	11.7065	80.0772	14.1095	124.794	26.311	224.598	44.5487
88.801	10.8573	80.0839	11.7997	124.874	29.7789	224.74	46.2117
88.802	10.9863	80.148	13.9242	124.895	18.4087	224.802	29.1285
88.8223	11.0209	80.2259	10.9814	124.985	19.0687	224.885	51.7979
88.8728	10.1273	80.2801	10.3944	125.022	37.0815	224.977	71.0141
88.9002	11.6017	80.305	12.6366	125.059	34.3457	224.983	44.3848
88.9839	11.3623	80.3529	12.3265	125.123	22.2907	224.985	55.4134
88.9859	11.6013	80.3775	14.2337	125.282	17.2792	225.014	47.9993
88.9925	11.6208	80.3935	13.5165	125.329	24.9761	225.318	31.9603
89.0546	9.78341	80.418	18.295	125.377	27.2722	225.392	45.5826
89.0963	11.2814	80.4346	9.63401	125.483	15.3111	225.765	57.7577
89.221	10.3151	80.5102	18.385	125.541	30.3076	225.823	71.1274
89.2295	9.76058	80.57	12.2721	125.583	19.5076	226.178	49.046
89.249	10.4136	80.5756	11.182	125.591	20.1242	226.278	27.0586
89.2564	10.2383	80.6147	11.9549	125.693	16.8078	226.29	29.5099
89.2604	11.1107	80.6452	10.6141	125.72	20.3491	226.318	59.7003
89.2746	11.3465	80.6534	14.6901	125.811	24.7509	226.344	30.7434
89.2951	10.0853	80.6675	12.8785	125.86	40.9483	226.42	49.6472
89.3428	11.3671	80.7223	16.4394	125.874	19.9969	226.473	30.242
89.3498	10.406	80.7373	13.406	125.901	22.2325	226.525	75.4814
89.4182	11.2094	80.7753	11.4906	125.92	17.4227	226.575	45.2051
89.4427	10.355	80.7943	14.3918	125.947	24.939	226.868	35.0352
89.4613	11.3338	80.8047	10.9332	125.96	22.153	226.911	54.4536
89.4712	10.9279	80.9827	10.3858	126.031	25.3651	226.941	50.6269
89.4757	11.0571	81.0004	9.4508	126.051	16.9042	226.987	46.6422
89.477	10.0845	81.0128	14.4109	126.094	27.1629	227.013	39.3253
89.5095	8.32013	81.0143	11.9478	126.198	21.8718	227.083	32.9218
89.5324	10.6178	81.0241	11.8317	126.249	35.1455	227.106	44.4949
89.5367	10.7175	81.0308	11.3917	126.257	23.3617	227.182	33.5447
89.5689	10.9004	81.0768	12.6006	126.268	15.7816	227.194	51.2712
89.574	9.96233	81.1004	12.307	126.349	27.8958	227.527	30.7481
89.6176	10.8587	81.1175	10.5	126.422	23.8462	227.68	70.6079
89.6533	11.7475	81.1387	11.6542	126.443	16.0318	227.746	61.601
89.6671	10.5228	81.1408	12.9877	126.468	16.1198	227.81	57.1545
89.6857	11.1222	81.1414	11.6714	126.49	47.5629	227.945	26.9773
89.7497	10.5166	81.1556	10.4889	126.558	18.9262	228.048	54.6371
89.7572	10.2545	81.1561	16.0818	126.639	24.0855	228.325	41.4988
89.7973	11.636	81.1688	13.1303	126.694	21.963	228.449	40.3204
89.8111	11.6322	81.1813	12.8881	126.752	21.5436	228.449	50.2061
89.8405	12.534	81.2259	13.6695	126.78	28.3856	228.492	51.2145
89.8531	10.8912	81.2787	10.2289	127	17.2931	228.506	70.3844
89.8663	11.5777	81.2934	12.7926	127.015	18.4352	228.633	45.6907
89.9182	9.26579	81.3301	16.9305	127.074	42.1258	228.869	72.2609
89.9931	10.2912	81.3452	10.0142	127.095	38.5565	228.901	55.9439
90.029	9.70879	81.3684	12.2014	127.129	16.6377	228.985	63.1699
90.0657	12.5469	81.48	11.1686	127.162	27.9609	229.075	40.6919
90.0729	10.2221	81.5047	14.5172	127.168	25.7759	229.13	73.9562
90.0814	11.4081	81.5163	12.4831	127.182	25.0268	229.184	47.39
90.1324	11.7787	81.524	13.3175	127.188	34.7378	229.31	34.6108
90.1471	10.7675	81.5394	9.42222	127.272	23.0419	229.382	56.8064
90.1581	10.8617	81.5591	9.85582	127.33	18.9636	229.521	31.7967
90.2332	10.8943	81.5981	14.7545	127.421	16.5603	229.562	62.177
90.2514	10.7603	81.655	13.1191	127.435	27.0276	229.592	71.7367
90.3159	10.5354	81.7248	13.0696	127.442	14.366	229.597	32.845
90.3167	11.5738	81.7323	11.6734	127.452	28.002	229.598	55.2762
90.3219	10.8199	81.7654	12.0634	127.646	13.7665	229.63	46.6527
90.3477	11.4882	81.7708	15.2163	127.65	14.0925	229.648	38.5829
90.373	9.94937	81.8089	10.7998	127.69	23.8443	229.729	49.4213
90.3998	9.88633	81.914	13.8595	127.704	29.9265	229.759	42.3406
90.4077	9.75	81.9657	14.166	127.757	31.6399	230.193	37.5161
90.4155	10.8499	81.9721	11.8048	127.858	24.9785	230.313	58.7973
90.4427	11.1741	82.0028	9.96904	128.001	27.8421	230.366	47.3606
90.4581	11.0934	82.0038	11.6242	128.003	26.7619	230.506	33.1034
90.5125	11.4087	82.0255	12.8506	128.008	25.5613	230.537	53.9722
90.5406	10.5487	82.0358	22.8285	128.019	13.219	230.54	53.9941
90.5815	11.5223	82.0541	17.7211	128.042	24.0221	230.915	29.6859
90.6045	10.5979	82.0811	10.5989	128.043	20.455	231.243	44.0294
90.6318	10.3723	82.0942	15.9044	128.073	19.4255	231.46	51.443
90.669	10.7694	82.1096	11.8148	128.078	18.5823	231.501	63.0297
90.676	10.2547	82.1885	13.8352	128.093	20.4555	232.074	49.5427
90.7324	11.5028	82.2132	9.87899	128.128	33.3667	232.43	40.6825
90.807	11.7115	82.2219	11.6769	128.182	14.526	232.467	56.1508
90.8086	9.89144	82.2356	9.1041	128.266	24.6184	232.679	52.4619
90.8132	9.38658	82.2383	13.0189	128.307	21.0867	232.872	51.5302
90.8227	11.2483	82.2486	12.5782	128.376	18.2245	233.555	45.079
90.8275	10.3883	82.2662	11.3867	128.386	35.4605	233.619	48.5703
90.8398	10.6973	82.2798	12.3751	128.404	37.1176	233.63	33.4286
90.8661	10.7216	82.282	9.77352	128.419	20.1255	233.657	51.8031
90.8912	11.9226	82.2993	14.4138	128.456	21.8783	233.874	53.1355
90.8912	10.1949	82.313	11.6323	128.504	15.9213	234.003	31.8824
90.8957	10.5823	82.3254	14.6592	128.536	21.2636	234.014	46.015
90.9313	10.4246	82.3316	11.4056	128.554	16.8583	234.021	37.9164
90.9501	11.3663	82.4005	20.1891	128.602	29.8432	234.12	59.641
90.9803	13.4156	82.4186	16.6281	128.86	32.8313	234.186	36.1151
90.9934	12.5608	82.4208	11.617	128.875	19.5967	234.251	37.4487
91.0056	10.2384	82.478	11.6093	128.899	26.0515	234.765	61.9261
91.0163	12.0797	82.4792	12.2705	128.914	36.9314	234.83	28.4379
91.0677	10.6346	82.48	12.3947	128.94	46.2725	234.917	35.3531
91.0789	11.9114	82.4821	13.2214	129.086	29.721	235.103	74.5505
91.1492	11.2322	82.4824	12.9868	129.274	27.5528	235.159	57.8761
91.2745	10.3484	82.4864	12.4212	129.356	27.01	235.272	59.591
91.2775	11.4883	82.5114	11.4796	129.356	40.5926	235.45	32.677
91.2901	10.2586	82.5396	14.7616	129.428	19.9053	235.469	52.1533
91.3078	11.3229	82.5401	11.7912	129.534	43.1328	235.591	29.0508
91.3348	10.6886	82.5413	10.7371	129.54	24.5649	235.638	50.9913
91.3463	11.8434	82.5498	12.8337	129.603	27.4338	235.678	42.6667
91.3485	9.17077	82.5598	11.2038	129.621	22.9646	235.713	30.5504
91.3636	10.7022	82.6004	9.58218	129.668	19.5714	235.746	46.532
91.3686	11.2092	82.6093	13.2818	129.681	29.5044	235.761	36.1755
91.4086	10.4485	82.6129	14.0057	129.73	15.1571	235.832	32.5493
91.4153	9.33186	82.6239	13.7678	129.771	63.0545	235.864	28.2693
91.4883	10.6386	82.6342	11.6525	129.825	25.2474	235.893	51.2723
91.5001	10.0552	82.7008	11.1731	129.847	15.2101	235.971	39.1936
91.5734	10.2926	82.7111	10.8952	129.916	18.8621	236.014	75.5468
91.6244	11.6356	82.7185	11.2779	130.025	10.9492	236.076	15.0518
91.6584	9.9894	82.7345	13.6174	130.026	19.5026	236.13	22.2993
91.6783	10.7453	82.7363	12.1523	130.064	22.7575	236.184	26.0464
91.6795	12.3647	82.798	13.7553	130.089	12.1461	236.35	74.0315
91.7032	11.8545	82.8192	11.398	130.117	24.0129	236.597	42.7674
91.7111	10.6683	82.8454	11.3925	130.18	32.0395	236.695	87.1393
91.741	9.61105	82.8584	12.563	130.293	19.7673	236.704	53.2312
91.7542	10.8903	82.8905	8.95489	130.294	34.5545	237.263	50.8877
91.8313	9.65714	82.9128	11.2984	130.351	26.1411	237.281	58.7752
91.8509	10.3304	82.9217	10.6657	130.387	19.9581	237.473	49.6578
91.9238	10.9411	82.9483	13.6352	130.417	19.7894	237.544	47.5061
91.932	12.0057	83.0145	9.37001	130.577	30.8933	237.793	53.4715
91.9461	10.6922	83.0829	12.1541	130.609	27.5307	237.854	50.9507
91.9601	9.7775	83.1196	10.6263	130.623	29.4021	237.86	61.6581
91.9697	10.7539	83.1496	11.7619	130.63	30.508	238.066	37.4486
91.9794	11.0264	83.1954	17.8023	130.641	17.2015	238.139	41.4224
91.9858	11.5961	83.204	13.7177	130.662	17.3839	238.439	14.2111
92.0207	10.5758	83.2048	12.0064	130.693	35.8132	238.621	12.6426
92.0634	11.6032	83.264	16.7631	130.709	15.917	238.833	61.6657
92.0766	11.431	83.2899	12.7291	130.768	20.1361	238.904	46.779
92.0766	10.9941	83.3055	14.0491	130.772	20.8989	238.909	79.9199
92.0811	10.2746	83.3388	9.78645	130.794	17.9351	239.197	65.4074
92.0879	10.3371	83.3653	14.14	130.963	36.0961	240.221	55.1748
92.1145	11.6444	83.3787	14.6483	130.995	31.5521	240.741	44.1231
92.1414	11.0063	83.38	11.7595	131.041	16.661	240.789	35.9447
92.1446	11.1268	83.3847	11.8713	131.049	17.122	240.991	43.4006
92.1646	12.2212	83.4494	12.8483	131.156	25.8647	241.382	81.8329
92.2032	11.0656	83.4528	10.8182	131.17	27.8397	241.407	39.3347
92.2136	11.0773	83.4781	9.15197	131.203	25.5065	241.742	70.404
92.2157	10.7592	83.5153	10.1713	131.235	43.5956	241.965	55.5553
92.2168	10.9845	83.5319	14.1535	131.286	18.3226	242.047	30.769
92.3077	10.222	83.5539	14.0285	131.292	22.3693	242.155	52.117
92.3614	11.6023	83.6357	12.1688	131.301	18.4275	242.448	52.92
92.3671	10.2602	83.6498	10.548	131.472	23.4779	242.454	24.2029
92.3834	11.2771	83.6536	14.6062	131.51	30.8441	242.46	30.8589
92.3973	10.7975	83.6783	14.9445	131.515	21.319	242.528	43.1914
92.4852	8.49634	83.7286	11.9383	131.54	24.365	242.537	53.495
92.4898	10.5443	83.7544	12.1665	131.574	23.102	242.584	68.0468
92.5119	10.8509	83.7563	15.6804	131.636	17.22	242.618	50.2405
92.6012	10.8405	83.7749	9.92285	131.703	11.7879	242.638	40.2623
92.6235	10.7004	83.7768	15.6504	131.722	26.1033	242.728	72.3032
92.6625	11.9187	83.8223	12.4825	131.807	32.3982	242.864	53.4453
92.6819	12.801	83.867	15.6953	131.835	15.4795	243.077	72.4717
92.7012	11.0235	83.8807	14.3592	131.875	29.5953	243.141	53.0824
92.7402	10.5952	83.8821	11.7875	131.979	29.1352	243.305	50.6329
92.7617	10.1969	83.9029	15.712	131.992	22.1038	243.44	58.6599
92.7745	10.0244	83.9158	11.5009	132.104	19.56	243.51	70.7375
92.781	12.2544	83.9159	13.9576	132.108	10.4123	243.528	29.3651
92.787	10.6826	83.9621	14.0468	132.201	28.3728	243.571	60.9372
92.8468	13.2761	83.9683	12.632	132.202	33.9574	243.587	76.3493
92.8822	9.95099	83.9774	14.2423	132.25	18.3312	243.659	52.4697
92.9338	10.5229	84.0136	11.3859	132.254	28.6724	243.684	44.6846
92.9572	12.0178	84.0458	14.6344	132.284	34.9009	243.706	43.1692
92.9775	10.0315	84.052	13.7942	132.286	17.5955	243.739	56.9079
92.9876	11.4365	84.1075	13.8071	132.323	19.5791	243.929	44.6616
93.0058	10.7386	84.1185	14.6118	132.349	18.378	244.274	68.4275
93.0415	10.7085	84.1423	12.8342	132.381	13.7521	244.421	31.7366
93.0796	10.8887	84.15	11.8221	132.486	22.7844	244.464	76.8857
93.1192	10.8422	84.1781	13.0461	132.515	15.6372	244.517	40.3143
93.1403	11.2846	84.1903	9.90685	132.515	23.5392	244.682	32.5709
93.1528	11.0637	84.2371	16.8291	132.518	28.8827	244.747	76.028
93.2217	11.3349	84.2772	10.6839	132.556	31.3402	244.755	68.9381
93.3456	10.901	84.3719	12.463	132.604	18.3614	244.81	22.2644
93.4409	10.9279	84.375	13.6873	132.726	16.5243	245.063	39.905
93.4786	10.8912	84.3968	13.5203	132.801	30.9077	245.086	58.6292
93.5039	10.9768	84.4034	12.3702	132.816	27.2739	245.321	42.4612
93.5531	9.62162	84.4318	13.62	132.852	28.3007	245.338	52.418
93.5753	10.5549	84.4471	11.0101	132.919	18.1645	245.359	41.0592
93.6048	10.1474	84.449	10.7757	132.955	29.3188	245.379	38.2787
93.6158	10.439	84.4801	10.8043	132.994	21.4345	245.419	61.5472
93.627	9.666	84.503	13.9768	133.012	30.5707	245.593	37.5109
93.64	8.5969	84.5102	21.67	133.171	22.9342	245.684	28.1403
93.6805	9.83855	84.5178	12.4318	133.223	24.8298	245.72	81.7779
93.7012	11.6645	84.5314	10.1098	133.224	17.7303	245.979	41.1811
93.7101	10.2269	84.5416	14.353	133.248	32.7268	246.161	47.6638
93.7141	11.6047	84.5619	10.9549	133.253	18.857	246.364	61.2552
93.7926	10.6338	84.5706	11.4361	133.276	21.9486	246.423	48.2477
93.7941	11.599	84.5808	9.81317	133.346	19.7929	246.716	46.1922
93.7942	10.8211	84.6079	15.6111	133.359	29.5089	246.813	36.0604
93.8106	16.9773	84.7114	12.1036	133.368	13.4574	247.019	24.8021
93.9091	9.10889	84.7426	11.6713	133.376	17.8975	247.139	23.6826
93.9287	11.0215	84.7792	14.0593	133.463	25.9114	247.443	61.9523
93.963	12.5323	84.8136	11.4072	133.516	18.6201	247.634	35.8002
94.0302	10.3068	84.8323	13.2827	133.535	15.1371	247.836	64.0015
94.0692	10.6383	84.8346	9.57629	133.538	25.1188	247.964	51.0723
94.0935	11.1323	84.855	11.8819	133.582	18.0286	248.067	60.6635
94.111	10.9483	84.8767	12.5542	133.611	43.5383	248.111	43.3886
94.1538	10.6717	84.893	8.77522	133.635	15.0466	248.175	49.9667
94.1636	11.0548	84.9332	11.6132	133.735	23.8065	248.186	42.9791
94.1725	10.25	84.9458	12.6017	133.794	21.6786	248.259	46.7377
94.2312	9.60068	84.9708	12.4774	133.867	20.371	248.672	59.4587
94.2944	11.1498	84.9782	9.31241	133.87	17.59	249.077	37.9081
94.347	10.6414	84.9873	11.7135	133.877	30.998	249.452	52.1855
94.3482	11.6766	84.997	14.3108	133.883	26.6058	249.596	47.0294
94.36	10.5281	85.083	10.2619	133.889	21.6348	249.602	44.8191
94.3809	11.8272	85.094	10.8188	133.889	20.7476	249.788	64.9455
94.4217	11.5179	85.1412	12.9494	133.933	14.5055	249.795	46.7635
94.4439	9.6369	85.1474	12.2174	133.94	28.5624	249.887	65.6034
94.4821	11.6402	85.1616	11.6421	134.05	28.5682	249.894	53.1638
94.5101	10.6562	85.1975	10.3916	134.055	25.693	249.929	29.836
94.5133	9.79258	85.271	11.5758	134.133	23.8363	250.128	44.5142
94.5143	10.5108	85.2908	12.5527	134.171	16.8328	250.281	42.3617
94.5639	10.7905	85.3538	10.263	134.2	34.1474	250.297	62.4214
94.594	10.1328	85.4157	12.3504	134.208	28.5913	250.493	69.4034
94.6955	11.0331	85.4241	10.3704	134.225	14.6096	250.548	37.2233
94.73	10.9504	85.4445	13.3522	134.244	21.3308	250.811	46.4658
94.7509	11.7904	85.45	13.7558	134.257	28.0924	251.352	73.7946
94.775	11.414	85.4855	11.1694	134.37	30.4145	251.579	42.6448
94.7822	10.0609	85.4971	12.3651	134.473	28.3241	251.656	42.7122
94.7884	10.6815	85.5177	12.7693	134.502	21.5611	252.265	64.8567
94.8631	11.2833	85.5278	10.4534	134.588	24.4011	252.35	62.7209
94.8636	11.3433	85.5282	11.6957	134.666	26.368	252.447	27.6015
94.896	11.7149	85.6037	14.178	134.73	31.4941	252.49	51.3636
94.9123	11.7087	85.6053	11.7841	134.759	54.3723	252.873	49.9061
94.9201	10.602	85.6421	11.4297	134.955	22.6482	252.925	53.8381
94.9333	10.9139	85.6926	11.6525	134.97	28.103	254.168	55.4558
95.0216	10.1224	85.7075	13.7436	134.999	21.1452	254.327	31.278
95.0925	11.9319	85.7191	10.4137	135.013	23.0269	254.488	36.221
95.1495	11.6283	85.7456	11.8079	135.028	37.4079	254.685	77.8384
95.1583	11.2133	85.7549	11.3044	135.055	43.3623	254.811	24.0992
95.1592	11.8211	85.7599	15.046	135.217	16.7938	254.824	52.1756
95.1893	11.8595	85.8705	11.0044	135.24	20.8345	254.977	48.7006
95.2049	11.5976	85.8965	17.9192	135.268	25.596	255.006	39.661
95.2126	11.1262	85.898	11.7977	135.27	23.0296	255.31	74.3261
95.2224	9.6296	85.904	11.8775	135.271	42.907	255.448	21.218
95.2263	10.5882	85.9945	12.4113	135.346	25.3528	255.926	46.2996
95.2265	12.2661	86.0056	10.9814	135.399	33.487	256.252	32.4115
95.2717	10.5086	86.0071	13.404	135.409	20.4939	256.259	52.3611
95.2822	10.6153	86.0237	11.5148	135.448	17.451	256.29	50.3095
95.2883	11.4092	86.0445	9.96397	135.676	17.4971	256.303	34.0856
95.3524	10.6435	86.0994	11.3512	135.676	21.7812	256.371	24.8104
95.3962	11.9584	86.1365	12.2777	135.792	10.2359	256.442	32.786
95.4121	11.0628	86.1827	11.9364	135.831	20.3539	256.498	79.5992
95.4382	10.7265	86.1868	10.7694	135.875	27.525	256.66	73.6176
95.4464	10.5158	86.1939	13.8794	135.935	20.5398	257.359	24.9396
95.4552	11.9578	86.2111	13.3912	136.015	16.6504	257.539	64.8861
95.4839	11.6707	86.2277	12.6038	136.023	22.087	257.866	79.0769
95.4882	9.38065	86.2283	17.4509	136.074	24.6529	257.959	66.28
95.5233	9.88605	86.2504	11.5258	136.094	43.6141	258.142	42.1733
95.5492	11.4425	86.2664	15.55	136.117	27.4835	258.144	39.165
95.5597	9.97105	86.2764	11.0251	136.166	36.2955	258.352	45.8267
95.5648	10.9904	86.2859	10.8089	136.261	26.6875	258.9	38.228
95.5678	10.3445	86.292	11.9248	136.3	36.1547	258.994	49.9853
95.5788	11.1805	86.391	16.321	136.315	29.3957	259.045	34.2385
95.6043	10.4738	86.3989	12.2618	136.33	18.149	259.09	48.5084
95.6129	10.1642	86.4001	11.8364	136.555	23.1183	259.553	37.4955
95.7112	15.4242	86.4411	12.6496	136.56	16.5567	259.581	46.7567
95.7248	10.6746	86.4512	13.2054	136.583	60.3193	259.757	79.1804
95.7757	11.1293	86.4566	13.4738	136.678	24.5004	259.757	35.3385
95.795	10.7536	86.4633	12.9532	136.694	34.8207	259.828	61.8759
95.8367	10.5729	86.4711	13.4027	136.772	16.8766	259.903	60.843
95.8546	10.19	86.4968	14.3497	136.78	28.4773	260.013	45.9792
95.8649	11.3033	86.5302	11.5464	136.801	33.3763	260.268	43.1619
95.9049	10.1906	86.5314	11.8587	136.816	29.5038	260.431	66.0767
95.9147	11.0123	86.5618	19.5703	136.834	22.7173	260.565	47.5676
95.9432	12.011	86.5653	13.6629	136.975	20.2672	260.581	57.1862
95.9728	11.2476	86.5837	13.3333	137.028	24.9069	260.778	79.0667
96.0038	10.5418	86.6066	10.6134	137.076	36.1259	260.828	70.9737
96.0189	11.8661	86.6077	13.2393	137.099	14.3269	261.518	75.5717
96.0231	9.89089	86.6112	11.2229	137.23	31.2121	261.567	63.9179
96.0534	11.5969	86.6144	12.8443	137.234	19.8103	261.612	30.881
96.0546	11.1564	86.6413	8.38283	137.27	23.6671	261.676	61.318
96.0807	9.16234	86.6417	12.9066	137.304	25.1431	262.171	65.2307
96.0971	10.3207	86.6702	11.819	137.451	21.8612	262.202	48.3634
96.1109	11.5974	86.7265	11.8523	137.458	22.2191	262.272	20.5029
96.1367	9.88073	86.7525	11.1091	137.497	24.2661	262.614	35.2452
96.1394	10.8594	86.7681	13.9052	137.516	22.5866	262.688	74.2372
96.1405	10.0795	86.9111	12.3341	137.525	16.7327	262.754	19.1017
96.1576	12.321	86.9528	11.3231	137.65	28.0838	262.764	49.7475
96.1667	10.0556	86.9717	17.631	137.678	26.9969	262.777	76.1757
96.3493	10.7597	86.99	12.3032	137.728	19.4126	263.194	32.7774
96.4072	11.1948	87.0138	9.70345	137.748	38.5404	263.205	71.8583
96.4465	10.528	87.0242	10.6929	137.818	19.9407	263.435	52.2874
96.4532	10.8008	87.044	13.8554	137.861	22.6855	263.586	25.0978
96.4532	10.6513	87.0727	16.3697	137.88	55.4393	263.608	50.0945
96.468	11.7274	87.0987	13.0867	137.885	29.9306	264.214	49.1948
96.5146	10.8721	87.122	16.1959	137.916	22.1424	264.43	56.6383
96.5402	10.6232	87.1242	11.3591	138.012	36.5319	264.608	62.6652
96.5585	10.226	87.158	10.8575	138.04	23.8905	264.872	34.8234
96.5606	10.6486	87.1656	17.1895	138.07	26.2864	264.966	67.2737
96.5941	10.1663	87.2087	12.3902	138.072	25.9739	265.13	38.9306
96.6494	8.9121	87.2236	12.4418	138.112	32.0769	265.663	51.5412
96.6655	11.1001	87.2284	12.0993	138.136	15.9065	265.664	27.9953
96.6891	11.2669	87.2576	19.4179	138.169	17.4368	265.794	59.2944
96.7065	11.5545	87.264	12.0231	138.322	20.6386	265.895	34.1727
96.7157	10.8294	87.2728	13.0157	138.376	31.431	266.212	57.8598
96.7221	10.3722	87.3337	19.9773	138.377	25.2407	266.491	69.3336
96.7574	10.9051	87.3536	13.0979	138.412	15.6028	266.541	43.1358
96.7698	11.9329	87.3649	12.349	138.621	32.7245	266.717	45.4463
96.7738	9.3749	87.3824	9.78455	138.735	22.4918	266.736	66.9263
96.7785	10.8247	87.3966	12.6974	138.769	41.4129	266.944	85.5394
96.863	12.6444	87.4205	12.2488	138.939	18.399	266.99	65.7981
96.9244	10.9477	87.4244	11.9178	138.998	29.0566	266.993	54.0241
96.9345	11.5871	87.4412	11.3659	139.021	57.3794	267.553	64.3586
96.9582	11.4215	87.4443	11.2053	139.249	23.9943	267.601	42.0262
96.973	12.0218	87.4507	15.1828	139.265	19.1144	267.817	51.9371
96.9752	9.8666	87.454	7.66933	139.273	25.9814	268.121	54.9609
96.9775	10.9632	87.4907	12.0157	139.276	20.3646	268.165	30.5093
96.9906	10.9248	87.5566	15.0744	139.351	23.5276	268.264	69.1081
97.0112	10.9606	87.5846	11.7718	139.364	16.1813	268.545	70.7111
97.0211	10.5229	87.6366	11.7273	139.373	20.8897	268.604	26.4704
97.0535	11.2592	87.6573	12.2664	139.434	13.8215	268.945	56.0207
97.0645	11.2745	87.6693	12.6302	139.561	18.1687	269.066	51.8429
97.0712	10.399	87.6968	11.3895	139.688	21.118	269.452	74.3031
97.1232	10.5789	87.7408	12.3831	139.72	38.5718	269.585	66.2449
97.1398	11.3048	87.7666	13.0176	139.727	32.0649	269.703	66.4601
97.1461	11.7432	87.8364	11.1691	139.731	24.224	269.74	51.6931
97.2129	11.137	87.869	12.5535	139.757	16.8761	269.766	38.1567
97.2275	11.5022	87.8691	13.0428	139.776	16.7275	270.048	56.5766
97.2296	11.007	87.9147	9.35724	139.978	39.4255	270.132	35.7379
97.265	11.2495	87.9404	10.6866	140.018	38.8711	270.216	52.9248
97.2713	10.7408	87.9464	14.9001	140.159	20.4079	270.248	20.0457
97.3239	11.5667	87.9877	10.9487	140.217	26.563	270.455	42.4862
97.3666	11.0075	88	12.0207	140.272	27.7877	270.564	63.3079
97.3821	11.6285	88.0565	13.7294	140.292	37.5455	270.612	61.2748
97.4668	11.7599	88.1005	12.2846	140.373	36.2523	271.129	53.6771
97.4821	6.22807	88.1252	12.683	140.521	35.1606	271.206	80.0137
97.5534	11.0116	88.2042	11.8441	140.567	17.6549	271.209	72.4237
97.6283	15.9344	88.2137	13.3458	140.596	16.6388	271.608	43.8982
97.6995	10.8806	88.2296	17.6897	140.711	28.3161	271.613	36.9448
97.7014	10.8071	88.2453	11.764	140.758	22.8225	271.685	40.0362
97.7419	10.7063	88.2479	13.0895	140.777	35.4794	272.005	40.474
97.8118	10.9357	88.2503	13.2397	140.861	22.4821	272.22	53.1609
97.8551	10.7091	88.2906	13.9755	140.865	15.0628	272.354	60.4506
97.857	11.1498	88.302	11.064	140.907	31.9475	272.444	86.305
97.8776	11.0863	88.3154	10.4774	140.952	28.926	272.646	58.8862
97.8931	10.5854	88.3203	12.9283	141.107	18.9184	272.982	56.6714
97.9026	10.3038	88.3225	13.2079	141.145	24.5418	273.135	53.2502
97.926	11.4738	88.3322	12.7745	141.212	15.0705	273.238	70.3216
97.9407	10.6831	88.356	12.4244	141.224	31.2988	273.359	37.0276
97.9407	14.3226	88.3695	13.1882	141.318	34.0595	273.56	71.5346
98.0395	10.1345	88.3855	11.3304	141.334	15.7278	273.61	43.5914
98.0408	11.5322	88.4088	13.1722	141.348	45.1415	273.641	34.8683
98.0627	11.2417	88.4167	12.7037	141.45	19.3681	273.649	62.6448
98.0679	10.0525	88.4273	11.9341	141.61	23.7816	273.768	79.4334
98.1169	10.6155	88.467	11.4307	141.734	34.4766	273.841	55.5432
98.1321	9.8093	88.4719	15.0842	141.845	33.403	274.021	27.8272
98.1349	10.5367	88.5542	11.5092	141.86	35.3714	274.137	44.5325
98.1364	11.9194	88.6516	14.9124	141.898	33.3105	274.164	59.8088
98.1467	10.3441	88.6584	11.8037	142.032	25.4756	274.203	16.5779
98.1561	12.8193	88.6999	12.0552	142.063	17.2863	274.433	61.472
98.2082	10.8188	88.7071	14.0724	142.168	29.5299	274.48	49.8627
98.2082	9.87749	88.7082	12.2226	142.198	27.3181	274.79	79.9821
98.2394	10.7377	88.7122	11.9471	142.228	10.6256	275.074	38.0589
98.2621	10.722	88.7194	12.4087	142.252	15.7037	275.081	79.366
98.3127	10.8249	88.7328	10.7849	142.27	38.4493	275.355	46.0603
98.3649	10.3526	88.7474	10.5685	142.42	20.55	275.578	48.0291
98.3894	9.8747	88.7546	12.123	142.463	31.9551	275.76	69.7671
98.426	10.4736	88.7693	12.4328	142.469	19.5868	275.797	35.3447
98.462	12.5929	88.7786	11.8183	142.538	32.323	275.877	45.3806
98.4872	10.2185	88.7876	14.4743	142.614	21.3611	275.972	55.7307
98.4981	11.7958	88.8698	14.5366	142.618	26.7572	276.147	53.2932
98.5455	11.7773	88.9722	16.7868	142.648	20.6011	276.265	21.8285
98.5465	11.8974	89.0016	13.038	142.671	18.8324	276.375	85.3412
98.5887	11.9021	89.0183	13.834	142.715	22.6104	276.485	41.8412
98.5914	12.0312	89.0282	9.72231	142.8	21.6187	277.288	50.4895
98.6323	10.5136	89.0352	13.133	142.832	23.2516	277.885	50.4284
98.635	11.0712	89.1031	10.2258	142.843	28.8935	277.977	42.3408
98.6632	10.4741	89.1544	13.92	142.966	30.8606	278.206	52.688
98.6802	10.2564	89.2296	13.9394	143.139	37.5206	278.573	54.209
98.7114	11.1517	89.2766	13.8936	143.15	24.7378	278.609	68.4953
98.7372	10.9899	89.2877	11.1108	143.203	22.2297	278.665	42.8807
98.7394	10.0509	89.3246	11.4073	143.254	18.9484	278.719	56.0203
98.7788	11.4451	89.3255	12.0386	143.262	19.8009	278.821	38.7618
98.7929	10	89.3368	15.5512	143.303	22.9159	278.932	70.1555
98.7955	10.9286	89.3461	16.2284	143.329	27.8207	279.001	29.5498
98.8144	10.7453	89.3554	11.6472	143.341	42.1002	279.165	60.8684
98.8552	9.55665	89.3683	11.3479	143.388	35.4839	279.194	56.5396
98.8797	11.2033	89.3865	19.2192	143.517	14.758	279.349	77.6418
98.8799	11.1042	89.4116	13.4019	143.576	16.3288	279.411	34.739
98.8913	11.8409	89.4401	12.7468	143.702	26.7924	279.678	37.5138
98.9333	10.2496	89.5118	10.7692	143.766	22.777	280.066	22.4167
98.9449	11.1723	89.5128	10.7787	143.931	20.4046	280.134	46.2032
98.9928	11.6886	89.6403	10.3964	143.954	33.4164	280.216	46.4093
99.0163	13.207	89.6437	11.541	144.016	25.3821	280.73	64.9786
99.0171	10.1183	89.6572	10.5494	144.017	18.3486	280.867	68.2295
99.0288	9.27264	89.6609	11.8286	144.069	13.7874	280.873	68.3344
99.0694	12.0216	89.6899	14.7076	144.13	25.8194	280.976	57.8443
99.0751	11.0113	89.6921	18.2595	144.144	27.4496	281.096	30.0244
99.093	11.1618	89.704	12.2486	144.245	15.571	281.203	57.8292
99.1447	11.3434	89.7248	18.4155	144.246	24.3222	281.368	35.4843
99.1687	12.0925	89.7259	13.3521	144.28	18.9967	281.859	49.0458
99.2453	10.8119	89.7901	10.4257	144.319	16.2244	282.082	55.2822
99.3254	11.1599	89.8243	12.1383	144.556	20.0576	282.116	72.0676
99.3505	11.3406	89.8569	12.5497	144.595	21.5893	282.22	29.5919
99.3667	10.1367	89.8767	13.75	144.6	28.0471	282.488	76.7023
99.3944	11.6903	89.8917	22.5036	144.656	13.6482	282.554	45.7767
99.4413	10.9653	89.9045	12.212	144.903	22.5385	282.6	65.7337
99.5968	11.022	90.021	13.9894	144.941	39.8487	282.976	47.1399
99.6102	11.5442	90.0346	11.6449	144.965	20.9071	283.195	42.1452
99.6205	10.5643	90.0412	12.2312	144.991	29.3949	283.278	67.0156
99.6542	11.8979	90.0429	10.6818	145.039	30.8882	283.504	62.8182
99.6842	10.2209	90.0629	14.6452	145.186	25.7272	283.58	34.653
99.7138	8.71053	90.0994	12.9163	145.195	43.467	283.636	82.293
99.7173	11.3183	90.1397	11.9615	145.2	20.0201	283.681	74.1296
99.7802	10.4362	90.1728	11.0715	145.221	26.7909	283.869	41.9873
99.7803	10.8876	90.1912	11.7388	145.31	17.3538	284.062	55.4495
99.8485	10.3638	90.2041	14.1265	145.314	34.0876	284.149	42.3733
99.8591	14.8868	90.2333	11.9606	145.315	39.3575	284.208	37.9158
100.038	10.4887	90.2536	15.0411	145.337	32.3148	284.272	62.2633
100.057	10.6345	90.299	10.8167	145.375	26.52	284.427	68.5457
100.068	10.6525	90.305	14.1053	145.439	17.4562	284.46	59.479
100.081	11.9495	90.3055	15.4648	145.455	27.5072	284.596	39.4214
100.088	12.5262	90.3153	13.2163	145.466	33.0748	285.238	50.3611
100.125	9.4609	90.3481	10.2448	145.477	37.8	285.26	42.8158
100.153	10.0567	90.3576	14.0516	145.529	20.7775	285.544	70.0759
100.232	10.3231	90.3855	11.6063	145.54	15.7186	285.562	41.7979
100.233	11.2336	90.3918	12.0086	145.686	23.0863	285.763	61.7189
100.245	10.6778	90.4686	14.7857	145.73	22.3253	285.887	48.3372
100.245	11.3501	90.4976	10.985	145.937	16.8978	286.09	75.3393
100.252	9.86304	90.5039	12.6315	146.018	27.3659	286.162	56.2616
100.263	10.9089	90.5069	8.5	146.118	31.9	286.628	53.1807
100.28	11.6267	90.5114	14.3788	146.154	28.9937	286.831	62.2565
100.321	10.0373	90.5251	31.5933	146.29	31.576	287.125	54.4106
100.325	10.6212	90.5355	16.1049	146.315	29.1906	287.134	60.7616
100.354	11.9791	90.5511	11.9222	146.316	16.8724	287.378	78.5205
100.383	11.4295	90.5922	9.09833	146.347	23.6902	287.45	47.8121
100.413	11.6284	90.6288	10.8522	146.35	18.2916	287.545	58.9024
100.422	10.6177	90.636	13.77	146.357	15.104	288.057	50.999
100.47	13.1243	90.6694	11.0521	146.402	34.84	288.32	83.9987
100.489	11.1907	90.7033	9.08348	146.465	22.8644	288.339	47.9017
100.51	11.6368	90.7064	11.1381	146.471	20.4812	288.569	71.1931
100.51	10.2903	90.7072	13.053	146.488	25.1268	289.246	69.3557
100.543	11.2491	90.7115	13.6827	146.511	32.345	289.305	38.3716
100.634	11.8017	90.7324	22.8009	146.537	24.1812	289.604	57.1904
100.666	11.019	90.7987	27.4296	146.61	28.7232	289.935	44.8495
100.7	11.2646	90.9055	11.8573	146.636	23.5178	289.964	46.5201
100.796	10.3787	90.9694	9.5544	146.733	27.2219	290.125	55.2518
100.927	9.67923	90.9718	13.8493	146.837	40.0529	290.155	49.4309
100.933	10.5398	90.9782	14.952	146.845	33.8013	290.159	43.701
100.999	10.943	91.0746	11.0594	146.847	27.0741	290.458	61.9838
101.006	10.3449	91.0977	11.4903	146.847	17.6944	290.645	43.6467
101.022	9.6533	91.106	12.7847	146.867	46.2449	290.762	74.5652
101.053	11.0877	91.1335	11.3847	146.875	44.1529	291.014	57.356
101.078	10.9792	91.1868	12.8262	146.935	20.5396	291.136	62.0212
101.142	11.6659	91.206	10.4694	146.945	27.7428	291.353	58.041
101.154	11.7868	91.2198	14.8077	147.019	13.4228	291.367	57.0569
101.179	10.1571	91.3114	16.2769	147.031	27.2394	291.374	55.3782
101.186	10.3719	91.3438	10.9021	147.152	47.2019	291.701	46.8742
101.19	12.164	91.3443	12.0704	147.469	41.0852	291.926	34.1061
101.268	10.116	91.3519	11.526	147.524	19.8278	292.133	62.837
101.272	10.8048	91.3537	12.1543	147.586	41.5015	292.286	49.9665
101.274	11.6615	91.3719	12.0024	147.615	41.3227	292.29	34.3755
101.287	11.4096	91.3725	12.048	147.707	29.8961	292.637	69.969
101.295	11.625	91.3995	13.6096	147.772	29.776	292.709	34.1488
101.334	11.357	91.4231	11.1158	147.786	13.6286	293.042	52.093
101.373	12.8142	91.4261	11.5675	147.806	22.1518	293.059	60.2218
101.403	11.3529	91.4546	15.8315	147.844	26.825	293.201	55.2808
101.432	10.1839	91.4673	22.5455	147.881	19.6982	293.487	54.9668
101.474	10.4948	91.4727	13.0632	148.002	43.3749	293.572	70.6399
101.507	7.89974	91.5443	8.91811	148.048	32.1281	293.773	52.2005
101.663	9.86797	91.548	13.473	148.149	44.1981	293.787	43.9533
101.673	10.4387	91.5959	8.55843	148.161	31.4859	293.817	31.2617
101.689	11.145	91.6577	13.7963	148.19	41.9319	294.221	62.2755
101.71	10.1361	91.6736	8.31236	148.277	36.0344	294.377	53.7468
101.785	9.97758	91.6782	10.2642	148.352	47.1805	294.414	15.201
101.786	10.6333	91.6899	14.1512	148.36	23.7787	294.571	87.7235
101.808	11.2413	91.8086	11.9781	148.43	31.6788	294.736	46.6514
101.838	12.3747	91.8374	9.27747	148.501	23.4449	295.05	44.7929
101.84	9.9948	91.8486	16.1505	148.543	24.2105	295.059	75.7423
101.924	10.8642	91.8645	12.9755	148.632	16.7174	295.65	70.1128
101.955	11.3683	91.9145	11.783	148.633	11.531	295.654	47.7801
101.963	11.134	92.0092	27.2901	148.844	24.2377	295.738	47.7055
101.983	10.262	92.0281	18.8004	148.933	24.4422	295.99	56.2678
102.018	11.6632	92.0381	15.0746	148.957	18.4611	296.029	48.9966
102.032	11.0521	92.0636	10.5949	149.05	22.3832	296.283	51.0172
102.058	13.2326	92.0989	14.1404	149.058	41.6546	296.676	89.1349
102.093	11.0008	92.1474	10.2118	149.087	24.3992	297.021	51.5381
102.109	9.67602	92.1491	11.9428	149.105	21.7564	298.06	84.1303
102.115	11.4919	92.1755	10.6225	149.135	32.1415	298.688	67.8122
102.15	10.8877	92.196	13.9139	149.195	18.5523	298.908	77.4724
102.184	10.1684	92.2712	12.3441	149.235	16.4525	298.959	68.7342
102.282	10.1877	92.3121	11.7072	149.329	31.0542	299.01	74.5157
102.385	11.0232	92.3543	12.1575	149.37	20.0581	299.032	62.5662
102.476	11.989	92.3725	10.5758	149.483	30.0227	299.755	82.5829
102.488	10.4009	92.3978	14.1623	149.499	20.6116	299.812	65.0272
102.512	9.14486	92.4096	12.8311	149.547	40.0589	299.851	54.5851
102.557	11.3058	92.4132	13.0471	149.558	23.9434	300.098	84.4215
102.612	9.22016	92.4205	10.6978	149.7	19.6817	300.285	55.6751
102.634	10.7523	92.4788	20.4878	149.765	34.5639	300.532	75.7836
102.687	10.6716	92.5047	11.2903	149.774	22.3733	300.556	68.0278
102.749	12.107	92.631	14.969	149.802	37.0163	301.292	63.0126
102.79	11.3424	92.6469	14.5025	149.827	28.0743	301.385	51.1958
102.79	10.0747	92.6542	16.4934	149.844	27.4278	301.5	55.9181
102.798	10.8096	92.6615	10.9497	149.909	35.8108	301.845	63.044
102.799	10.7494	92.6638	14.1206	149.941	32.8817	301.867	47.8035
102.814	11.1816	92.682	11.5909	149.981	28.1146	301.91	41.3077
102.825	16.4087	92.7083	11.6262	150.17	20.2072	301.928	47.8335
102.898	9.88786	92.7151	10.786	150.214	27.3626	302.117	62.2121
102.901	11.6757	92.7336	13.7888	150.392	15.0856	302.185	64.3551
102.92	10.5295	92.751	11.7671	150.449	26.0571	302.379	72.4181
102.952	11.4142	92.7801	9.21608	150.46	21.8405	302.699	73.9672
102.956	11.0716	92.7802	11.845	150.528	25.8754	302.989	66.7607
103.022	12.4352	92.8013	13.1086	150.635	20.7003	303.08	77.0199
103.028	11.2286	92.8104	12.6602	150.639	20.877	303.1	60.0743
103.17	10.1235	92.8468	11.1858	150.734	26.8016	303.348	67.6067
103.177	12.1581	92.8713	14.4244	150.759	26.3866	303.548	74.0936
103.194	11.2979	92.8958	9.8434	150.826	21.001	303.677	88.6661
103.246	10.112	92.8978	13.053	150.831	19.9019	303.81	47.4134
103.257	11.3722	92.9659	10.5786	150.835	18.217	304.232	8.91981
103.265	9.84479	93.0106	10.896	150.845	18.1439	304.285	70.071
103.295	10.2824	93.1099	15.0624	150.887	12.6267	304.439	40.6893
103.303	11.4922	93.1206	9.68389	150.915	25.0811	304.642	44.2968
103.372	11.996	93.1303	11.3824	150.968	11.4903	304.906	42.1271
103.376	10.1353	93.1463	15.2877	151.048	22.5604	305.891	67.4011
103.444	10.0604	93.1597	17.3977	151.091	21.0679	306.225	58.2463
103.471	10.5898	93.1679	11.5563	151.115	45.2072	306.939	85.1555
103.476	11.7572	93.1979	14.653	151.117	36.5545	307.296	39.9897
103.478	11.7412	93.2136	26.6502	151.159	26.5403	307.628	70.8287
103.504	10.6512	93.2144	11.3048	151.199	33.8231	307.775	99.9702
103.508	9.3142	93.2578	13.4713	151.325	50.8808	308.009	81.9695
103.531	9.99018	93.2836	13.3136	151.429	19.0747	308.506	49.5254
103.531	9.78667	93.3007	12.8613	151.488	33.447	308.899	94.0929
103.655	9.78998	93.3055	13.2801	151.499	34.7487	308.948	81.0714
103.694	11.1985	93.3117	13.2653	151.505	22.5315	308.988	63.8769
103.715	10.2026	93.3188	13.2697	151.604	13.8682	309.096	61.1653
103.775	10.8153	93.3762	13.246	151.644	31.139	309.24	64.6858
103.778	10.7151	93.4613	16.2322	151.722	27.0652	309.639	59.0121
103.794	10.3597	93.4643	14.8625	151.739	20.15	309.975	26.09
103.796	10.7951	93.4881	11.0706	151.765	29.7417	310.19	93.1849
103.814	10.6538	93.49	8.72842	151.844	23.2177	310.244	55.0806
103.82	10.451	93.5022	10.6484	151.873	18.9469	310.446	64.8576
103.823	12.5932	93.5466	14.2667	151.919	29.6964	310.552	71.5014
103.869	11.9048	93.5586	14.5719	151.961	43.2938	310.592	78.9412
103.877	11.3053	93.5993	12.2354	151.969	38.2398	310.943	52.0999
103.942	9.79096	93.7101	10.5169	151.984	38.3265	311.441	79.5724
103.945	10.2027	93.7129	25.258	152.023	46.7104	311.447	68.0196
103.957	11.3438	93.7373	14.842	152.183	28.1207	311.519	82.0812
104.022	11.3666	93.7576	12.3664	152.192	23.6624	311.817	69.6171
104.064	11.1172	93.7705	11.0752	152.256	31.4647	312.142	83.5213
104.066	10.9626	93.791	10.6293	152.49	26.9465	312.211	35.1125
104.101	12.3064	93.7929	24.8411	152.533	20.8494	312.296	65.3516
104.11	10.8907	93.8086	11.5063	152.634	17.5265	313.391	59.2404
104.134	9.85391	93.8128	15.875	152.649	25.2697	313.533	67.9043
104.161	11.4492	93.8716	20.1616	152.704	47.5443	313.764	64.7487
104.224	10.8185	93.9937	14.0286	152.758	18.5345	313.791	37.7806
104.256	11.901	94.0038	12.9889	152.788	17.7553	314.206	67.4473
104.258	11.2593	94.017	17.5941	152.916	43.7287	314.553	41.2806
104.299	11.7338	94.0244	12.5871	152.947	50.413	314.589	51.8214
104.386	12.6731	94.077	11.2914	153.153	33.9608	314.639	53.7066
104.388	11.1381	94.1016	12.0329	153.262	13.6032	314.798	43.6329
104.414	10.8585	94.1092	13.9387	153.297	53.7317	314.8	100.152
104.447	10.7167	94.1214	10.9163	153.549	54.273	314.939	41.4857
104.478	11.7917	94.1223	18.6603	153.551	20.6269	315.152	47.5929
104.512	10.8655	94.1254	10.2319	153.658	21.245	315.206	60.6847
104.553	10.7322	94.1666	12.1438	153.693	21.7176	315.559	94.0418
104.576	11.2326	94.1778	12.2283	153.74	34.0213	316.245	58.6545
104.624	9.96176	94.2068	26.3423	153.774	31.3486	316.324	53.4409
104.641	11.4837	94.2138	13.0068	153.874	18.1954	316.911	55.5784
104.808	10.1665	94.2822	16.4287	153.886	43.8486	316.97	45.2798
104.82	11.2558	94.2931	11.7517	154.054	33.2972	317.175	40.2417
104.826	11.594	94.3293	12.2004	154.083	29.487	317.198	48.9008
104.85	10.7913	94.3388	13.2206	154.21	22.2036	317.493	71.9898
104.853	11.156	94.376	13.8125	154.289	31.8342	318.002	81.2762
104.861	11.1523	94.3964	11.1417	154.318	38.8048	318.118	65.6997
104.89	10.4805	94.4226	13.119	154.325	20.227	318.435	72.2603
104.893	11.7264	94.5765	13.669	154.375	38.2274	318.936	107.628
104.952	10.2932	94.6123	21.856	154.434	14.0838	319.348	50.621
104.994	11.6871	94.6819	11.704	154.736	22.8737	319.427	62.9012
105.065	10.5488	94.6863	20.7995	154.738	20.6218	319.508	66.8577
105.107	9.74074	94.725	11.5688	154.761	27.9323	319.661	76.2624
105.168	10.6634	94.7265	12.6791	154.77	22.1336	320.016	27.0024
105.179	11.1433	94.7333	9.67647	154.777	26.1359	320.13	52.6119
105.265	12.0445	94.7335	15.2409	154.878	23.9426	320.577	37.4489
105.323	10.9171	94.7502	10.8512	154.888	27.9428	320.649	44.2566
105.392	10.4651	94.7596	11.7129	154.897	35.3952	320.681	54.755
105.434	9.69516	94.7738	13.1271	154.943	18.4929	320.91	56.5477
105.443	11.1862	94.776	13.5316	155.041	23.8008	321.309	92.1467
105.46	9.71602	94.7779	10.8945	155.075	49.3362	321.406	67.4398
105.469	11.0706	94.7811	12.1198	155.114	15.7877	323.283	71.6196
105.503	11.1436	94.8108	10.1116	155.132	21.9316	323.704	52.506
105.53	12.0713	94.8248	16.1648	155.172	25.4114	323.723	46.7089
105.57	13.0556	94.8264	22.3681	155.202	22.8585	324.882	62.303
105.622	10.5673	94.827	12.4584	155.396	36.9989	325.028	80.0101
105.697	9.80568	94.8847	11.1075	155.591	22.1977	325.054	69.7457
105.796	10.9267	94.8888	14.4784	155.725	41.1646	325.085	61.5867
105.799	11.9908	94.92	13.5858	155.742	21.1307	325.468	52.5518
105.822	10.4339	94.9416	11.7536	155.983	40.7053	325.599	77.7738
105.913	11.8708	94.9466	16.1243	156.033	38.0024	325.72	58.3558
105.93	9.91714	95.0037	11.4154	156.093	27.3198	325.855	54.193
105.942	11.213	95.021	18.0417	156.22	25.1706	325.978	69.2289
105.948	10.8767	95.0319	11.1262	156.254	38.7194	326.206	55.5695
105.972	10.6607	95.0927	11.2855	156.347	22.0049	326.434	77.9201
106.035	10.8286	95.1302	7.82773	156.353	41.8054	326.448	77.8503
106.049	12.4949	95.1304	8.96494	156.411	21.2359	326.6	74.2376
106.049	11.4465	95.1893	15.0759	156.53	37.6938	326.712	89.992
106.097	11.1895	95.276	15.071	156.701	37.5214	326.787	56.3798
106.146	11.5216	95.2783	12.379	156.736	45.3996	326.898	70.0366
106.167	11.1643	95.3067	12.659	156.765	32.5239	326.913	73.6363
106.247	11.3856	95.3437	13.766	157.001	35.6539	327.294	62.1446
106.313	10.5481	95.3457	14.1937	157.022	29.3558	327.464	77.3066
106.315	10.8522	95.3636	10.2744	157.063	18.5908	327.973	85.593
106.364	11.1645	95.3767	13.6163	157.067	25.5461	328.132	90.3055
106.421	12.0849	95.3896	10.9767	157.322	26.9235	328.15	34.9242
106.426	10.7827	95.4055	15.1192	157.359	25.0759	328.796	69.6519
106.445	10.9961	95.4091	12.8543	157.43	35.9139	328.824	62.7765
106.459	10.9515	95.4128	19.3993	157.512	16.6528	328.854	56.6185
106.49	10.8159	95.4735	13.418	157.61	45.5089	329.224	62.753
106.568	10.9583	95.482	12.0618	157.629	46.5474	329.818	42.7603
106.622	11.3785	95.4864	11.1499	157.635	24.187	329.973	81.0167
106.622	12.7868	95.4993	12.031	157.657	19.1711	330.026	72.3424
106.719	11.5848	95.5212	12.4054	157.681	29.8304	330.227	98.0532
106.741	12.0129	95.5647	11.5553	157.691	31.2838	330.291	87.436
106.771	9.4977	95.5849	12.1055	157.776	26.3949	330.536	33.4274
106.775	9.97677	95.6145	14.3422	157.79	36.2679	330.736	38.3136
106.854	12.8861	95.643	13.8923	157.805	58.548	331.004	42.5102
106.868	10.9125	95.6629	11.7743	157.858	30.254	331.234	92.5332
106.878	11.1012	95.6646	17.606	157.935	45.9742	331.863	35.7861
106.884	10.9941	95.6901	12.5451	158.004	17.7531	332.089	49.0319
106.906	10.7126	95.7042	11.4937	158.114	44.0728	332.413	65.0825
106.931	9.76698	95.723	16.4321	158.215	31.4992	332.434	48.3378
106.957	10.3944	95.7291	12.2735	158.264	36.3692	332.607	43.4074
106.97	11.4128	95.7703	10.3636	158.272	23.6838	332.972	66.6495
106.991	10.6762	95.8271	10.3711	158.347	35.6678	333.09	23.3301
107.042	10.6833	95.9345	11.3531	158.376	52.664	333.16	65.3062
107.085	11.5242	95.9385	10.4897	158.393	50.8664	333.318	44.03
107.106	11.8059	95.9728	15.6367	158.408	19.1947	333.396	65.6209
107.119	10.9202	96.1538	16.1936	158.427	25.2873	333.824	47.1956
107.15	11.7559	96.3295	12.6065	158.533	45.5212	334.717	61.7397
107.16	11.25	96.3322	12.0178	158.632	25.7987	335.221	53.0603
107.163	10.5457	96.3449	11.4782	158.686	29.7554	336.096	60.925
107.278	11.3949	96.3518	15.2757	158.793	23.9065	336.737	88.1958
107.319	11.1502	96.3784	14.2285	158.841	31.6416	337.074	47.2808
107.413	11.9096	96.3954	12.2804	158.923	26.8468	337.738	52.7619
107.443	9.93586	96.4249	10.4218	158.932	19.7631	338.284	71.6742
107.516	11.1943	96.4463	11.8711	159.089	19.8424	338.754	74.9931
107.543	11.8857	96.447	13.2572	159.324	33.5091	338.797	79.157
107.559	10.4919	96.472	12.6659	159.334	19.7555	339.055	92.2505
107.598	12.3734	96.5037	20.4399	159.414	49.1407	339.367	69.7521
107.686	10.6568	96.5109	17.0815	159.628	30.4401	339.551	43.9524
107.686	10.7177	96.524	17.6182	159.678	18.3182	339.725	56.6154
107.704	9.96947	96.5256	12.5342	159.796	18.893	339.915	57.9849
107.772	11.3383	96.6455	13.5369	159.811	17.3787	340.115	42.7676
107.778	11.2073	96.6709	17.3019	159.929	38.4784	340.177	85.3052
107.817	12.0019	96.7196	11.4607	159.952	22.8502	340.338	87.0833
107.826	10.4106	96.7715	12.9747	160.029	23.6487	340.471	53.9698
107.877	10.0099	96.8072	12.8895	160.179	38.8358	340.986	69.7423
107.924	10.5544	96.8986	13.2654	160.403	29.1797	341.228	60.9146
107.958	9.37048	96.9776	12.0445	160.468	19.9006	341.659	90.7234
107.977	10.7343	96.991	12.7946	160.538	33.8027	342.021	50.3223
107.992	10.25	97.0775	10.4576	160.694	16.5382	342.256	31.3263
107.999	10.0995	97.1198	14.5773	160.699	15.3977	343.102	44.3464
108.009	10.7265	97.1269	14.49	160.719	23.1086	343.812	60.4934
108.01	10.2457	97.1641	10.4232	160.846	17.0536	344.131	94.0755
108.105	10.4763	97.1699	11.6151	160.895	58.3574	344.148	60.2561
108.194	11.001	97.1856	16.6994	161.053	55.5126	344.36	66.2512
108.202	11.7841	97.2632	16.016	161.097	19.5205	344.38	74.8218
108.256	10.5441	97.2805	12.8264	161.146	33.5104	344.754	67.0532
108.302	11.981	97.2895	11.7891	161.194	38.9655	345.639	68.0256
108.348	10.8495	97.294	14.6339	161.231	26.5982	345.699	62.8153
108.387	11.4698	97.3499	11.1854	161.33	12.202	345.782	59.812
108.407	11.5732	97.3536	17.7762	161.62	25.0373	345.864	51.7526
108.441	11.236	97.3841	17.987	161.682	22.8904	346.163	74.8497
108.447	12.2671	97.3999	30.9191	161.917	28.632	347.126	64.7792
108.475	10.5896	97.4235	14.2347	162.018	45.2863	347.443	43.2164
108.489	9.84756	97.4532	11.7049	162.202	25.1014	348.225	62.8193
108.517	10.7074	97.4687	15.0019	162.257	32.9935	348.515	57.1065
108.529	11.282	97.4714	13.0832	162.307	19.4848	349.229	76.7495
108.535	10.9449	97.4737	10.7491	162.313	26.2672	349.511	64.7236
108.582	10.0796	97.4804	10.0093	162.415	19.2042	349.515	77.014
108.684	8.8532	97.4869	25.4919	162.432	39.2244	349.525	80.0877
108.729	9.44954	97.505	8.74499	162.487	36.8816	350.963	56.6786
108.785	12.5531	97.621	10.7418	162.488	37.5174	351.111	81.5781
108.899	9.02917	97.6471	10.5527	162.554	47.3019	351.113	84.1984
108.965	11.1204	97.6518	11.899	162.724	42.7661	351.138	69.084
108.986	11.3636	97.6627	12.7748	162.746	33.8859	351.239	66.3212
109.012	10.557	97.6967	14.2245	162.79	45.5793	351.524	41.8934
109.069	9.76892	97.7342	11.609	162.826	13.8211	351.747	99.2984
109.097	11.0443	97.8579	11.3026	162.881	32.1447	351.767	55.8842
109.126	10.442	97.9024	12.6659	163.215	35.9548	352.183	51.9583
109.15	11.2237	98.0022	12.3589	163.39	36.2585	352.282	90.8643
109.198	11.4492	98.0885	14.0563	163.392	29.3856	352.5	56.8197
109.213	8.46618	98.089	13.4096	163.488	34.0758	352.532	53.9487
109.258	10.0596	98.1222	12.1111	163.639	32.9534	352.601	77.7036
109.275	11.239	98.1648	9.71871	163.784	30.2096	352.612	82.6281
109.28	9.85714	98.165	10.9465	163.847	18.5267	352.804	46
109.346	12.4605	98.2218	14.3313	163.873	14.7127	353.528	82.0556
109.478	11.455	98.2305	13.3616	163.898	43.1089	353.637	91.9934
109.541	11.1036	98.2727	26.3386	163.94	25.9652	353.699	46.7486
109.551	10.746	98.2841	12.6471	164.054	28.8957	353.75	78.5935
109.554	10.8611	98.2851	13.0229	164.171	30.5148	354.35	70.013
109.578	10.9125	98.3261	17.1713	164.413	22.0276	356.069	50.9351
109.67	10.6627	98.3974	12.6926	164.549	29.0056	356.403	79.4644
109.735	11.4686	98.4116	19.5874	164.693	40.9141	356.815	54.9939
109.758	10.8302	98.4325	12.7217	164.749	32.8312	357.946	92.5188
109.802	10.7368	98.4333	13.5796	164.818	11.3243	358.042	53.4548
109.833	11.2251	98.4659	11.3436	164.939	50.6725	358.81	54.2674
109.834	12.6713	98.4725	18.4305	165.036	20.7286	359.273	93.1765
109.85	9.91552	98.4946	10.9404	165.071	47.4642	359.689	60.201
109.889	11.0866	98.5375	13.1149	165.321	24.5271	359.925	82.7762
109.891	11.0518	98.5789	12.1321	165.351	36.082	359.96	72.4207
110.005	9.64455	98.5831	10.8949	165.441	29.4799	360.78	56.7127
110.056	10.757	98.6261	12.3169	165.59	16.8223	361.221	55.6248
110.087	12.9365	98.648	12.8022	165.617	27.8198	362.481	87.0886
110.093	11.2683	98.68	11.5799	165.708	33.1533	363.271	78.4256
110.18	10.5178	98.7266	13.093	165.723	20.2539	363.547	63.9438
110.219	11.2703	98.8376	10.7253	166.065	26.418	363.905	122.649
110.234	10.8183	98.8591	11.8358	166.167	27.0503	364.059	25.3439
110.26	12.2162	98.8908	13.5252	166.218	20.1532	364.216	95.8453
110.353	11.8665	98.9043	17.9517	166.309	23.5464	365.402	67.7344
110.359	9.46238	98.9469	10.2321	166.439	21.8619	365.575	52.2342
110.399	10.9703	99.0346	10.2644	166.472	26.0239	365.616	104.075
110.411	10.7751	99.1211	32.9048	166.487	25.8617	365.659	65.0984
110.412	10.1056	99.143	12.5616	166.573	24.4736	365.744	83.09
110.465	9.46361	99.1919	13.9705	166.773	26.6197	365.78	82.2767
110.504	9.84437	99.2152	11.1777	166.782	29.0836	365.852	80.9364
110.524	10.2916	99.2472	16.469	166.787	24.9244	365.984	79.9429
110.536	10.3188	99.31	10.664	166.811	57.0299	366.246	121.612
110.562	10.9211	99.318	14.2489	166.945	25.9134	366.474	95.6506
110.598	12.6732	99.3908	13.5292	166.947	25.2434	366.672	97.8884
110.76	10.5222	99.4062	10.6237	166.998	57.137	367.037	73.0611
110.762	8.41078	99.4217	12.223	167.028	46.0205	367.069	87.8252
110.778	9.55902	99.437	15.6352	167.119	15.452	368.091	97.2939
110.779	10.3057	99.4614	28.6831	167.268	44.4961	368.182	63.0874
110.803	11.9623	99.493	12.0729	167.454	51.7632	368.209	67.2148
110.877	10.9344	99.5002	19.6028	167.597	2.65782	368.262	61.6045
110.914	11.4843	99.5032	12.4531	167.676	59.5153	369.013	36.566
110.929	9.99628	99.514	24.2227	167.744	19.0762	369.017	100.843
111.032	10.2861	99.5459	14.2806	167.779	28.2114	370.241	48.0149
111.1	11.5018	99.5897	18.3098	167.956	20.0517	370.463	99.9486
111.1	11.5741	99.5982	11.8625	167.957	19.9533	370.65	62.8241
111.11	10.6692	99.6064	12.1974	167.967	24.8081	371.352	69.7211
111.14	12.5605	99.6076	11.2887	168.01	23.1003	371.377	92.7926
111.16	10.8749	99.701	12.3349	168.098	52.6267	371.446	66.3823
111.235	11.829	99.7209	14.2755	168.108	36.815	371.46	89.5421
111.274	9.75239	99.7212	11.2987	168.114	31.7232	372.677	82.7712
111.283	10.4669	99.8118	11.1716	168.162	21.7137	372.899	70.315
111.307	10.8438	99.8228	11.4942	168.274	40.1192	372.958	19.6255
111.319	10.6048	99.9189	15.0123	168.34	31.3305	373.083	50.2284
111.359	10.2479	99.929	22.3556	168.392	52.6968	373.115	67.9281
111.381	10.5714	99.9308	11.1578	168.406	13.6829	373.553	99.9807
111.415	10.5506	99.9395	13.8557	168.434	17.6449	373.579	37.0258
111.446	12.0981	99.9476	14.7432	168.447	17.6889	374.748	74.4264
111.601	10.0856	99.9857	12.9073	168.49	26.8538	375.176	67.7687
111.615	9.60469	100.011	11.3462	168.536	41.4336	375.806	36.1339
111.688	9.66544	100.052	18.4099	168.548	32.883	376.135	73.1226
111.689	11.819	100.067	12.8919	168.6	38.5472	376.829	79.1761
111.748	12.5396	100.092	14.5009	168.621	32.6286	377.178	58.3445
111.815	10.452	100.111	13.0075	168.661	54.5385	377.515	71.0383
111.83	11.7678	100.119	11.4292	168.822	24.6803	377.966	57.0337
111.848	10.177	100.119	13.9046	168.895	9.91938	378.01	70.9075
111.959	10.9084	100.144	11.8061	168.995	36.1301	378.142	61.002
112.09	13.0524	100.17	11.3563	169.032	32.3884	378.437	73.8978
112.147	12.3428	100.179	14.1829	169.036	38.1843	378.442	46.7647
112.245	11.1536	100.18	18.0992	169.131	36.5131	378.832	61.9541
112.304	11.056	100.216	13.0986	169.197	23.7912	379.136	73.8724
112.415	10.6761	100.24	12.2338	169.22	21.6786	379.249	134.792
112.46	10.2964	100.242	11.1865	169.234	67.8153	379.446	92.6677
112.578	10.3324	100.248	12.8839	169.311	24.5446	380.019	39.1185
112.643	11.2071	100.259	13.6863	169.329	36.6602	380.253	76.284
112.673	10.2475	100.289	12.521	169.412	25.5384	380.285	70.5109
112.77	12.8136	100.345	18.4688	169.51	41.3386	381.359	51.4333
112.792	10.8912	100.411	12.5221	169.772	31.7226	381.424	38.2667
112.828	10.9757	100.437	12.9381	169.789	27.6208	381.558	77.5667
112.855	10.8767	100.46	14.0495	169.8	27.3319	382.599	49.8412
112.858	12.0389	100.517	10.4575	169.905	27.9465	383.128	64.5533
112.938	12.2288	100.542	11.169	170.128	31.8657	383.491	59.9265
112.948	11.8235	100.559	13.8726	170.235	17.9964	384.376	34.258
112.962	10.7704	100.615	12.6675	170.461	46.2516	384.989	82.0817
112.979	11.6029	100.62	18.7035	170.541	39.1398	385.66	103.929
112.994	10.9274	100.708	8.38705	170.55	26.5746	385.862	74.3265
112.994	10.9556	100.729	12.951	170.623	21.9203	386.316	47.0546
113.004	11.9403	100.765	12.9988	170.655	26.1474	386.969	43.4062
113.051	12.3393	100.797	12.1055	170.795	34.4414	387.257	34.621
113.059	10.3571	100.847	14.444	170.8	21.5515	387.283	85.115
113.06	10.9107	100.864	17.1013	170.87	27.4448	387.292	42.4821
113.066	11.6548	100.91	15.6199	170.885	24.4082	387.781	78.8988
113.068	11.0474	100.926	14.5825	170.9	16.8172	388.001	73.6307
113.068	11.3892	100.947	15.2192	171.059	24.9274	388.052	87.7118
113.15	11.398	100.957	17.2931	171.201	19.3941	388.479	48.1857
113.173	11.7443	101.008	12.1082	171.409	25.6432	388.807	72.2843
113.236	11.646	101.061	16.5276	171.477	31.2204	389.952	61.5424
113.272	9.69713	101.064	13.5762	171.615	16.0455	391.425	62.2481
113.307	12.1367	101.156	14.0145	171.698	33.1346	391.432	57.4286
113.329	11.0208	101.173	10.9277	171.722	25.6972	391.72	56.2347
113.341	11.2248	101.18	12.7215	171.793	15.2116	391.856	65.7333
113.348	11.6768	101.18	13.7807	171.982	23.4188	393.036	76.5986
113.359	10.2914	101.186	15.8465	172.028	26.4313	394.4	80.4661
113.369	10.4648	101.246	14.5528	172.068	28.4063	394.684	61.028
113.432	9.46566	101.252	11.9133	172.341	35.4295	394.816	79.7909
113.607	10.5745	101.272	10.8859	172.453	26.0164	395.181	34.6205
113.62	10.6724	101.318	14.0144	172.493	29.3208	395.187	73.5134
113.664	9.98992	101.321	13.185	172.495	20.3936	395.69	51.3854
113.715	11.5624	101.325	14.081	172.516	38.9829	396.406	62.3669
113.725	12.0683	101.33	9.07518	172.564	23.8776	396.649	47.9977
113.764	11.3854	101.388	12.5446	172.583	29.4084	396.684	69.6643
113.894	10.7715	101.454	16.4488	172.676	21.055	397.173	37.1975
113.925	11.9621	101.464	13.2288	172.774	55.3704	397.355	88.0545
113.974	10.9784	101.472	13.0945	172.875	23.3649	397.702	48.5425
113.985	10.5622	101.48	15.1744	172.895	28.4378	397.816	69.89
114.027	11.3139	101.489	16.3387	173.04	11.2111	397.969	84.1064
114.039	10.2876	101.542	17.6853	173.297	29.6467	398.972	92.6762
114.066	10.7843	101.625	14.4795	173.523	34.0077	399.476	55.043
114.15	10.7452	101.633	11.8735	173.588	33.9417	400.391	76.5832
114.259	11.2528	101.641	13.5601	173.788	34.8655	400.418	62.4515
114.304	11.7642	101.678	13.5748	173.864	22.8088	400.596	52.7522
114.41	11.7175	101.688	12.4206	173.871	28.1478	402.459	70.8927
114.476	10.6678	101.695	14.26	173.962	17.5768	402.747	77.0623
114.485	10.8067	101.751	22.8398	174.054	39.74	402.989	84.7232
114.594	12.9365	101.752	13.0336	174.081	39.1851	403.284	55.7424
114.607	11.0191	101.868	11.06	174.223	47.7053	403.607	92.3125
114.613	13.8773	101.906	17.116	174.247	54.1788	404.361	66.9356
114.653	10.9002	101.91	12.4729	174.467	21.7669	404.467	97.0338
114.676	10.8804	101.921	15.6716	174.657	26.0887	404.969	59.4254
114.718	10.6247	101.953	14.1757	175.128	27.3526	406.943	69.9515
114.727	10.6204	101.974	12.2092	175.131	39.5469	407.85	107.527
114.727	9.41959	101.996	13.8035	175.253	46.4706	408.082	40.3677
114.73	10.7198	101.997	11.0288	175.256	35.8795	408.2	97.513
114.776	12.0075	102.004	12.9814	175.359	14.1793	408.514	77.3842
114.8	11.2494	102.034	13.7502	175.475	26.9097	408.829	131.867
114.938	10.7517	102.126	13.6466	175.535	23.6776	409.606	75.0483
114.985	11.9801	102.168	12.7043	175.548	25.1855	409.632	68.7035
115.188	10.8318	102.195	12.1296	175.693	22.9496	409.938	81.5204
115.281	11.6061	102.233	17.5562	175.764	23.7382	410.003	120.197
115.289	10.0201	102.253	11.5595	175.839	38.9878	411.025	67.3218
115.306	11.0124	102.277	12.2473	175.848	43.362	412.263	110.318
115.344	12.1208	102.293	10.6448	176.46	19.2032	413.267	90.4379
115.507	12.027	102.294	12.7423	176.828	33.9515	414.392	106.945
115.514	11.1201	102.324	14.3774	177.26	39.0325	415.976	54.3345
115.551	9.83539	102.336	10.9668	177.357	29.7234	416.266	98.3939
115.553	10.0784	102.345	14.0663	177.464	40.7034	416.652	53.3535
115.588	11.3368	102.384	12.4979	177.548	16.1228	416.867	68.9488
115.624	11.2067	102.385	14.1747	177.59	36.4183	418.044	54.444
115.678	10.9853	102.39	16.198	177.711	22.3654	418.104	103.335
115.71	11.2938	102.399	15.3832	177.772	38.431	418.613	99.4063
115.763	8.72737	102.46	11.0568	177.843	17.3103	420.185	59.8864
115.78	10.6119	102.487	10.2652	177.847	48.6857	420.834	72.6442
115.816	11.3446	102.503	12.8095	177.884	26.8809	421.1	74.0923
115.819	9.80507	102.529	18.1154	178.244	14.2548	421.641	85.3981
115.9	12.5942	102.594	9.5113	178.358	27.4109	422.007	43.467
115.924	10.6441	102.605	13.6484	178.526	14.3013	423.488	104.841
116.019	10.7899	102.615	13.8064	178.698	32.1556	424.746	75.5286
116.051	8.90037	102.647	13.71	178.803	28.1389	424.934	74.3943
116.062	10.7293	102.771	10.8204	178.874	41.7523	426.053	40.6269
116.066	11.9714	102.78	10.9633	179.469	43.9794	426.129	56.0965
116.073	12.5052	102.811	10.207	179.555	26.2713	426.243	80.7332
116.13	10.4985	102.816	16.07	179.673	28.2734	426.749	69.3157
116.136	9.61264	102.817	11.8644	179.709	25.8854	426.774	104.759
116.175	12.2517	102.831	27.2917	179.793	29.6091	427.449	37.8583
116.211	11.8692	102.837	14.1635	179.854	49.4708	428.44	51.0337
116.233	12.016	102.889	12.0316	179.873	32.6276	429.969	98.8516
116.234	10.9349	102.896	12.1622	179.91	33.4086	430.201	64.0934
116.285	9.91399	103.043	17.3056	179.969	44.7375	430.263	101.186
116.303	11.3047	103.071	19.866	180.169	26.2274	431.03	105.963
116.322	9.41741	103.216	16.804	180.761	35.388	431.543	55.6352
116.324	11.2494	103.251	7.93958	180.977	25.1345	433.435	96.6563
116.396	11.249	103.302	10.6868	181.108	45.2966	434.583	139.875
116.408	11.8718	103.318	11.511	181.123	19.4438	434.678	102.53
116.41	11.3415	103.372	13.5306	181.155	16.093	434.685	99.3638
116.458	10.7749	103.379	10.5714	181.237	51.4583	434.944	88.3483
116.661	13.9896	103.4	13.4961	181.328	47.7222	434.983	111.04
116.663	10.4598	103.421	12.5214	181.443	34.5495	435.219	108.854
116.679	10.0852	103.46	13.0872	181.695	25.9525	435.522	110.24
116.687	11.9767	103.476	11.6355	181.755	61.8781	436.36	69.3123
116.793	10.8669	103.524	15.0952	181.99	30.0333	437.025	55.4557
116.804	10.7415	103.548	22.1018	182.002	23.8012	437.08	134.351
116.838	10.7236	103.621	17.4214	182.039	39.7679	437.162	54.9153
116.938	9.94022	103.795	12.1794	182.071	18.7056	437.397	53.8139
116.946	10.369	103.865	19.7009	182.197	18.374	437.409	91.9021
116.952	11.2492	103.876	13.0614	182.266	40.3461	437.836	160.412
116.987	10.5	103.912	15.8678	182.302	31.4027	438.253	58.5995
117.007	11.6338	103.928	12.8494	182.582	38.6571	438.606	98.0513
117.048	12.0203	104.009	14.5016	182.602	39.5146	439.655	80.0884
117.052	11.4176	104.054	13.7502	182.74	23.8563	440.763	77.9968
117.11	10.0645	104.07	12.9346	182.789	25.4313	442.607	98.2983
117.114	10.5058	104.108	11.4359	182.838	28.4387	442.861	80.3261
117.13	11.6648	104.147	13.2823	182.881	25.4074	443.378	47.3654
117.155	11.994	104.348	13.8932	182.901	37.264	446.711	60.8346
117.168	11.2241	104.379	12.725	183.083	52.3692	449.363	102.773
117.178	11.4921	104.395	13.1754	183.222	52.9477	449.726	72.9593
117.218	12.2595	104.412	15.9437	183.334	17.338	449.942	90.1078
117.256	11.4301	104.417	13.6116	183.783	58.6873	450.011	34.552
117.351	11.8236	104.451	14.824	183.82	69.0971	450.138	78.9427
117.446	11.7759	104.581	20.1886	183.822	42.246	450.198	79.2387
117.488	11.0975	104.685	12.7306	184.034	12	450.283	103.387
117.498	10.0595	104.693	25.3194	184.173	45.9228	450.957	53.0238
117.502	10.2854	104.707	11.7443	184.236	11.0347	451.029	98.3123
117.549	9.78601	104.731	11.8642	184.495	29.2987	452.565	75.1404
117.581	8.97597	104.781	18.4124	184.59	2.96899	453.894	57.9655
117.598	11.7218	104.793	11.8602	184.591	22.0159	454.023	63.2552
117.634	9.97887	104.84	12.5175	184.611	51.0249	455.081	64.9524
117.635	11.5637	104.928	30.6891	184.611	36.2839	455.953	103.846
117.655	11.539	104.985	14.1792	185.183	57.1125	456.563	81.0542
117.696	9.95373	105.004	10.9984	185.193	36.2515	457.346	81.3012
117.784	12.3163	105.008	19.5766	185.607	38.1348	457.442	80.2003
117.83	10.2727	105.021	16.1884	186.278	21.9938	458.636	95.2798
117.85	10.461	105.079	11.9424	186.407	16.358	458.81	84.268
117.981	12.0243	105.097	12.3926	186.933	40.2573	458.816	35.2941
118.055	14.7484	105.148	11.1883	187.137	39.8647	460.489	107.567
118.134	11.6688	105.165	14.5032	187.314	47.5542	461.704	39.9713
118.138	10.2497	105.216	15.4948	187.355	34.5065	461.75	64.0731
118.22	10.7035	105.221	12.3824	187.555	21.7003	462.207	57.4098
118.234	10.8231	105.234	15.9767	187.984	23.2644	463.817	72.8602
118.254	11.2506	105.256	17.5852	188.065	22.68	465.286	88.6426
118.29	11.2346	105.339	13.6735	188.224	45.8273	467.124	96.1785
118.321	12.5631	105.356	11.7876	188.341	20.0548	468.146	96.0722
118.398	8.25732	105.414	12.4862	188.489	18.6682	468.705	64.0499
118.412	9.41558	105.462	10.964	189.325	38.0508	468.907	98.3834
118.42	10.8927	105.492	14.856	189.382	56.4628	471.608	40.4756
118.443	11.4913	105.505	13.0761	189.482	15.981	472.234	97.4976
118.555	8.38889	105.506	17.1014	189.565	62.4854	472.405	62.6221
118.588	11.2987	105.586	13.4627	189.612	43.6101	474.248	72.2072
118.603	11	105.639	13.4961	189.876	19.3469	474.553	73.6763
118.623	10.4683	105.732	14.7313	190.114	46.3632	475.621	61.1726
118.684	10.811	105.749	13.2024	190.432	24.437	477.7	67.3846
118.693	11.103	105.753	17.0086	190.541	63.4532	478.584	94.3222
118.721	10.2821	105.781	11.6935	190.795	18.5238	479.15	111.774
118.747	10.5593	105.79	12.7956	190.929	28.047	479.885	103.245
118.801	10.5553	105.802	12.6462	190.986	39.5646	479.886	87.8616
118.826	10.3714	105.826	13.0979	191.05	41.1504	481.178	97.1844
118.883	11.8145	105.834	12.2141	191.218	26.1147	484.992	141.77
118.886	11.9135	105.875	10.9187	191.666	31.1673	486.312	55.1725
118.945	12.3585	105.933	15.3778	191.965	30.2039	486.78	73.6878
118.969	11.0478	105.983	8.4922	192.295	71.404	487.712	93.3926
119.066	11.4944	106.016	22.6392	192.296	28.5162	490.499	108.53
119.099	12.6999	106.059	12.2052	192.397	42.9555	491.49	104.04
119.121	12.8721	106.093	11.9367	192.913	22.1568	492.108	112.818
119.126	11.7672	106.133	18.4352	192.985	45.3164	495.102	63.999
119.19	12.0738	106.219	13.5263	193.084	33.1226	498.605	86.0018
119.281	11.0456	106.231	12.9083	193.335	35.1942	499.879	46.5118
119.328	10.9861	106.239	11.0822	193.348	24.5068	502.34	64.3405
119.34	12.3805	106.295	10.6225	193.368	29.3694	502.494	67.4487
119.553	11.4446	106.344	12.524	193.543	30.5074	506.598	97.1443
119.581	11.0647	106.346	14.8526	193.623	28.337	507.164	46.3833
119.587	11.1111	106.433	15.0826	193.74	30.9175	507.177	77.2273
119.662	11.4293	106.569	11.8007	193.819	36.6037	508.183	109.124
119.666	12.7849	106.689	10.8106	193.955	39.1718	508.262	61.3191
119.808	11.5506	106.716	15.4477	193.973	47.8171	510.009	70.1387
119.855	12.4889	106.769	12.4034	194.425	45.5953	510.685	126.871
119.988	9.58416	106.883	12.85	194.589	45.8359	511.73	65.7132
120.001	11.1184	106.903	14.0123	194.629	27.89	512.026	57.0117
120.047	10.1415	106.913	13.3537	194.832	40.4478	512.159	67.1334
120.048	10.8688	106.941	9.157	195.314	40.9277	513.25	106.92
120.055	10.9305	106.979	11.5703	195.33	43.6843	513.512	101.475
120.093	9.74322	106.998	9.32864	195.627	25.4752	513.713	107.383
120.139	12.4502	107.004	9.75362	196.063	39.185	514.113	71.5133
120.257	10.6959	107.068	21.4583	196.456	50.2647	517.264	109.276
120.264	11.009	107.068	12.2035	196.488	14.0564	517.32	62
120.266	12.0512	107.089	15.9475	196.564	39.1245	521.958	88.5078
120.287	10.6326	107.192	15.8778	196.638	23.9704	523.998	122.568
120.476	12.0137	107.273	12.0592	196.775	38.3173	531.325	124.644
120.502	10.369	107.277	12.404	196.84	75.9937	531.405	107.341
120.762	11.9181	107.299	11.3974	196.9	52.274	532.815	57.2004
120.859	13.0897	107.361	13.6182	196.952	30.7822	535.979	72.5604
120.916	10.3378	107.524	10.4337	197.602	44.9376	539.536	70.2718
120.923	15.7308	107.567	15.6469	197.914	42.859	541.893	115.416
120.934	8.7154	107.683	10.9439	198.736	39.3681	543.444	78.1623
120.938	11.1187	107.704	14.0476	198.848	48.2713	544.623	82.2726
120.978	9.90974	107.711	15.1281	199.043	41.3088	547.087	120.716
121.28	11.3799	107.844	16.8211	199.536	63.7082	547.64	88.3622
121.291	10.6491	107.87	14.5138	200.156	25.3824	549.297	56.8569
121.509	9.84375	107.931	11.4009	200.345	27.6976	550.291	69.1533
121.513	11.4196	107.937	10.3736	200.537	45.8077	550.685	109.108
121.532	11.37	107.957	12.9475	200.662	27	550.962	61.0794
121.605	11.4788	108.011	10.0013	200.715	33.9326	552.63	78.41
121.673	11.7445	108.012	11.8987	200.995	43.7129	553.176	82.0108
121.68	12.0386	108.062	15.025	201.86	38.3801	555.007	120.233
121.699	11.8507	108.098	17.5888	201.917	39.1655	556.123	129.851
121.878	10.9163	108.131	11.7728	201.968	35.2984	556.978	85.5272
121.885	11.9662	108.185	14.5904	202.449	50.108	560.303	117.52
121.925	12.262	108.264	12.4398	202.666	37.5561	561.278	61.2776
121.943	10.6526	108.302	12.3196	202.837	23.6376	561.893	103.693
121.976	11.3718	108.343	19.3134	202.899	14.8988	564.636	56.521
121.981	11.0312	108.412	14.0716	202.924	29.5152	565.962	46.4956
121.986	11.0266	108.45	13.7061	203.334	20.336	573.647	82.4421
122.231	13.6247	108.562	14.6421	203.372	36.8172	574.546	87.1438
122.234	12.5386	108.663	15.6136	203.819	41.9716	577.316	104.06
122.248	12.328	108.689	14.7564	203.995	27.268	577.874	91.87
122.39	9.51781	108.783	11.1955	204.093	24.2323	580.506	66.5457
122.447	10.2977	108.862	13.3684	204.126	33.5018	581.089	105.102
122.451	10.1938	108.928	13.9821	204.431	64.8002	583.952	69.9257
122.456	9.71389	109.051	12.9333	204.521	31.6606	585.003	85.7528
122.612	12.189	109.127	16.1115	204.548	61.329	588.296	112.157
122.688	11.1662	109.259	11.6062	204.603	25.6643	590.673	57.9164
122.718	10.08	109.291	13.1966	204.795	28.2979	601.212	91.9018
122.752	11.3007	109.302	11.3497	206.363	50.7232	603.924	98.002
122.802	11.3974	109.354	12.7349	206.391	19.6113	604.507	88.7778
122.887	10.99	109.37	16.8046	206.482	62.5796	608.097	94.3232
122.902	10.5931	109.49	11.5198	206.998	45.2732	614.866	66.8347
122.934	11.8114	109.507	10.1728	207.148	42.7476	617.398	45.1055
123.172	7.02899	109.584	14.7126	207.362	17.7763	624.747	98.197
123.204	10.3966	109.686	12.3945	207.571	35.8719	628.017	68.0505
123.212	10.4889	109.693	25.7924	207.771	45.8764	628.238	113.63
123.253	11.444	109.733	26.2202	208.182	39.5429	639.093	117.458
123.351	11.5741	109.761	26.996	208.538	46.8815	651.529	26.5511
123.364	11.2337	109.769	17.028	208.566	39.2313	654.986	123.378
123.455	11.9915	109.836	12.9615	208.624	44.6149	670.351	102.712
123.471	12.7074	109.865	13.5265	208.886	37.8389	678.611	126.837
123.499	10.8169	109.886	21.2857	209.199	59.652	688.697	73.3915
123.567	11.0654	109.995	16.672	209.661	40.7699	695.635	103.717
123.727	11.0525	110.199	15.1934	209.866	16.3209	701.248	133.328
123.739	11.39	110.299	17.7302	210.049	58.4756	701.67	157.141
123.842	11.9269	110.485	14.794	210.355	46.31	711.357	132.523
124.101	10.2816	110.564	11.4227	210.391	60.4313	723.032	109.8
124.148	11.6759	110.628	13.6158	210.908	30.7013	724.824	89.8672
124.158	10.1972	110.666	15.6682	211.003	35.1467	736.169	110.249
124.266	8.90155	110.792	11.5164	211.098	30.3854	757.084	52.8885
124.293	11.6477	110.839	21.8773	211.199	45.801	758.652	99.7266
124.321	10.9973	110.879	13.7366	211.703	43.0276	765.553	119.472
124.335	11.7885	110.882	10.9652	211.981	48.6475	766.365	149.924
124.378	11.1073	110.98	13.9535	212.002	40.6963	773.768	118.977
124.458	9.85872	111.02	12.0391	212.005	18.1591	778.009	169.416
124.619	10.2273	111.152	17.5046	212.021	19.9864	779.401	116.024
124.667	11.6071	111.156	11.2781	212.954	26.4807	809.301	97.3203
124.671	10.1965	111.187	13.6261	213.07	62.456	863.034	132.423
124.673	9.82386	111.256	10.7949	213.399	73.9583	872.433	181.892
124.764	11.4708	111.334	13.9469	213.42	49.5764	993.583	140.334
124.782	10.5381	111.357	13.9055	214.426	52.6352
124.816	13.4924	111.46	12.305	214.537	33.545
124.824	10.8174	111.478	11.0114	214.9	28.2941
124.946	9.74629	111.489	12.4022	215.288	37.1632
125.087	10.3776	111.531	12.484	215.805	20.7721
125.128	10.2721	111.537	12.2036	216.292	48.1044
125.175	11.3154	111.571	16.6484	216.485	31.4043
125.308	11.3958	111.583	12.2456	216.652	31.6956
125.316	11.6372	111.606	12.0896	216.658	49.1276
125.432	12.333	111.674	16.4828	217.013	7.59914
125.448	11.7022	111.72	17.9682	217.1	31.9919
125.467	9.54248	112.008	10.7025	217.377	46.3646
125.5	9.60903	112.031	13.1672	218.217	133.561
125.528	9.63679	112.045	13.8324	218.285	53.6616
125.556	11.096	112.106	11.3106	218.496	83.0083
125.629	13.0284	112.117	13.2444	218.679	28.0185
125.729	11.1725	112.126	13.7793	219.546	20.5391
125.745	10.567	112.205	16.6029	220.968	11.7282
125.798	9	112.279	14.1361	221.156	15.8671
125.863	11.1885	112.329	11.3373	221.165	20.6488
125.867	10.4996	112.535	11.766	221.493	39.4121
125.973	11.6605	112.675	21.4159	221.608	47.7657
126.08	11.906	112.73	15.6849	222.028	24.9106
126.258	10.4449	112.844	12.7768	222.045	21.7325
126.27	10.4135	112.921	13.5527	222.046	77.8931
126.468	11.3635	112.938	32.3381	222.133	46.048
126.527	10.0299	112.963	13.1448	222.358	48.2683
126.573	10.8275	113.025	13.5869	222.57	48.6998
126.672	12.9798	113.064	12.1579	222.736	17.1101
126.792	10.6552	113.078	17.8273	223.529	28.56
127.066	12.7537	113.159	12.6023	223.755	11.5357
127.11	11.9695	113.221	11.0533	225.045	34.3911
127.435	12.0559	113.252	17.5549	225.212	19.8188
127.532	12.2277	113.315	12.804	225.248	48.0382
127.567	11.4609	113.329	14.5528	225.518	59.5175
127.568	11.4739	113.608	11.1284	226.393	33.8269
127.58	11.4732	113.706	32.1917	226.732	23.7841
127.603	10.6268	113.789	12.0036	226.822	92.0584
127.62	10.9649	113.862	18.134	226.962	1.24936
127.874	11.4755	113.969	15.181	227.192	42.9665
127.906	11.1934	114.009	14.3085	228.964	43.2318
127.988	10.178	114.02	12.9375	229.3	49.2878
128.006	11.4479	114.045	12.5459	229.334	24.7264
128.21	9.8547	114.089	19.5633	229.863	20.968
128.275	12.5671	114.09	13.5614	230.521	25.4769
128.356	11.5835	114.122	11.7	230.681	66.6781
128.381	11.4451	114.123	13.753	230.802	100.186
128.395	10.0031	114.26	14.3533	231.159	59.5429
128.486	9.34152	114.264	14.7502	231.839	60.766
128.554	11.5329	114.304	15.2064	232.372	39.8194
128.587	10.1488	114.34	19.7841	233.206	30.4066
128.666	11.4367	114.343	11.6648	233.248	51.9988
128.676	9.57919	114.469	17.257	234.667	103.662
128.808	15.2719	114.487	12.8706	235.021	46.8651
128.998	12.3132	114.545	16.1436	235.37	47.1088
129.128	10.3543	114.561	15.8106	235.569	23.6055
129.134	10.9183	114.712	11.3176	235.593	20.0595
129.337	10.2391	114.726	12.6179	237.386	78.8155
129.619	10.9235	114.74	14.1897	237.424	12.0064
129.683	12.267	114.773	13.5495	237.72	37.5264
129.72	11.5168	114.803	16.4002	238.729	9.67273
129.743	11.3477	114.905	11.8339	239.909	13.5209
129.795	11.088	114.943	12.9943	240.226	62.6626
129.865	17.226	114.981	25.6892	240.87	81.6582
129.988	9.81187	115.093	18.4747	241.498	30.6412
130.064	12.4137	115.123	20.8331	241.589	46.9623
130.165	10.6959	115.129	15.5891	242.617	27.8162
130.281	11.023	115.171	15.829	242.739	32.6322
130.743	12.7749	115.59	14.3174	243.455	57.2564
130.748	10.5088	115.646	18.1473	243.766	39.808
130.766	12.1516	115.758	16.3404	243.915	114.651
130.807	10.6711	115.831	10.7212	244.17	39.3455
130.868	11.0417	116.098	15.3686	244.591	43.3989
131.2	11.9441	116.127	11.9902	246.54	33.6888
131.31	12.5165	116.271	14.0841	246.773	21.5199
131.352	12.4325	116.302	14.3505	248.603	50.1209
131.399	10.7203	116.349	11.8962	248.82	56.3209
131.409	10.8407	116.488	16.2169	250.788	46.352
131.459	13.7014	116.686	12.7323	253.041	31.556
131.551	8.07624	116.78	12.5977	256.165	19.0569
131.566	13.1419	116.8	14.3802	256.197	46.328
131.912	11.3897	116.894	20.1638	256.373	30.012
131.964	10.748	116.921	10.4725	256.901	37.0488
132.164	10.3612	117.045	15.5909	257.039	35.4786
132.245	11.8208	117.16	17.196	258.286	28.9602
132.365	11.3123	117.195	13.1609	258.614	16.8127
132.572	9.68447	117.206	15.5284	260	14.1399
132.572	11.6526	117.302	15.2517	260.825	82.8953
132.577	12.1401	117.308	11.2277	261.675	65.7261
132.657	11.9565	117.372	14.6031	262.552	26.5964
132.672	11.9825	117.432	13.0289	263.145	16.9459
132.862	13.8403	117.438	12.8065	263.658	25.0554
133.194	10.6996	117.469	14.9313	264.868	24.4511
133.325	11.0539	117.494	11.9534	266.283	42.5484
133.45	10.4159	117.568	10.2568	268.23	48.4651
133.644	10.2402	117.591	12.7622	268.459	27.6885
133.645	11.2592	117.692	13.5152	269.61	88.4318
133.651	9.70774	117.76	14.4562	272.76	60.8396
133.677	12.4736	117.817	13.7315	276.654	37.7385
133.686	12.5121	117.879	11.5117	277.598	72.3198
133.691	9.17933	117.91	14.1815	279.248	20.7733
133.737	10.971	118.282	18.5344	280.928	75.8305
133.832	11.4895	118.334	11.301	283.079	58.4174
133.891	12.6371	118.386	16.8747	285.242	24.8531
133.891	12.734	118.395	11.9458	286.043	5.23404
134.072	10.4249	118.443	9.13916	286.484	37.7719
134.075	11.8293	118.499	15.0889	287.634	46.0427
134.188	11.9248	118.538	18.8858	288.229	78.8755
134.223	11.3553	118.583	15.6048	289.099	64.3295
134.401	12.0529	118.621	10.3794	289.554	36.1389
134.523	8.5788	118.638	14.2771	293.164	25.9904
134.586	12.0516	118.659	14.7353	294.867	57.8704
134.592	11.1844	118.709	11.399	301.795	132.568
134.619	11.1117	118.759	14.2537	304.505	35.7961
134.69	9.73005	118.992	12.0934	307.169	12.7174
134.711	11.6731	119.058	13.1883	307.574	81.9993
134.733	11.4244	119.237	13.2596	309.8	12.4265
[truncated: 469 more rows]
